# Supplementary material for: Supervised machine learning for predicting drug release from acetalated dextran nanofibers
Source: Royal Society of Chemistry journal article supplement (doi:10.1039/d5bm00259a), 2025-01-01
Supplement: d5bm00259a1.xlsx [file d5bm00259a1.xlsx]

## Sheet: File S1 (All Data)
All Data	ID			Drug-Specific Parameters				Scaffold Specific Parameters				In Vitro
Observation #	Scaffold #	Drug	Solvent	MW (g/mol)	LogP	PSA (Å)	pKa	%CAC	%Load (wt.)	Fd (µm)	Time (Days)	Observed F(t)
1	1	DXR	A	579.15	1.27	206	8.2	47	3.81	0.63	0	-0.035196
2	1	DXR	A	579.15	1.27	206	8.2	47	3.81	0.63	0	-0.00392502
3	1	DXR	A	579.15	1.27	206	8.2	47	3.81	0.63	0	-0.0942124
4	1	DXR	A	579.15	1.27	206	8.2	47	3.81	0.63	0	0.0303778
5	1	DXR	A	579.15	1.27	206	8.2	47	3.81	0.63	0	0.0446207
6	1	DXR	A	579.15	1.27	206	8.2	47	3.81	0.63	0	0.0583348
7	1	DXR	A	579.15	1.27	206	8.2	47	3.81	0.63	1	0.567589
8	1	DXR	A	579.15	1.27	206	8.2	47	3.81	0.63	1	0.804395
9	1	DXR	A	579.15	1.27	206	8.2	47	3.81	0.63	1	0.658476
10	1	DXR	A	579.15	1.27	206	8.2	47	3.81	0.63	2	0.660662
11	1	DXR	A	579.15	1.27	206	8.2	47	3.81	0.63	2	0.84871
12	1	DXR	A	579.15	1.27	206	8.2	47	3.81	0.63	2	0.702579
13	1	DXR	A	579.15	1.27	206	8.2	47	3.81	0.63	3	0.763676
14	1	DXR	A	579.15	1.27	206	8.2	47	3.81	0.63	3	0.830025
15	1	DXR	A	579.15	1.27	206	8.2	47	3.81	0.63	3	0.740514
16	1	DXR	A	579.15	1.27	206	8.2	47	3.81	0.63	5	0.854527
17	1	DXR	A	579.15	1.27	206	8.2	47	3.81	0.63	5	0.922675
18	1	DXR	A	579.15	1.27	206	8.2	47	3.81	0.63	5	0.862706
19	2	DXR	A	579.15	1.27	206	8.2	50	4.32	0.548	0	-0.116866
20	2	DXR	A	579.15	1.27	206	8.2	50	4.32	0.548	0	-0.0283306
21	2	DXR	A	579.15	1.27	206	8.2	50	4.32	0.548	0	0.0016496
22	2	DXR	A	579.15	1.27	206	8.2	50	4.32	0.548	0	-0.00709861
23	2	DXR	A	579.15	1.27	206	8.2	50	4.32	0.548	0	0.00937613
24	2	DXR	A	579.15	1.27	206	8.2	50	4.32	0.548	0	0.14127
25	2	DXR	A	579.15	1.27	206	8.2	50	4.32	0.548	1	0.350269
26	2	DXR	A	579.15	1.27	206	8.2	50	4.32	0.548	1	0.337051
27	2	DXR	A	579.15	1.27	206	8.2	50	4.32	0.548	1	0.30391
28	2	DXR	A	579.15	1.27	206	8.2	50	4.32	0.548	3	0.437209
29	2	DXR	A	579.15	1.27	206	8.2	50	4.32	0.548	3	0.426992
30	2	DXR	A	579.15	1.27	206	8.2	50	4.32	0.548	3	0.459207
31	2	DXR	A	579.15	1.27	206	8.2	50	4.32	0.548	7	0.404994
32	2	DXR	A	579.15	1.27	206	8.2	50	4.32	0.548	7	0.619037
33	2	DXR	A	579.15	1.27	206	8.2	50	4.32	0.548	7	0.421468
34	2	DXR	A	579.15	1.27	206	8.2	50	4.32	0.548	14	0.819225
35	2	DXR	A	579.15	1.27	206	8.2	50	4.32	0.548	14	0.957344
36	2	DXR	A	579.15	1.27	206	8.2	50	4.32	0.548	14	0.643718
37	2	DXR	A	579.15	1.27	206	8.2	50	4.32	0.548	21	1.0257
38	2	DXR	A	579.15	1.27	206	8.2	50	4.32	0.548	21	0.91852
39	2	DXR	A	579.15	1.27	206	8.2	50	4.32	0.548	21	0.86833
40	3	DXR	A	579.15	1.27	206	8.2	59	3.93	0.428	0	-0.139252
41	3	DXR	A	579.15	1.27	206	8.2	59	3.93	0.428	0	-0.0379375
42	3	DXR	A	579.15	1.27	206	8.2	59	3.93	0.428	0	-0.114599
43	3	DXR	A	579.15	1.27	206	8.2	59	3.93	0.428	0	0.130772
44	3	DXR	A	579.15	1.27	206	8.2	59	3.93	0.428	0	0.0637534
45	3	DXR	A	579.15	1.27	206	8.2	59	3.93	0.428	0	0.0972628
46	3	DXR	A	579.15	1.27	206	8.2	59	3.93	0.428	1	0.301397
47	3	DXR	A	579.15	1.27	206	8.2	59	3.93	0.428	1	0.391052
48	3	DXR	A	579.15	1.27	206	8.2	59	3.93	0.428	1	0.411328
49	3	DXR	A	579.15	1.27	206	8.2	59	3.93	0.428	3	0.382879
50	3	DXR	A	579.15	1.27	206	8.2	59	3.93	0.428	3	0.363081
51	3	DXR	A	579.15	1.27	206	8.2	59	3.93	0.428	3	0.48057
52	3	DXR	A	579.15	1.27	206	8.2	59	3.93	0.428	7	0.381272
53	3	DXR	A	579.15	1.27	206	8.2	59	3.93	0.428	7	0.413448
54	3	DXR	A	579.15	1.27	206	8.2	59	3.93	0.428	7	0.429109
55	3	DXR	A	579.15	1.27	206	8.2	59	3.93	0.428	14	0.576653
56	3	DXR	A	579.15	1.27	206	8.2	59	3.93	0.428	14	0.537638
57	3	DXR	A	579.15	1.27	206	8.2	59	3.93	0.428	14	0.554051
58	3	DXR	A	579.15	1.27	206	8.2	59	3.93	0.428	21	0.620591
59	3	DXR	A	579.15	1.27	206	8.2	59	3.93	0.428	21	0.505155
60	3	DXR	A	579.15	1.27	206	8.2	59	3.93	0.428	21	0.453728
61	3	DXR	A	579.15	1.27	206	8.2	59	3.93	0.428	28	0.775316
62	3	DXR	A	579.15	1.27	206	8.2	59	3.93	0.428	28	0.681934
63	3	DXR	A	579.15	1.27	206	8.2	59	3.93	0.428	28	0.616112
64	3	DXR	A	579.15	1.27	206	8.2	59	3.93	0.428	35	0.348755
65	3	DXR	A	579.15	1.27	206	8.2	59	3.93	0.428	35	0.623703
66	3	DXR	A	579.15	1.27	206	8.2	59	3.93	0.428	35	0.764613
67	4	ERL	A	393.4	3.3	74.7	5.42	47	9.52	1.042	0	-0.0549653
68	4	ERL	A	393.4	3.3	74.7	5.42	47	9.52	1.042	0	0.0106254
69	4	ERL	A	393.4	3.3	74.7	5.42	47	9.52	1.042	0	-0.0107129
70	4	ERL	A	393.4	3.3	74.7	5.42	47	9.52	1.042	0	0.0265142
71	4	ERL	A	393.4	3.3	74.7	5.42	47	9.52	1.042	0	0.00136784
72	4	ERL	A	393.4	3.3	74.7	5.42	47	9.52	1.042	0	0.0271708
73	4	ERL	A	393.4	3.3	74.7	5.42	47	9.52	1.042	1	0.16065
74	4	ERL	A	393.4	3.3	74.7	5.42	47	9.52	1.042	1	0.18514
75	4	ERL	A	393.4	3.3	74.7	5.42	47	9.52	1.042	1	0.146534
76	4	ERL	A	393.4	3.3	74.7	5.42	47	9.52	1.042	2	0.204114
77	4	ERL	A	393.4	3.3	74.7	5.42	47	9.52	1.042	2	0.192625
78	4	ERL	A	393.4	3.3	74.7	5.42	47	9.52	1.042	2	0.144302
79	4	ERL	A	393.4	3.3	74.7	5.42	47	9.52	1.042	3	0.183498
80	4	ERL	A	393.4	3.3	74.7	5.42	47	9.52	1.042	3	0.165968
81	4	ERL	A	393.4	3.3	74.7	5.42	47	9.52	1.042	3	0.161438
82	4	ERL	A	393.4	3.3	74.7	5.42	47	9.52	1.042	5	0.535876
83	4	ERL	A	393.4	3.3	74.7	5.42	47	9.52	1.042	5	0.56529
84	4	ERL	A	393.4	3.3	74.7	5.42	47	9.52	1.042	5	0.16111
85	4	ERL	A	393.4	3.3	74.7	5.42	47	9.52	1.042	7	0.942419
86	4	ERL	A	393.4	3.3	74.7	5.42	47	9.52	1.042	7	0.800077
87	4	ERL	A	393.4	3.3	74.7	5.42	47	9.52	1.042	7	0.693582
88	5	ERL	A	393.4	3.3	74.7	5.42	50	10.51	0.664	0	0.0482122
89	5	ERL	A	393.4	3.3	74.7	5.42	50	10.51	0.664	0	0.00220088
90	5	ERL	A	393.4	3.3	74.7	5.42	50	10.51	0.664	0	0.00830019
91	5	ERL	A	393.4	3.3	74.7	5.42	50	10.51	0.664	0	-0.00970165
92	5	ERL	A	393.4	3.3	74.7	5.42	50	10.51	0.664	0	-0.0252164
93	5	ERL	A	393.4	3.3	74.7	5.42	50	10.51	0.664	0	-0.0237952
94	5	ERL	A	393.4	3.3	74.7	5.42	50	10.51	0.664	1	0.112865
95	5	ERL	A	393.4	3.3	74.7	5.42	50	10.51	0.664	1	0.0161381
96	5	ERL	A	393.4	3.3	74.7	5.42	50	10.51	0.664	1	0.0718778
97	5	ERL	A	393.4	3.3	74.7	5.42	50	10.51	0.664	3	0.109652
98	5	ERL	A	393.4	3.3	74.7	5.42	50	10.51	0.664	3	0.0386838
99	5	ERL	A	393.4	3.3	74.7	5.42	50	10.51	0.664	3	0.0437997
100	5	ERL	A	393.4	3.3	74.7	5.42	50	10.51	0.664	7	0.161228
101	5	ERL	A	393.4	3.3	74.7	5.42	50	10.51	0.664	7	0.0725916
102	5	ERL	A	393.4	3.3	74.7	5.42	50	10.51	0.664	7	0.10525
103	5	ERL	A	393.4	3.3	74.7	5.42	50	10.51	0.664	14	0.244213
104	5	ERL	A	393.4	3.3	74.7	5.42	50	10.51	0.664	14	0.147427
105	5	ERL	A	393.4	3.3	74.7	5.42	50	10.51	0.664	14	0.260036
106	5	ERL	A	393.4	3.3	74.7	5.42	50	10.51	0.664	21	0.410123
107	5	ERL	A	393.4	3.3	74.7	5.42	50	10.51	0.664	21	0.354502
108	5	ERL	A	393.4	3.3	74.7	5.42	50	10.51	0.664	21	0.357358
109	5	ERL	A	393.4	3.3	74.7	5.42	50	10.51	0.664	38	0.648251
110	5	ERL	A	393.4	3.3	74.7	5.42	50	10.51	0.664	38	0.72612
111	5	ERL	A	393.4	3.3	74.7	5.42	50	10.51	0.664	38	0.673355
112	5	ERL	A	393.4	3.3	74.7	5.42	50	10.51	0.664	49	0.665205
113	5	ERL	A	393.4	3.3	74.7	5.42	50	10.51	0.664	49	0.804703
114	5	ERL	A	393.4	3.3	74.7	5.42	50	10.51	0.664	49	0.801074
115	6	EVR	A	958.2	5.9	205	10.4	47	4.2	0.63475	0	0.0412925
116	6	EVR	A	958.2	5.9	205	10.4	47	4.2	0.63475	0	0.000164785
117	6	EVR	A	958.2	5.9	205	10.4	47	4.2	0.63475	0	9.61248e-05
118	6	EVR	A	958.2	5.9	205	10.4	47	4.2	0.63475	0	-0.0319684
119	6	EVR	A	958.2	5.9	205	10.4	47	4.2	0.63475	0	-0.00958502
120	6	EVR	A	958.2	5.9	205	10.4	47	4.2	0.63475	1	0.313875
121	6	EVR	A	958.2	5.9	205	10.4	47	4.2	0.63475	1	0.25057
122	6	EVR	A	958.2	5.9	205	10.4	47	4.2	0.63475	2	0.599503
123	6	EVR	A	958.2	5.9	205	10.4	47	4.2	0.63475	2	0.39716
124	6	EVR	A	958.2	5.9	205	10.4	47	4.2	0.63475	2	0.465477
125	6	EVR	A	958.2	5.9	205	10.4	47	4.2	0.63475	3	0.716157
126	6	EVR	A	958.2	5.9	205	10.4	47	4.2	0.63475	3	0.815784
127	6	EVR	A	958.2	5.9	205	10.4	47	4.2	0.63475	3	0.604652
128	6	EVR	A	958.2	5.9	205	10.4	47	4.2	0.63475	5	0.975282
129	6	EVR	A	958.2	5.9	205	10.4	47	4.2	0.63475	5	0.908063
130	6	EVR	A	958.2	5.9	205	10.4	47	4.2	0.63475	5	0.977479
131	7	EVR	A	958.2	5.9	205	10.4	50	4.46	0.59495	0	-0.0530216
132	7	EVR	A	958.2	5.9	205	10.4	50	4.46	0.59495	0	-0.0202512
133	7	EVR	A	958.2	5.9	205	10.4	50	4.46	0.59495	0	0.0379001
134	7	EVR	A	958.2	5.9	205	10.4	50	4.46	0.59495	0	0.0659156
135	7	EVR	A	958.2	5.9	205	10.4	50	4.46	0.59495	0	-0.0593187
136	7	EVR	A	958.2	5.9	205	10.4	50	4.46	0.59495	0	0.0287758
137	7	EVR	A	958.2	5.9	205	10.4	50	4.46	0.59495	1	0.255722
138	7	EVR	A	958.2	5.9	205	10.4	50	4.46	0.59495	1	0.155735
139	7	EVR	A	958.2	5.9	205	10.4	50	4.46	0.59495	1	0.115947
140	7	EVR	A	958.2	5.9	205	10.4	50	4.46	0.59495	3	0.294347
141	7	EVR	A	958.2	5.9	205	10.4	50	4.46	0.59495	3	0.300095
142	7	EVR	A	958.2	5.9	205	10.4	50	4.46	0.59495	3	0.279943
143	7	EVR	A	958.2	5.9	205	10.4	50	4.46	0.59495	5	0.495611
144	7	EVR	A	958.2	5.9	205	10.4	50	4.46	0.59495	5	0.509821
145	7	EVR	A	958.2	5.9	205	10.4	50	4.46	0.59495	5	0.498001
146	7	EVR	A	958.2	5.9	205	10.4	50	4.46	0.59495	7	0.524548
147	7	EVR	A	958.2	5.9	205	10.4	50	4.46	0.59495	7	0.61885
148	7	EVR	A	958.2	5.9	205	10.4	50	4.46	0.59495	7	0.621434
149	7	EVR	A	958.2	5.9	205	10.4	50	4.46	0.59495	10	0.73957
150	7	EVR	A	958.2	5.9	205	10.4	50	4.46	0.59495	10	0.927206
151	7	EVR	A	958.2	5.9	205	10.4	50	4.46	0.59495	10	0.711151
152	8	EVR	A	958.2	5.9	205	10.4	59	4.42	0.44935	0	-0.0257763
153	8	EVR	A	958.2	5.9	205	10.4	59	4.42	0.44935	0	0.0285011
154	8	EVR	A	958.2	5.9	205	10.4	59	4.42	0.44935	0	0.00920971
155	8	EVR	A	958.2	5.9	205	10.4	59	4.42	0.44935	0	0.0303975
156	8	EVR	A	958.2	5.9	205	10.4	59	4.42	0.44935	0	-0.0261687
157	8	EVR	A	958.2	5.9	205	10.4	59	4.42	0.44935	0	-0.0161633
158	8	EVR	A	958.2	5.9	205	10.4	59	4.42	0.44935	1	0.0468115
159	8	EVR	A	958.2	5.9	205	10.4	59	4.42	0.44935	1	0.0156184
160	8	EVR	A	958.2	5.9	205	10.4	59	4.42	0.44935	1	0.106778
161	8	EVR	A	958.2	5.9	205	10.4	59	4.42	0.44935	3	0.226515
162	8	EVR	A	958.2	5.9	205	10.4	59	4.42	0.44935	3	0.103508
163	8	EVR	A	958.2	5.9	205	10.4	59	4.42	0.44935	3	0.179562
164	8	EVR	A	958.2	5.9	205	10.4	59	4.42	0.44935	7	0.23057
165	8	EVR	A	958.2	5.9	205	10.4	59	4.42	0.44935	7	0.242079
166	8	EVR	A	958.2	5.9	205	10.4	59	4.42	0.44935	7	0.268498
167	8	EVR	A	958.2	5.9	205	10.4	59	4.42	0.44935	14	0.503264
168	8	EVR	A	958.2	5.9	205	10.4	59	4.42	0.44935	14	0.477303
169	8	EVR	A	958.2	5.9	205	10.4	59	4.42	0.44935	14	0.480965
170	8	EVR	A	958.2	5.9	205	10.4	59	4.42	0.44935	21	0.623132
171	8	EVR	A	958.2	5.9	205	10.4	59	4.42	0.44935	21	0.589192
172	8	EVR	A	958.2	5.9	205	10.4	59	4.42	0.44935	21	0.612473
173	8	EVR	A	958.2	5.9	205	10.4	59	4.42	0.44935	28	0.76458
174	8	EVR	A	958.2	5.9	205	10.4	59	4.42	0.44935	28	0.735087
175	8	EVR	A	958.2	5.9	205	10.4	59	4.42	0.44935	28	0.793615
176	8	EVR	A	958.2	5.9	205	10.4	59	4.42	0.44935	35	0.967237
177	8	EVR	A	958.2	5.9	205	10.4	59	4.42	0.44935	35	1
178	8	EVR	A	958.2	5.9	205	10.4	59	4.42	0.44935	35	0.920546
179	9	PTX	A	853.9	2.5	221	10.4	64.5	5.2	0.341	0	0.0144081
180	9	PTX	A	853.9	2.5	221	10.4	64.5	5.2	0.341	0	-0.00612586
181	9	PTX	A	853.9	2.5	221	10.4	64.5	5.2	0.341	0	-0.000545404
182	9	PTX	A	853.9	2.5	221	10.4	64.5	5.2	0.341	0	-0.00583691
183	9	PTX	A	853.9	2.5	221	10.4	64.5	5.2	0.341	0	-0.00189988
184	9	PTX	A	853.9	2.5	221	10.4	64.5	5.2	0.341	0.0833333	-0.0238425
185	9	PTX	A	853.9	2.5	221	10.4	64.5	5.2	0.341	0.0833333	0.0327567
186	9	PTX	A	853.9	2.5	221	10.4	64.5	5.2	0.341	0.0833333	0.0200246
187	9	PTX	A	853.9	2.5	221	10.4	64.5	5.2	0.341	0.166667	0.0178575
188	9	PTX	A	853.9	2.5	221	10.4	64.5	5.2	0.341	0.166667	0.013776
189	9	PTX	A	853.9	2.5	221	10.4	64.5	5.2	0.341	0.166667	0.0150763
190	9	PTX	A	853.9	2.5	221	10.4	64.5	5.2	0.341	1	0.0121686
191	9	PTX	A	853.9	2.5	221	10.4	64.5	5.2	0.341	1	0.02286
192	9	PTX	A	853.9	2.5	221	10.4	64.5	5.2	0.341	1	-0.000635703
193	9	PTX	A	853.9	2.5	221	10.4	64.5	5.2	0.341	3	0.0390235
194	9	PTX	A	853.9	2.5	221	10.4	64.5	5.2	0.341	3	0.0277
195	9	PTX	A	853.9	2.5	221	10.4	64.5	5.2	0.341	3	0.0325761
196	9	PTX	A	853.9	2.5	221	10.4	64.5	5.2	0.341	6	0.0505636
197	9	PTX	A	853.9	2.5	221	10.4	64.5	5.2	0.341	6	0.0785924
198	9	PTX	A	853.9	2.5	221	10.4	64.5	5.2	0.341	6	0.0880737
199	9	PTX	A	853.9	2.5	221	10.4	64.5	5.2	0.341	9	0.0765877
200	9	PTX	A	853.9	2.5	221	10.4	64.5	5.2	0.341	9	0.151933
201	9	PTX	A	853.9	2.5	221	10.4	64.5	5.2	0.341	9	0.183465
202	9	PTX	A	853.9	2.5	221	10.4	64.5	5.2	0.341	12	0.193434
203	9	PTX	A	853.9	2.5	221	10.4	64.5	5.2	0.341	12	0.223431
204	9	PTX	A	853.9	2.5	221	10.4	64.5	5.2	0.341	12	0.249961
205	9	PTX	A	853.9	2.5	221	10.4	64.5	5.2	0.341	15	0.31187
206	9	PTX	A	853.9	2.5	221	10.4	64.5	5.2	0.341	15	0.207575
207	9	PTX	A	853.9	2.5	221	10.4	64.5	5.2	0.341	15	0.257926
208	9	PTX	A	853.9	2.5	221	10.4	64.5	5.2	0.341	18	0.314416
209	9	PTX	A	853.9	2.5	221	10.4	64.5	5.2	0.341	18	0.317541
210	9	PTX	A	853.9	2.5	221	10.4	64.5	5.2	0.341	18	0.22009
211	9	PTX	A	853.9	2.5	221	10.4	64.5	5.2	0.341	21	0.359223
212	9	PTX	A	853.9	2.5	221	10.4	64.5	5.2	0.341	21	0.292004
213	9	PTX	A	853.9	2.5	221	10.4	64.5	5.2	0.341	21	0.272391
214	9	PTX	A	853.9	2.5	221	10.4	64.5	5.2	0.341	28	0.446126
215	9	PTX	A	853.9	2.5	221	10.4	64.5	5.2	0.341	28	0.389129
216	9	PTX	A	853.9	2.5	221	10.4	64.5	5.2	0.341	35	0.468827
217	9	PTX	A	853.9	2.5	221	10.4	64.5	5.2	0.341	35	0.443218
218	10	PTX	A	853.9	2.5	221	10.4	45	10.6	0.723	0	0.000840763
219	10	PTX	A	853.9	2.5	221	10.4	45	10.6	0.723	0	-0.0379321
220	10	PTX	A	853.9	2.5	221	10.4	45	10.6	0.723	0	0.0384014
221	10	PTX	A	853.9	2.5	221	10.4	45	10.6	0.723	0	-0.0153293
222	10	PTX	A	853.9	2.5	221	10.4	45	10.6	0.723	0	0.00234632
223	10	PTX	A	853.9	2.5	221	10.4	45	10.6	0.723	0	0.0116729
224	10	PTX	A	853.9	2.5	221	10.4	45	10.6	0.723	1	0.29327
225	10	PTX	A	853.9	2.5	221	10.4	45	10.6	0.723	1	0.203484
226	10	PTX	A	853.9	2.5	221	10.4	45	10.6	0.723	1	0.243587
227	10	PTX	A	853.9	2.5	221	10.4	45	10.6	0.723	2	0.412756
228	10	PTX	A	853.9	2.5	221	10.4	45	10.6	0.723	2	0.355799
229	10	PTX	A	853.9	2.5	221	10.4	45	10.6	0.723	2	0.233713
230	10	PTX	A	853.9	2.5	221	10.4	45	10.6	0.723	3	0.412561
231	10	PTX	A	853.9	2.5	221	10.4	45	10.6	0.723	3	0.537033
232	10	PTX	A	853.9	2.5	221	10.4	45	10.6	0.723	3	0.268223
233	10	PTX	A	853.9	2.5	221	10.4	45	10.6	0.723	4	0.692085
234	10	PTX	A	853.9	2.5	221	10.4	45	10.6	0.723	4	0.675348
235	10	PTX	A	853.9	2.5	221	10.4	45	10.6	0.723	4	0.515212
236	10	PTX	A	853.9	2.5	221	10.4	45	10.6	0.723	5	0.573577
237	10	PTX	A	853.9	2.5	221	10.4	45	10.6	0.723	5	0.564504
238	10	PTX	A	853.9	2.5	221	10.4	45	10.6	0.723	5	0.718403
239	10	PTX	A	853.9	2.5	221	10.4	45	10.6	0.723	6	0.981953
240	10	PTX	A	853.9	2.5	221	10.4	45	10.6	0.723	6	0.803281
241	10	PTX	A	853.9	2.5	221	10.4	45	10.6	0.723	6	0.83259
242	10	PTX	A	853.9	2.5	221	10.4	45	10.6	0.723	7	0.981992
243	10	PTX	A	853.9	2.5	221	10.4	45	10.6	0.723	7	0.940443
244	10	PTX	A	853.9	2.5	221	10.4	45	10.6	0.723	7	0.9082
245	11	PTX	A	853.9	2.5	221	10.4	50	7.68	0.5	0	-0.168011
246	11	PTX	A	853.9	2.5	221	10.4	50	7.68	0.5	0	0.0496627
247	11	PTX	A	853.9	2.5	221	10.4	50	7.68	0.5	0	0.293185
248	11	PTX	A	853.9	2.5	221	10.4	50	7.68	0.5	0	-0.0704137
249	11	PTX	A	853.9	2.5	221	10.4	50	7.68	0.5	0	-0.0924685
250	11	PTX	A	853.9	2.5	221	10.4	50	7.68	0.5	0	-0.0119542
251	11	PTX	A	853.9	2.5	221	10.4	50	7.68	0.5	1	-0.029657
252	11	PTX	A	853.9	2.5	221	10.4	50	7.68	0.5	1	-0.0173266
253	11	PTX	A	853.9	2.5	221	10.4	50	7.68	0.5	1	-0.0136767
254	11	PTX	A	853.9	2.5	221	10.4	50	7.68	0.5	7	0.170995
255	11	PTX	A	853.9	2.5	221	10.4	50	7.68	0.5	7	0.0748749
256	11	PTX	A	853.9	2.5	221	10.4	50	7.68	0.5	7	0.149334
257	11	PTX	A	853.9	2.5	221	10.4	50	7.68	0.5	14	0.252287
258	11	PTX	A	853.9	2.5	221	10.4	50	7.68	0.5	14	0.222558
259	11	PTX	A	853.9	2.5	221	10.4	50	7.68	0.5	14	0.238705
260	11	PTX	A	853.9	2.5	221	10.4	50	7.68	0.5	21	0.435837
261	11	PTX	A	853.9	2.5	221	10.4	50	7.68	0.5	21	0.366908
262	11	PTX	A	853.9	2.5	221	10.4	50	7.68	0.5	21	0.320822
263	11	PTX	A	853.9	2.5	221	10.4	50	7.68	0.5	28	0.44234
264	11	PTX	A	853.9	2.5	221	10.4	50	7.68	0.5	28	0.540793
265	11	PTX	A	853.9	2.5	221	10.4	50	7.68	0.5	28	0.602238
266	11	PTX	A	853.9	2.5	221	10.4	50	7.68	0.5	35	0.687764
267	11	PTX	A	853.9	2.5	221	10.4	50	7.68	0.5	35	0.599775
268	11	PTX	A	853.9	2.5	221	10.4	50	7.68	0.5	35	0.849207
269	12	PTX	A	853.9	2.5	221	10.4	60	8.22	0.715	0	-0.0694966
270	12	PTX	A	853.9	2.5	221	10.4	60	8.22	0.715	0	0.0522491
271	12	PTX	A	853.9	2.5	221	10.4	60	8.22	0.715	0	0.0109118
272	12	PTX	A	853.9	2.5	221	10.4	60	8.22	0.715	0	-0.00308526
273	12	PTX	A	853.9	2.5	221	10.4	60	8.22	0.715	0	0.00277035
274	12	PTX	A	853.9	2.5	221	10.4	60	8.22	0.715	0	0.00665061
275	12	PTX	A	853.9	2.5	221	10.4	60	8.22	0.715	1	0.115326
276	12	PTX	A	853.9	2.5	221	10.4	60	8.22	0.715	1	0.111519
277	12	PTX	A	853.9	2.5	221	10.4	60	8.22	0.715	1	0.0694262
278	12	PTX	A	853.9	2.5	221	10.4	60	8.22	0.715	7	0.127883
279	12	PTX	A	853.9	2.5	221	10.4	60	8.22	0.715	7	0.162418
280	12	PTX	A	853.9	2.5	221	10.4	60	8.22	0.715	7	0.253555
281	12	PTX	A	853.9	2.5	221	10.4	60	8.22	0.715	14	0.176715
282	12	PTX	A	853.9	2.5	221	10.4	60	8.22	0.715	14	0.267905
283	12	PTX	A	853.9	2.5	221	10.4	60	8.22	0.715	14	0.159857
284	12	PTX	A	853.9	2.5	221	10.4	60	8.22	0.715	21	0.219816
285	12	PTX	A	853.9	2.5	221	10.4	60	8.22	0.715	21	0.226579
286	12	PTX	A	853.9	2.5	221	10.4	60	8.22	0.715	21	0.171006
287	12	PTX	A	853.9	2.5	221	10.4	60	8.22	0.715	28	0.322675
288	12	PTX	A	853.9	2.5	221	10.4	60	8.22	0.715	28	0.205788
289	12	PTX	A	853.9	2.5	221	10.4	60	8.22	0.715	28	0.217495
290	12	PTX	A	853.9	2.5	221	10.4	60	8.22	0.715	35	0.327939
291	12	PTX	A	853.9	2.5	221	10.4	60	8.22	0.715	35	0.329405
292	12	PTX	A	853.9	2.5	221	10.4	60	8.22	0.715	35	0.348879
293	12	PTX	A	853.9	2.5	221	10.4	60	8.22	0.715	42	0.337476
294	12	PTX	A	853.9	2.5	221	10.4	60	8.22	0.715	42	0.398631
295	12	PTX	A	853.9	2.5	221	10.4	60	8.22	0.715	42	0.302704
296	12	PTX	A	853.9	2.5	221	10.4	60	8.22	0.715	49	0.408021
297	12	PTX	A	853.9	2.5	221	10.4	60	8.22	0.715	49	0.345473
298	12	PTX	A	853.9	2.5	221	10.4	60	8.22	0.715	49	0.381388
299	12	PTX	A	853.9	2.5	221	10.4	60	8.22	0.715	56	0.466674
300	12	PTX	A	853.9	2.5	221	10.4	60	8.22	0.715	56	0.402392
301	12	PTX	A	853.9	2.5	221	10.4	60	8.22	0.715	56	0.352817
302	12	PTX	A	853.9	2.5	221	10.4	60	8.22	0.715	63	0.445373
303	12	PTX	A	853.9	2.5	221	10.4	60	8.22	0.715	63	0.51366
304	12	PTX	A	853.9	2.5	221	10.4	60	8.22	0.715	63	0.372956
305	18	PTX	A	853.9	2.5	221	10.4	61	9.4	0.533	0	-0.011606
306	18	PTX	A	853.9	2.5	221	10.4	61	9.4	0.533	0	0.00361661
307	18	PTX	A	853.9	2.5	221	10.4	61	9.4	0.533	0	-0.00433297
308	18	PTX	A	853.9	2.5	221	10.4	61	9.4	0.533	0	-0.00024376
309	18	PTX	A	853.9	2.5	221	10.4	61	9.4	0.533	0	0.00512892
310	18	PTX	A	853.9	2.5	221	10.4	61	9.4	0.533	0	0.00743718
311	18	PTX	A	853.9	2.5	221	10.4	61	9.4	0.533	0.0833333	-2.48735e-05
312	18	PTX	A	853.9	2.5	221	10.4	61	9.4	0.533	0.0833333	-0.00820329
313	18	PTX	A	853.9	2.5	221	10.4	61	9.4	0.533	0.0833333	0.00682032
314	18	PTX	A	853.9	2.5	221	10.4	61	9.4	0.533	0.166667	0.000383052
315	18	PTX	A	853.9	2.5	221	10.4	61	9.4	0.533	0.166667	-0.0120139
316	18	PTX	A	853.9	2.5	221	10.4	61	9.4	0.533	0.166667	0.0045817
317	18	PTX	A	853.9	2.5	221	10.4	61	9.4	0.533	1	0.0113075
318	18	PTX	A	853.9	2.5	221	10.4	61	9.4	0.533	1	-0.00556669
319	18	PTX	A	853.9	2.5	221	10.4	61	9.4	0.533	1	0.00649199
320	18	PTX	A	853.9	2.5	221	10.4	61	9.4	0.533	3	0.00580548
321	18	PTX	A	853.9	2.5	221	10.4	61	9.4	0.533	3	0.0186203
322	18	PTX	A	853.9	2.5	221	10.4	61	9.4	0.533	3	0.00752673
323	18	PTX	A	853.9	2.5	221	10.4	61	9.4	0.533	6	0.0655517
324	18	PTX	A	853.9	2.5	221	10.4	61	9.4	0.533	6	0.0418323
325	18	PTX	A	853.9	2.5	221	10.4	61	9.4	0.533	6	0.0229483
326	18	PTX	A	853.9	2.5	221	10.4	61	9.4	0.533	9	0.0729938
327	18	PTX	A	853.9	2.5	221	10.4	61	9.4	0.533	9	0.0714517
328	18	PTX	A	853.9	2.5	221	10.4	61	9.4	0.533	9	0.0944447
329	18	PTX	A	853.9	2.5	221	10.4	61	9.4	0.533	12	0.137655
330	18	PTX	A	853.9	2.5	221	10.4	61	9.4	0.533	12	0.0830029
331	18	PTX	A	853.9	2.5	221	10.4	61	9.4	0.533	12	0.123169
332	18	PTX	A	853.9	2.5	221	10.4	61	9.4	0.533	15	0.13861
333	18	PTX	A	853.9	2.5	221	10.4	61	9.4	0.533	15	0.207102
334	18	PTX	A	853.9	2.5	221	10.4	61	9.4	0.533	15	0.171841
335	18	PTX	A	853.9	2.5	221	10.4	61	9.4	0.533	18	0.190755
336	18	PTX	A	853.9	2.5	221	10.4	61	9.4	0.533	18	0.230005
337	18	PTX	A	853.9	2.5	221	10.4	61	9.4	0.533	18	0.252969
338	18	PTX	A	853.9	2.5	221	10.4	61	9.4	0.533	21	0.273206
339	18	PTX	A	853.9	2.5	221	10.4	61	9.4	0.533	21	0.158151
340	18	PTX	A	853.9	2.5	221	10.4	61	9.4	0.533	21	0.226722
341	18	PTX	A	853.9	2.5	221	10.4	61	9.4	0.533	28	0.317759
342	18	PTX	A	853.9	2.5	221	10.4	61	9.4	0.533	28	0.299741
343	18	PTX	A	853.9	2.5	221	10.4	61	9.4	0.533	28	0.314347
344	18	PTX	A	853.9	2.5	221	10.4	61	9.4	0.533	35	0.719566
345	18	PTX	A	853.9	2.5	221	10.4	61	9.4	0.533	35	0.558535
346	18	PTX	A	853.9	2.5	221	10.4	61	9.4	0.533	35	0.476233
347	17	PTX	A	853.9	2.5	221	10.4	64.5	10.46	0.526	0	0.0146451
348	17	PTX	A	853.9	2.5	221	10.4	64.5	10.46	0.526	0	0.0137008
349	17	PTX	A	853.9	2.5	221	10.4	64.5	10.46	0.526	0	0.00149658
350	17	PTX	A	853.9	2.5	221	10.4	64.5	10.46	0.526	0	0.0285508
351	17	PTX	A	853.9	2.5	221	10.4	64.5	10.46	0.526	0	-0.030181
352	17	PTX	A	853.9	2.5	221	10.4	64.5	10.46	0.526	0	-0.0282123
353	17	PTX	A	853.9	2.5	221	10.4	64.5	10.46	0.526	0.0833333	0.0233841
354	17	PTX	A	853.9	2.5	221	10.4	64.5	10.46	0.526	0.0833333	0.016017
355	17	PTX	A	853.9	2.5	221	10.4	64.5	10.46	0.526	0.0833333	-0.00520239
356	17	PTX	A	853.9	2.5	221	10.4	64.5	10.46	0.526	0.166667	0.00124715
357	17	PTX	A	853.9	2.5	221	10.4	64.5	10.46	0.526	0.166667	0.0264396
358	17	PTX	A	853.9	2.5	221	10.4	64.5	10.46	0.526	0.166667	-0.049396
359	17	PTX	A	853.9	2.5	221	10.4	64.5	10.46	0.526	1	0.0214153
360	17	PTX	A	853.9	2.5	221	10.4	64.5	10.46	0.526	1	-0.0137008
361	17	PTX	A	853.9	2.5	221	10.4	64.5	10.46	0.526	1	-0.00649408
362	17	PTX	A	853.9	2.5	221	10.4	64.5	10.46	0.526	3	0.036782
363	17	PTX	A	853.9	2.5	221	10.4	64.5	10.46	0.526	3	0.0456813
364	17	PTX	A	853.9	2.5	221	10.4	64.5	10.46	0.526	3	0.0420735
365	17	PTX	A	853.9	2.5	221	10.4	64.5	10.46	0.526	6	0.0968946
366	17	PTX	A	853.9	2.5	221	10.4	64.5	10.46	0.526	6	0.11088
367	17	PTX	A	853.9	2.5	221	10.4	64.5	10.46	0.526	6	0.102427
368	17	PTX	A	853.9	2.5	221	10.4	64.5	10.46	0.526	9	0.22813
369	17	PTX	A	853.9	2.5	221	10.4	64.5	10.46	0.526	9	0.153257
370	17	PTX	A	853.9	2.5	221	10.4	64.5	10.46	0.526	9	0.143903
371	17	PTX	A	853.9	2.5	221	10.4	64.5	10.46	0.526	12	0.306113
372	17	PTX	A	853.9	2.5	221	10.4	64.5	10.46	0.526	12	0.275433
373	17	PTX	A	853.9	2.5	221	10.4	64.5	10.46	0.526	12	0.246125
374	17	PTX	A	853.9	2.5	221	10.4	64.5	10.46	0.526	15	0.424245
375	17	PTX	A	853.9	2.5	221	10.4	64.5	10.46	0.526	15	0.307119
376	17	PTX	A	853.9	2.5	221	10.4	64.5	10.46	0.526	15	0.246196
377	17	PTX	A	853.9	2.5	221	10.4	64.5	10.46	0.526	18	0.448172
378	17	PTX	A	853.9	2.5	221	10.4	64.5	10.46	0.526	18	0.379392
379	17	PTX	A	853.9	2.5	221	10.4	64.5	10.46	0.526	18	0.227409
380	17	PTX	A	853.9	2.5	221	10.4	64.5	10.46	0.526	21	0.398794
381	17	PTX	A	853.9	2.5	221	10.4	64.5	10.46	0.526	21	0.340659
382	17	PTX	A	853.9	2.5	221	10.4	64.5	10.46	0.526	21	0.430863
383	17	PTX	A	853.9	2.5	221	10.4	64.5	10.46	0.526	28	0.511625
384	17	PTX	A	853.9	2.5	221	10.4	64.5	10.46	0.526	28	0.55989
385	17	PTX	A	853.9	2.5	221	10.4	64.5	10.46	0.526	28	0.587933
386	17	PTX	A	853.9	2.5	221	10.4	64.5	10.46	0.526	35	0.614898
387	17	PTX	A	853.9	2.5	221	10.4	64.5	10.46	0.526	35	0.569261
388	17	PTX	A	853.9	2.5	221	10.4	64.5	10.46	0.526	35	0.536648
389	13	PTX	A	853.9	2.5	221	10.4	43	19.8	1.41296	0	0.0236257
390	13	PTX	A	853.9	2.5	221	10.4	43	19.8	1.41296	0	-0.00284975
391	13	PTX	A	853.9	2.5	221	10.4	43	19.8	1.41296	0	-0.00996003
392	13	PTX	A	853.9	2.5	221	10.4	43	19.8	1.41296	0	-0.0236915
393	13	PTX	A	853.9	2.5	221	10.4	43	19.8	1.41296	0	0.0128756
394	13	PTX	A	853.9	2.5	221	10.4	43	19.8	1.41296	1	0.179506
395	13	PTX	A	853.9	2.5	221	10.4	43	19.8	1.41296	1	0.0750905
396	13	PTX	A	853.9	2.5	221	10.4	43	19.8	1.41296	1	0.219158
397	13	PTX	A	853.9	2.5	221	10.4	43	19.8	1.41296	3	0.433388
398	13	PTX	A	853.9	2.5	221	10.4	43	19.8	1.41296	3	0.414719
399	13	PTX	A	853.9	2.5	221	10.4	43	19.8	1.41296	3	0.356022
400	13	PTX	A	853.9	2.5	221	10.4	43	19.8	1.41296	4	0.728521
401	13	PTX	A	853.9	2.5	221	10.4	43	19.8	1.41296	4	0.596351
402	13	PTX	A	853.9	2.5	221	10.4	43	19.8	1.41296	4	0.391827
403	13	PTX	A	853.9	2.5	221	10.4	43	19.8	1.41296	5	0.452471
404	13	PTX	A	853.9	2.5	221	10.4	43	19.8	1.41296	5	0.586428
405	13	PTX	A	853.9	2.5	221	10.4	43	19.8	1.41296	5	0.435401
406	13	PTX	A	853.9	2.5	221	10.4	43	19.8	1.41296	6	0.745695
407	13	PTX	A	853.9	2.5	221	10.4	43	19.8	1.41296	6	0.891258
408	13	PTX	A	853.9	2.5	221	10.4	43	19.8	1.41296	6	0.78087
409	13	PTX	A	853.9	2.5	221	10.4	43	19.8	1.41296	6	0.964994
410	13	PTX	A	853.9	2.5	221	10.4	43	19.8	1.41296	6	0.953962
411	13	PTX	A	853.9	2.5	221	10.4	43	19.8	1.41296	6	0.927957
412	13	PTX	A	853.9	2.5	221	10.4	43	19.8	1.41296	6	0.972622
413	13	PTX	A	853.9	2.5	221	10.4	43	19.8	1.41296	6	0.98355
414	13	PTX	A	853.9	2.5	221	10.4	43	19.8	1.41296	6	0.874028
415	13	PTX	A	853.9	2.5	221	10.4	43	19.8	1.41296	6	0.840376
416	13	PTX	A	853.9	2.5	221	10.4	43	19.8	1.41296	6	0.831592
417	13	PTX	A	853.9	2.5	221	10.4	43	19.8	1.41296	6	0.850957
418	13	PTX	A	853.9	2.5	221	10.4	43	19.8	1.41296	6	0.787651
419	13	PTX	A	853.9	2.5	221	10.4	43	19.8	1.41296	6	0.930524
420	13	PTX	A	853.9	2.5	221	10.4	43	19.8	1.41296	6	0.949485
421	13	PTX	A	853.9	2.5	221	10.4	43	19.8	1.41296	6	0.9396
422	13	PTX	A	853.9	2.5	221	10.4	43	19.8	1.41296	6	0.958815
423	13	PTX	A	853.9	2.5	221	10.4	43	19.8	1.41296	6	0.771418
424	14	PTX	A	853.9	2.5	221	10.4	52	19.3	0.739	0	-0.0198771
425	14	PTX	A	853.9	2.5	221	10.4	52	19.3	0.739	0	0.0317418
426	14	PTX	A	853.9	2.5	221	10.4	52	19.3	0.739	0	0.00933581
427	14	PTX	A	853.9	2.5	221	10.4	52	19.3	0.739	0	-0.00685379
428	14	PTX	A	853.9	2.5	221	10.4	52	19.3	0.739	0	-0.00585647
429	14	PTX	A	853.9	2.5	221	10.4	52	19.3	0.739	0	-0.00849018
430	14	PTX	A	853.9	2.5	221	10.4	52	19.3	0.739	1	0.00241263
431	14	PTX	A	853.9	2.5	221	10.4	52	19.3	0.739	1	-0.00744444
432	14	PTX	A	853.9	2.5	221	10.4	52	19.3	0.739	1	-0.0020124
433	14	PTX	A	853.9	2.5	221	10.4	52	19.3	0.739	3	0.0656896
434	14	PTX	A	853.9	2.5	221	10.4	52	19.3	0.739	3	0.0896835
435	14	PTX	A	853.9	2.5	221	10.4	52	19.3	0.739	3	0.061768
436	14	PTX	A	853.9	2.5	221	10.4	52	19.3	0.739	6	0.154926
437	14	PTX	A	853.9	2.5	221	10.4	52	19.3	0.739	6	0.233996
438	14	PTX	A	853.9	2.5	221	10.4	52	19.3	0.739	6	0.103307
439	14	PTX	A	853.9	2.5	221	10.4	52	19.3	0.739	9	0.183306
440	14	PTX	A	853.9	2.5	221	10.4	52	19.3	0.739	9	0.55391
441	14	PTX	A	853.9	2.5	221	10.4	52	19.3	0.739	9	0.249062
442	14	PTX	A	853.9	2.5	221	10.4	52	19.3	0.739	12	0.408121
443	14	PTX	A	853.9	2.5	221	10.4	52	19.3	0.739	12	0.536263
444	14	PTX	A	853.9	2.5	221	10.4	52	19.3	0.739	12	0.305096
445	14	PTX	A	853.9	2.5	221	10.4	52	19.3	0.739	15	0.479057
446	14	PTX	A	853.9	2.5	221	10.4	52	19.3	0.739	15	0.417107
447	14	PTX	A	853.9	2.5	221	10.4	52	19.3	0.739	15	0.560964
448	14	PTX	A	853.9	2.5	221	10.4	52	19.3	0.739	18	0.580319
449	14	PTX	A	853.9	2.5	221	10.4	52	19.3	0.739	18	0.44295
450	14	PTX	A	853.9	2.5	221	10.4	52	19.3	0.739	18	0.625431
451	14	PTX	A	853.9	2.5	221	10.4	52	19.3	0.739	21	0.706254
452	14	PTX	A	853.9	2.5	221	10.4	52	19.3	0.739	21	0.634223
453	14	PTX	A	853.9	2.5	221	10.4	52	19.3	0.739	21	0.750891
454	14	PTX	A	853.9	2.5	221	10.4	52	19.3	0.739	28	0.829661
455	14	PTX	A	853.9	2.5	221	10.4	52	19.3	0.739	28	0.739746
456	14	PTX	A	853.9	2.5	221	10.4	52	19.3	0.739	28	0.94323
457	14	PTX	A	853.9	2.5	221	10.4	52	19.3	0.739	35	0.828789
458	14	PTX	A	853.9	2.5	221	10.4	52	19.3	0.739	35	0.970216
459	14	PTX	A	853.9	2.5	221	10.4	52	19.3	0.739	35	0.966478
460	15	PTX	A	853.9	2.5	221	10.4	52	19.9	0.737	0	-0.0255931
461	15	PTX	A	853.9	2.5	221	10.4	52	19.9	0.737	0	-0.0123219
462	15	PTX	A	853.9	2.5	221	10.4	52	19.9	0.737	0	0.0116672
463	15	PTX	A	853.9	2.5	221	10.4	52	19.9	0.737	0	0.0329909
464	15	PTX	A	853.9	2.5	221	10.4	52	19.9	0.737	0	0.00880536
465	15	PTX	A	853.9	2.5	221	10.4	52	19.9	0.737	0	-0.0155485
466	15	PTX	A	853.9	2.5	221	10.4	52	19.9	0.737	1	-0.02376
467	15	PTX	A	853.9	2.5	221	10.4	52	19.9	0.737	1	0.0389578
468	15	PTX	A	853.9	2.5	221	10.4	52	19.9	0.737	1	0.0150154
469	15	PTX	A	853.9	2.5	221	10.4	52	19.9	0.737	3	0.0800058
470	15	PTX	A	853.9	2.5	221	10.4	52	19.9	0.737	3	0.0893396
471	15	PTX	A	853.9	2.5	221	10.4	52	19.9	0.737	3	0.0575037
472	15	PTX	A	853.9	2.5	221	10.4	52	19.9	0.737	6	0.25991
473	15	PTX	A	853.9	2.5	221	10.4	52	19.9	0.737	6	0.338817
474	15	PTX	A	853.9	2.5	221	10.4	52	19.9	0.737	6	0.0914158
475	15	PTX	A	853.9	2.5	221	10.4	52	19.9	0.737	9	0.424748
476	15	PTX	A	853.9	2.5	221	10.4	52	19.9	0.737	9	0.132286
477	15	PTX	A	853.9	2.5	221	10.4	52	19.9	0.737	9	0.356549
478	15	PTX	A	853.9	2.5	221	10.4	52	19.9	0.737	12	0.509939
479	15	PTX	A	853.9	2.5	221	10.4	52	19.9	0.737	12	0.307121
480	15	PTX	A	853.9	2.5	221	10.4	52	19.9	0.737	12	0.418706
481	15	PTX	A	853.9	2.5	221	10.4	52	19.9	0.737	15	0.637002
482	15	PTX	A	853.9	2.5	221	10.4	52	19.9	0.737	15	0.941706
483	15	PTX	A	853.9	2.5	221	10.4	52	19.9	0.737	15	0.393931
484	15	PTX	A	853.9	2.5	221	10.4	52	19.9	0.737	18	0.846797
485	15	PTX	A	853.9	2.5	221	10.4	52	19.9	0.737	18	0.914902
486	15	PTX	A	853.9	2.5	221	10.4	52	19.9	0.737	18	0.785155
487	15	PTX	A	853.9	2.5	221	10.4	52	19.9	0.737	21	0.661291
488	15	PTX	A	853.9	2.5	221	10.4	52	19.9	0.737	21	0.692341
489	15	PTX	A	853.9	2.5	221	10.4	52	19.9	0.737	21	0.718687
490	15	PTX	A	853.9	2.5	221	10.4	52	19.9	0.737	28	0.924385
491	15	PTX	A	853.9	2.5	221	10.4	52	19.9	0.737	28	0.730639
492	15	PTX	A	853.9	2.5	221	10.4	52	19.9	0.737	28	0.920485
493	15	PTX	A	853.9	2.5	221	10.4	52	19.9	0.737	35	0.988108
494	15	PTX	A	853.9	2.5	221	10.4	52	19.9	0.737	35	0.961931
495	15	PTX	A	853.9	2.5	221	10.4	52	19.9	0.737	35	0.854358
496	16	PTX	A	853.9	2.5	221	10.4	61	18.4	0.499	0	0.0191541
497	16	PTX	A	853.9	2.5	221	10.4	61	18.4	0.499	0	0.0140027
498	16	PTX	A	853.9	2.5	221	10.4	61	18.4	0.499	0	-0.00304643
499	16	PTX	A	853.9	2.5	221	10.4	61	18.4	0.499	0	0.0158215
500	16	PTX	A	853.9	2.5	221	10.4	61	18.4	0.499	0	-0.0276956
501	16	PTX	A	853.9	2.5	221	10.4	61	18.4	0.499	0	-0.0182363
502	16	PTX	A	853.9	2.5	221	10.4	61	18.4	0.499	0.0833333	0.00266372
503	16	PTX	A	853.9	2.5	221	10.4	61	18.4	0.499	0.0833333	0.010345
504	16	PTX	A	853.9	2.5	221	10.4	61	18.4	0.499	0.0833333	-0.00175606
505	16	PTX	A	853.9	2.5	221	10.4	61	18.4	0.499	0.166667	-0.0195063
506	16	PTX	A	853.9	2.5	221	10.4	61	18.4	0.499	0.166667	0.0131798
507	16	PTX	A	853.9	2.5	221	10.4	61	18.4	0.499	0.166667	0.00911559
508	16	PTX	A	853.9	2.5	221	10.4	61	18.4	0.499	1	-0.0424993
509	16	PTX	A	853.9	2.5	221	10.4	61	18.4	0.499	1	-0.0458827
510	16	PTX	A	853.9	2.5	221	10.4	61	18.4	0.499	1	-0.0380491
511	16	PTX	A	853.9	2.5	221	10.4	61	18.4	0.499	3	0.0183717
512	16	PTX	A	853.9	2.5	221	10.4	61	18.4	0.499	3	0.0166648
513	16	PTX	A	853.9	2.5	221	10.4	61	18.4	0.499	3	0.00689046
514	16	PTX	A	853.9	2.5	221	10.4	61	18.4	0.499	6	0.027892
515	16	PTX	A	853.9	2.5	221	10.4	61	18.4	0.499	6	0.0206375
516	16	PTX	A	853.9	2.5	221	10.4	61	18.4	0.499	6	0.0557621
517	16	PTX	A	853.9	2.5	221	10.4	61	18.4	0.499	9	0.0855118
518	16	PTX	A	853.9	2.5	221	10.4	61	18.4	0.499	9	0.089393
519	16	PTX	A	853.9	2.5	221	10.4	61	18.4	0.499	9	0.0687369
520	16	PTX	A	853.9	2.5	221	10.4	61	18.4	0.499	12	0.112142
521	16	PTX	A	853.9	2.5	221	10.4	61	18.4	0.499	12	0.131488
522	16	PTX	A	853.9	2.5	221	10.4	61	18.4	0.499	12	0.106402
523	16	PTX	A	853.9	2.5	221	10.4	61	18.4	0.499	15	0.175574
524	16	PTX	A	853.9	2.5	221	10.4	61	18.4	0.499	15	0.102561
525	16	PTX	A	853.9	2.5	221	10.4	61	18.4	0.499	15	0.0849021
526	16	PTX	A	853.9	2.5	221	10.4	61	18.4	0.499	18	0.20197
527	16	PTX	A	853.9	2.5	221	10.4	61	18.4	0.499	18	0.203535
528	16	PTX	A	853.9	2.5	221	10.4	61	18.4	0.499	18	0.195122
529	16	PTX	A	853.9	2.5	221	10.4	61	18.4	0.499	21	0.298992
530	16	PTX	A	853.9	2.5	221	10.4	61	18.4	0.499	21	0.191698
531	16	PTX	A	853.9	2.5	221	10.4	61	18.4	0.499	21	0.217607
532	16	PTX	A	853.9	2.5	221	10.4	61	18.4	0.499	28	0.359416
533	16	PTX	A	853.9	2.5	221	10.4	61	18.4	0.499	28	0.305241
534	16	PTX	A	853.9	2.5	221	10.4	61	18.4	0.499	28	0.296706
535	16	PTX	A	853.9	2.5	221	10.4	61	18.4	0.499	35	0.507352
536	16	PTX	A	853.9	2.5	221	10.4	61	18.4	0.499	35	0.468234
537	16	PTX	A	853.9	2.5	221	10.4	61	18.4	0.499	35	0.392326
538	19	PTX	A	853.9	2.5	221	10.4	61	27.7	0.876	0	0.024703
539	19	PTX	A	853.9	2.5	221	10.4	61	27.7	0.876	0	0.0223721
540	19	PTX	A	853.9	2.5	221	10.4	61	27.7	0.876	0	-0.00140088
541	19	PTX	A	853.9	2.5	221	10.4	61	27.7	0.876	0	-0.00965482
542	19	PTX	A	853.9	2.5	221	10.4	61	27.7	0.876	0	-0.0342048
543	19	PTX	A	853.9	2.5	221	10.4	61	27.7	0.876	0	-0.00181459
544	19	PTX	A	853.9	2.5	221	10.4	61	27.7	0.876	0.0833333	0.0104755
545	19	PTX	A	853.9	2.5	221	10.4	61	27.7	0.876	0.0833333	0.0131696
546	19	PTX	A	853.9	2.5	221	10.4	61	27.7	0.876	0.0833333	-0.027313
547	19	PTX	A	853.9	2.5	221	10.4	61	27.7	0.876	0.166667	0.0179929
548	19	PTX	A	853.9	2.5	221	10.4	61	27.7	0.876	0.166667	-0.00731385
549	19	PTX	A	853.9	2.5	221	10.4	61	27.7	0.876	0.166667	-0.0237007
550	19	PTX	A	853.9	2.5	221	10.4	61	27.7	0.876	1	-0.0377868
551	19	PTX	A	853.9	2.5	221	10.4	61	27.7	0.876	1	-0.0435182
552	19	PTX	A	853.9	2.5	221	10.4	61	27.7	0.876	1	-0.0249418
553	19	PTX	A	853.9	2.5	221	10.4	61	27.7	0.876	3	-0.00840362
554	19	PTX	A	853.9	2.5	221	10.4	61	27.7	0.876	3	0.0200513
555	19	PTX	A	853.9	2.5	221	10.4	61	27.7	0.876	3	-0.000169855
556	19	PTX	A	853.9	2.5	221	10.4	61	27.7	0.876	6	0.0200917
557	19	PTX	A	853.9	2.5	221	10.4	61	27.7	0.876	6	-0.00249065
558	19	PTX	A	853.9	2.5	221	10.4	61	27.7	0.876	6	-0.00255119
559	19	PTX	A	853.9	2.5	221	10.4	61	27.7	0.876	9	0.0700088
560	19	PTX	A	853.9	2.5	221	10.4	61	27.7	0.876	9	0.0447122
561	19	PTX	A	853.9	2.5	221	10.4	61	27.7	0.876	9	0.0216254
562	19	PTX	A	853.9	2.5	221	10.4	61	27.7	0.876	12	0.0741863
563	19	PTX	A	853.9	2.5	221	10.4	61	27.7	0.876	12	0.044692
564	19	PTX	A	853.9	2.5	221	10.4	61	27.7	0.876	12	0.0828236
565	19	PTX	A	853.9	2.5	221	10.4	61	27.7	0.876	15	0.121329
566	19	PTX	A	853.9	2.5	221	10.4	61	27.7	0.876	15	0.180246
567	19	PTX	A	853.9	2.5	221	10.4	61	27.7	0.876	15	0.116384
568	19	PTX	A	853.9	2.5	221	10.4	61	27.7	0.876	18	0.178006
569	19	PTX	A	853.9	2.5	221	10.4	61	27.7	0.876	18	0.190085
570	19	PTX	A	853.9	2.5	221	10.4	61	27.7	0.876	18	0.138866
571	19	PTX	A	853.9	2.5	221	10.4	61	27.7	0.876	21	0.215169
572	19	PTX	A	853.9	2.5	221	10.4	61	27.7	0.876	21	0.192163
573	19	PTX	A	853.9	2.5	221	10.4	61	27.7	0.876	21	0.230002
574	19	PTX	A	853.9	2.5	221	10.4	61	27.7	0.876	28	0.362176
575	19	PTX	A	853.9	2.5	221	10.4	61	27.7	0.876	28	0.263775
576	19	PTX	A	853.9	2.5	221	10.4	61	27.7	0.876	28	0.240506
577	19	PTX	A	853.9	2.5	221	10.4	61	27.7	0.876	35	0.772038
578	19	PTX	A	853.9	2.5	221	10.4	61	27.7	0.876	35	0.543571
579	19	PTX	A	853.9	2.5	221	10.4	61	27.7	0.876	35	0.36376
580	20	RESI	B	314.4	1.3	86.2	14.63	31	9.49	1.215	0	-0.0568422
581	20	RESI	B	314.4	1.3	86.2	14.63	31	9.49	1.215	0	0.0845222
582	20	RESI	B	314.4	1.3	86.2	14.63	31	9.49	1.215	0	0.129383
583	20	RESI	B	314.4	1.3	86.2	14.63	31	9.49	1.215	0	-0.0379609
584	20	RESI	B	314.4	1.3	86.2	14.63	31	9.49	1.215	0	-0.0382325
585	20	RESI	B	314.4	1.3	86.2	14.63	31	9.49	1.215	0	-0.0808698
586	20	RESI	B	314.4	1.3	86.2	14.63	31	9.49	1.215	0.166667	0.140464
587	20	RESI	B	314.4	1.3	86.2	14.63	31	9.49	1.215	0.166667	0.0440548
588	20	RESI	B	314.4	1.3	86.2	14.63	31	9.49	1.215	0.166667	0.0864206
589	20	RESI	B	314.4	1.3	86.2	14.63	31	9.49	1.215	1	0.160289
590	20	RESI	B	314.4	1.3	86.2	14.63	31	9.49	1.215	1	0.103258
591	20	RESI	B	314.4	1.3	86.2	14.63	31	9.49	1.215	1	0.199124
592	20	RESI	B	314.4	1.3	86.2	14.63	31	9.49	1.215	3	0.411496
593	20	RESI	B	314.4	1.3	86.2	14.63	31	9.49	1.215	3	0.409595
594	20	RESI	B	314.4	1.3	86.2	14.63	31	9.49	1.215	3	0.480476
595	20	RESI	B	314.4	1.3	86.2	14.63	31	9.49	1.215	5	0.574713
596	20	RESI	B	314.4	1.3	86.2	14.63	31	9.49	1.215	5	0.90685
597	20	RESI	B	314.4	1.3	86.2	14.63	31	9.49	1.215	5	0.74662
598	20	RESI	B	314.4	1.3	86.2	14.63	31	9.49	1.215	7	0.823321
599	20	RESI	B	314.4	1.3	86.2	14.63	31	9.49	1.215	7	0.897315
600	20	RESI	B	314.4	1.3	86.2	14.63	31	9.49	1.215	7	0.983334
601	20	RESI	B	314.4	1.3	86.2	14.63	31	9.49	1.215	14	0.970188
602	20	RESI	B	314.4	1.3	86.2	14.63	31	9.49	1.215	14	0.990271
603	20	RESI	B	314.4	1.3	86.2	14.63	31	9.49	1.215	14	0.999218
604	20	RESI	B	314.4	1.3	86.2	14.63	31	9.49	1.215	21	0.96685
605	20	RESI	B	314.4	1.3	86.2	14.63	31	9.49	1.215	21	0.96998
606	20	RESI	B	314.4	1.3	86.2	14.63	31	9.49	1.215	21	0.985133
607	21	RESI	B	314.4	1.3	86.2	14.63	43.5	8.05	2.57	0	-0.0323238
608	21	RESI	B	314.4	1.3	86.2	14.63	43.5	8.05	2.57	0	-0.00159692
609	21	RESI	B	314.4	1.3	86.2	14.63	43.5	8.05	2.57	0	-0.0663546
610	21	RESI	B	314.4	1.3	86.2	14.63	43.5	8.05	2.57	0	-0.117566
611	21	RESI	B	314.4	1.3	86.2	14.63	43.5	8.05	2.57	0	0.0129405
612	21	RESI	B	314.4	1.3	86.2	14.63	43.5	8.05	2.57	0	0.176817
613	21	RESI	B	314.4	1.3	86.2	14.63	43.5	8.05	2.57	0.166667	0.0654736
614	21	RESI	B	314.4	1.3	86.2	14.63	43.5	8.05	2.57	0.166667	0.0363987
615	21	RESI	B	314.4	1.3	86.2	14.63	43.5	8.05	2.57	0.166667	0.0446586
616	21	RESI	B	314.4	1.3	86.2	14.63	43.5	8.05	2.57	1	0.215474
617	21	RESI	B	314.4	1.3	86.2	14.63	43.5	8.05	2.57	1	0.177478
618	21	RESI	B	314.4	1.3	86.2	14.63	43.5	8.05	2.57	1	0.0938877
619	21	RESI	B	314.4	1.3	86.2	14.63	43.5	8.05	2.57	2	0.178139
620	21	RESI	B	314.4	1.3	86.2	14.63	43.5	8.05	2.57	2	0.218117
621	21	RESI	B	314.4	1.3	86.2	14.63	43.5	8.05	2.57	2	0.248844
622	21	RESI	B	314.4	1.3	86.2	14.63	43.5	8.05	2.57	3	0.296751
623	21	RESI	B	314.4	1.3	86.2	14.63	43.5	8.05	2.57	3	0.191355
624	21	RESI	B	314.4	1.3	86.2	14.63	43.5	8.05	2.57	3	0.246861
625	21	RESI	B	314.4	1.3	86.2	14.63	43.5	8.05	2.57	5	0.361178
626	21	RESI	B	314.4	1.3	86.2	14.63	43.5	8.05	2.57	5	0.190694
627	21	RESI	B	314.4	1.3	86.2	14.63	43.5	8.05	2.57	5	0.453029
628	21	RESI	B	314.4	1.3	86.2	14.63	43.5	8.05	2.57	7	0.381002
629	21	RESI	B	314.4	1.3	86.2	14.63	43.5	8.05	2.57	7	0.414703
630	21	RESI	B	314.4	1.3	86.2	14.63	43.5	8.05	2.57	7	0.286839
631	21	RESI	B	314.4	1.3	86.2	14.63	43.5	8.05	2.57	10	0.555121
632	21	RESI	B	314.4	1.3	86.2	14.63	43.5	8.05	2.57	10	0.324835
633	21	RESI	B	314.4	1.3	86.2	14.63	43.5	8.05	2.57	10	0.578579
634	21	RESI	B	314.4	1.3	86.2	14.63	43.5	8.05	2.57	14	0.956107
635	21	RESI	B	314.4	1.3	86.2	14.63	43.5	8.05	2.57	14	0.966845
636	21	RESI	B	314.4	1.3	86.2	14.63	43.5	8.05	2.57	14	0.975006
637	21	RESI	B	314.4	1.3	86.2	14.63	43.5	8.05	2.57	17	0.961063
638	21	RESI	B	314.4	1.3	86.2	14.63	43.5	8.05	2.57	17	0.973717
639	21	RESI	B	314.4	1.3	86.2	14.63	43.5	8.05	2.57	17	0.985347
640	22	RESI	B	314.4	1.3	86.2	14.63	49	8.4	1.80507	0	-0.108912
641	22	RESI	B	314.4	1.3	86.2	14.63	49	8.4	1.80507	0	-0.0305699
642	22	RESI	B	314.4	1.3	86.2	14.63	49	8.4	1.80507	0	-0.0510881
643	22	RESI	B	314.4	1.3	86.2	14.63	49	8.4	1.80507	0	0.0881865
644	22	RESI	B	314.4	1.3	86.2	14.63	49	8.4	1.80507	0	0.0829016
645	22	RESI	B	314.4	1.3	86.2	14.63	49	8.4	1.80507	0	0.0194819
646	22	RESI	B	314.4	1.3	86.2	14.63	49	8.4	1.80507	0.166667	0.146943
647	22	RESI	B	314.4	1.3	86.2	14.63	49	8.4	1.80507	0.166667	0.126736
648	22	RESI	B	314.4	1.3	86.2	14.63	49	8.4	1.80507	0.166667	0.145389
649	22	RESI	B	314.4	1.3	86.2	14.63	49	8.4	1.80507	1	0.181451
650	22	RESI	B	314.4	1.3	86.2	14.63	49	8.4	1.80507	1	0.136995
651	22	RESI	B	314.4	1.3	86.2	14.63	49	8.4	1.80507	3	0.127358
652	22	RESI	B	314.4	1.3	86.2	14.63	49	8.4	1.80507	3	0.28715
653	22	RESI	B	314.4	1.3	86.2	14.63	49	8.4	1.80507	3	0.209119
654	22	RESI	B	314.4	1.3	86.2	14.63	49	8.4	1.80507	7	0.287772
655	22	RESI	B	314.4	1.3	86.2	14.63	49	8.4	1.80507	7	0.273782
656	22	RESI	B	314.4	1.3	86.2	14.63	49	8.4	1.80507	7	0.370777
657	22	RESI	B	314.4	1.3	86.2	14.63	49	8.4	1.80507	14	0.464974
658	22	RESI	B	314.4	1.3	86.2	14.63	49	8.4	1.80507	14	0.385389
659	22	RESI	B	314.4	1.3	86.2	14.63	49	8.4	1.80507	14	0.316373
660	22	RESI	B	314.4	1.3	86.2	14.63	49	8.4	1.80507	21	0.584041
661	22	RESI	B	314.4	1.3	86.2	14.63	49	8.4	1.80507	21	0.740415
662	22	RESI	B	314.4	1.3	86.2	14.63	49	8.4	1.80507	21	0.790155
663	22	RESI	B	314.4	1.3	86.2	14.63	49	8.4	1.80507	28	0.868808
664	22	RESI	B	314.4	1.3	86.2	14.63	49	8.4	1.80507	28	0.759378
665	22	RESI	B	314.4	1.3	86.2	14.63	49	8.4	1.80507	28	0.757824
666	24	RESI	A	314.4	1.3	86.2	14.63	59	8.38	0.375	0	0.0757361
667	24	RESI	A	314.4	1.3	86.2	14.63	59	8.38	0.375	0	0.0133837
668	24	RESI	A	314.4	1.3	86.2	14.63	59	8.38	0.375	0	-0.00740041
669	24	RESI	A	314.4	1.3	86.2	14.63	59	8.38	0.375	0	-0.0392064
670	24	RESI	A	314.4	1.3	86.2	14.63	59	8.38	0.375	0	-0.0499134
671	24	RESI	A	314.4	1.3	86.2	14.63	59	8.38	0.375	0	0.00740041
672	24	RESI	A	314.4	1.3	86.2	14.63	59	8.38	0.375	1	0.0688081
673	24	RESI	A	314.4	1.3	86.2	14.63	59	8.38	0.375	1	-0.0489687
674	24	RESI	A	314.4	1.3	86.2	14.63	59	8.38	0.375	1	0.0316486
675	24	RESI	A	314.4	1.3	86.2	14.63	59	8.38	0.375	7	0.158873
676	24	RESI	A	314.4	1.3	86.2	14.63	59	8.38	0.375	7	0.0307038
677	24	RESI	A	314.4	1.3	86.2	14.63	59	8.38	0.375	14	0.126122
678	24	RESI	A	314.4	1.3	86.2	14.63	59	8.38	0.375	14	0.110376
679	24	RESI	A	314.4	1.3	86.2	14.63	59	8.38	0.375	14	0.0354275
680	24	RESI	A	314.4	1.3	86.2	14.63	59	8.38	0.375	21	0.209573
681	24	RESI	A	314.4	1.3	86.2	14.63	59	8.38	0.375	21	0.145331
682	24	RESI	A	314.4	1.3	86.2	14.63	59	8.38	0.375	21	0.0439301
683	24	RESI	A	314.4	1.3	86.2	14.63	59	8.38	0.375	28	0.23823
684	24	RESI	A	314.4	1.3	86.2	14.63	59	8.38	0.375	28	-0.0782554
685	24	RESI	A	314.4	1.3	86.2	14.63	59	8.38	0.375	35	0.180916
686	24	RESI	A	314.4	1.3	86.2	14.63	59	8.38	0.375	35	0.207684
687	24	RESI	A	314.4	1.3	86.2	14.63	59	8.38	0.375	35	0.164226
688	24	RESI	A	314.4	1.3	86.2	14.63	59	8.38	0.375	42	0.15163
689	24	RESI	A	314.4	1.3	86.2	14.63	59	8.38	0.375	42	0.265942
690	24	RESI	A	314.4	1.3	86.2	14.63	59	8.38	0.375	42	0.112266
691	24	RESI	A	314.4	1.3	86.2	14.63	59	8.38	0.375	56	0.230987
692	24	RESI	A	314.4	1.3	86.2	14.63	59	8.38	0.375	56	0.199496
693	24	RESI	A	314.4	1.3	86.2	14.63	59	8.38	0.375	56	0.212722
694	24	RESI	A	314.4	1.3	86.2	14.63	59	8.38	0.375	63	0.234766
695	24	RESI	A	314.4	1.3	86.2	14.63	59	8.38	0.375	63	0.299638
696	24	RESI	A	314.4	1.3	86.2	14.63	59	8.38	0.375	63	0.11573
697	23	RESI	B	314.4	1.3	86.2	14.63	60	8.88	0.901	0	-0.0892451
698	23	RESI	B	314.4	1.3	86.2	14.63	60	8.88	0.901	0	0.0942576
699	23	RESI	B	314.4	1.3	86.2	14.63	60	8.88	0.901	0	-0.0233314
700	23	RESI	B	314.4	1.3	86.2	14.63	60	8.88	0.901	0	0.122746
701	23	RESI	B	314.4	1.3	86.2	14.63	60	8.88	0.901	0	-0.156248
702	23	RESI	B	314.4	1.3	86.2	14.63	60	8.88	0.901	0	0.117616
703	23	RESI	B	314.4	1.3	86.2	14.63	60	8.88	0.901	0.166667	0.0447339
704	23	RESI	B	314.4	1.3	86.2	14.63	60	8.88	0.901	0.166667	0.129389
705	23	RESI	B	314.4	1.3	86.2	14.63	60	8.88	0.901	0.166667	0.107408
706	23	RESI	B	314.4	1.3	86.2	14.63	60	8.88	0.901	1	0.045062
707	23	RESI	B	314.4	1.3	86.2	14.63	60	8.88	0.901	1	0.168806
708	23	RESI	B	314.4	1.3	86.2	14.63	60	8.88	0.901	1	0.093654
709	23	RESI	B	314.4	1.3	86.2	14.63	60	8.88	0.901	2	0.0554272
710	23	RESI	B	314.4	1.3	86.2	14.63	60	8.88	0.901	2	0.0592886
711	23	RESI	B	314.4	1.3	86.2	14.63	60	8.88	0.901	2	0.0904773
712	23	RESI	B	314.4	1.3	86.2	14.63	60	8.88	0.901	3	0.0996902
713	23	RESI	B	314.4	1.3	86.2	14.63	60	8.88	0.901	3	0.0990866
714	23	RESI	B	314.4	1.3	86.2	14.63	60	8.88	0.901	3	0.045062
715	23	RESI	B	314.4	1.3	86.2	14.63	60	8.88	0.901	7	0.183594
716	23	RESI	B	314.4	1.3	86.2	14.63	60	8.88	0.901	7	0.133795
717	23	RESI	B	314.4	1.3	86.2	14.63	60	8.88	0.901	7	0.151904
718	23	RESI	B	314.4	1.3	86.2	14.63	60	8.88	0.901	14	0.163373
719	23	RESI	B	314.4	1.3	86.2	14.63	60	8.88	0.901	14	0.198685
720	23	RESI	B	314.4	1.3	86.2	14.63	60	8.88	0.901	14	0.231281
721	23	RESI	B	314.4	1.3	86.2	14.63	60	8.88	0.901	21	0.099992
722	23	RESI	B	314.4	1.3	86.2	14.63	60	8.88	0.901	21	0.130475
723	23	RESI	B	314.4	1.3	86.2	14.63	60	8.88	0.901	21	0.0728288
724	23	RESI	B	314.4	1.3	86.2	14.63	60	8.88	0.901	28	0.00730741
725	23	RESI	B	314.4	1.3	86.2	14.63	60	8.88	0.901	28	0.0696849
726	23	RESI	B	314.4	1.3	86.2	14.63	60	8.88	0.901	28	0.119587
727	23	RESI	B	314.4	1.3	86.2	14.63	60	8.88	0.901	42	0.192955
728	23	RESI	B	314.4	1.3	86.2	14.63	60	8.88	0.901	42	0.12731
729	23	RESI	B	314.4	1.3	86.2	14.63	60	8.88	0.901	42	0.17038
730	23	RESI	B	314.4	1.3	86.2	14.63	60	8.88	0.901	56	0.166518
731	23	RESI	B	314.4	1.3	86.2	14.63	60	8.88	0.901	56	0.221173
732	23	RESI	B	314.4	1.3	86.2	14.63	60	8.88	0.901	56	0.164736
733	23	RESI	B	314.4	1.3	86.2	14.63	60	8.88	0.901	70	0.274936
734	23	RESI	B	314.4	1.3	86.2	14.63	60	8.88	0.901	70	0.219391
735	23	RESI	B	314.4	1.3	86.2	14.63	60	8.88	0.901	70	0.243154
736	25	RBC	B	434.5	2.2	91.2	5.5	45.5	10.1	4.828	0	-0.0427016
737	25	RBC	B	434.5	2.2	91.2	5.5	45.5	10.1	4.828	0	0.0522496
738	25	RBC	B	434.5	2.2	91.2	5.5	45.5	10.1	4.828	0	0.115081
739	25	RBC	B	434.5	2.2	91.2	5.5	45.5	10.1	4.828	0	0.0167823
740	25	RBC	B	434.5	2.2	91.2	5.5	45.5	10.1	4.828	0	-0.141411
741	25	RBC	B	434.5	2.2	91.2	5.5	45.5	10.1	4.828	0.083	0.160707
742	25	RBC	B	434.5	2.2	91.2	5.5	45.5	10.1	4.828	0.083	0.115081
743	25	RBC	B	434.5	2.2	91.2	5.5	45.5	10.1	4.828	0.25	0.224595
744	25	RBC	B	434.5	2.2	91.2	5.5	45.5	10.1	4.828	0.25	0.184488
745	25	RBC	B	434.5	2.2	91.2	5.5	45.5	10.1	4.828	0.5	0.163643
746	25	RBC	B	434.5	2.2	91.2	5.5	45.5	10.1	4.828	0.5	0.343797
747	25	RBC	B	434.5	2.2	91.2	5.5	45.5	10.1	4.828	0.5	0.320133
748	25	RBC	B	434.5	2.2	91.2	5.5	45.5	10.1	4.828	1	0.487134
749	25	RBC	B	434.5	2.2	91.2	5.5	45.5	10.1	4.828	1	0.783497
750	25	RBC	B	434.5	2.2	91.2	5.5	45.5	10.1	4.828	1	0.633349
751	25	RBC	B	434.5	2.2	91.2	5.5	45.5	10.1	4.828	1.5	0.907633
752	25	RBC	B	434.5	2.2	91.2	5.5	45.5	10.1	4.828	1.5	0.887609
753	25	RBC	B	434.5	2.2	91.2	5.5	45.5	10.1	4.828	1.5	0.89812
754	25	RBC	B	434.5	2.2	91.2	5.5	45.5	10.1	4.828	2	0.928126
755	25	RBC	B	434.5	2.2	91.2	5.5	45.5	10.1	4.828	2	0.949618
756	25	RBC	B	434.5	2.2	91.2	5.5	45.5	10.1	4.828	2	0.95226
757	25	RBC	B	434.5	2.2	91.2	5.5	45.5	10.1	4.828	2.5	0.974868
758	25	RBC	B	434.5	2.2	91.2	5.5	45.5	10.1	4.828	2.5	0.96007
759	25	RBC	B	434.5	2.2	91.2	5.5	45.5	10.1	4.828	2.5	0.983617
760	25	RBC	B	434.5	2.2	91.2	5.5	45.5	10.1	4.828	3	0.992249
761	25	RBC	B	434.5	2.2	91.2	5.5	45.5	10.1	4.828	3	0.998121
762	26	RBC	B	434.5	2.2	91.2	5.5	51.6	7.82	2.186	0	0.04628
763	26	RBC	B	434.5	2.2	91.2	5.5	51.6	7.82	2.186	0	-0.00387965
764	26	RBC	B	434.5	2.2	91.2	5.5	51.6	7.82	2.186	0	-0.0225608
765	26	RBC	B	434.5	2.2	91.2	5.5	51.6	7.82	2.186	0	-0.0198395
766	26	RBC	B	434.5	2.2	91.2	5.5	51.6	7.82	2.186	0	-0.000181319
767	26	RBC	B	434.5	2.2	91.2	5.5	51.6	7.82	2.186	0	0.0168627
768	26	RBC	B	434.5	2.2	91.2	5.5	51.6	7.82	2.186	0	-0.00395276
769	26	RBC	B	434.5	2.2	91.2	5.5	51.6	7.82	2.186	0	-0.013744
770	26	RBC	B	434.5	2.2	91.2	5.5	51.6	7.82	2.186	0	-0.0538518
771	26	RBC	B	434.5	2.2	91.2	5.5	51.6	7.82	2.186	0	0.0548672
772	26	RBC	B	434.5	2.2	91.2	5.5	51.6	7.82	2.186	1	0.103098
773	26	RBC	B	434.5	2.2	91.2	5.5	51.6	7.82	2.186	1	0.232923
774	26	RBC	B	434.5	2.2	91.2	5.5	51.6	7.82	2.186	1	0.186868
775	26	RBC	B	434.5	2.2	91.2	5.5	51.6	7.82	2.186	2	0.106736
776	26	RBC	B	434.5	2.2	91.2	5.5	51.6	7.82	2.186	2	0.0938655
777	26	RBC	B	434.5	2.2	91.2	5.5	51.6	7.82	2.186	2	0.190213
778	26	RBC	B	434.5	2.2	91.2	5.5	51.6	7.82	2.186	3	0.137921
779	26	RBC	B	434.5	2.2	91.2	5.5	51.6	7.82	2.186	3	0.188007
780	26	RBC	B	434.5	2.2	91.2	5.5	51.6	7.82	2.186	3	0.149983
781	26	RBC	B	434.5	2.2	91.2	5.5	51.6	7.82	2.186	3	0.591717
782	26	RBC	B	434.5	2.2	91.2	5.5	51.6	7.82	2.186	3	0.657718
783	26	RBC	B	434.5	2.2	91.2	5.5	51.6	7.82	2.186	3	0.780797
784	26	RBC	B	434.5	2.2	91.2	5.5	51.6	7.82	2.186	4	0.296784
785	26	RBC	B	434.5	2.2	91.2	5.5	51.6	7.82	2.186	4	0.788084
786	26	RBC	B	434.5	2.2	91.2	5.5	51.6	7.82	2.186	4	0.587666
787	26	RBC	B	434.5	2.2	91.2	5.5	51.6	7.82	2.186	5	0.797261
788	26	RBC	B	434.5	2.2	91.2	5.5	51.6	7.82	2.186	5	0.74156
789	26	RBC	B	434.5	2.2	91.2	5.5	51.6	7.82	2.186	5	0.52064
790	26	RBC	B	434.5	2.2	91.2	5.5	51.6	7.82	2.186	6	0.836552
791	26	RBC	B	434.5	2.2	91.2	5.5	51.6	7.82	2.186	6	0.60164
792	26	RBC	B	434.5	2.2	91.2	5.5	51.6	7.82	2.186	7	0.882408
793	26	RBC	B	434.5	2.2	91.2	5.5	51.6	7.82	2.186	7	0.823371
794	26	RBC	B	434.5	2.2	91.2	5.5	51.6	7.82	2.186	7	0.749828
795	26	RBC	B	434.5	2.2	91.2	5.5	51.6	7.82	2.186	8	0.924515
796	26	RBC	B	434.5	2.2	91.2	5.5	51.6	7.82	2.186	8	0.67357
797	26	RBC	B	434.5	2.2	91.2	5.5	51.6	7.82	2.186	8	0.949963
798	26	RBC	B	434.5	2.2	91.2	5.5	51.6	7.82	2.186	10	0.905472
799	26	RBC	B	434.5	2.2	91.2	5.5	51.6	7.82	2.186	10	0.874503
800	26	RBC	B	434.5	2.2	91.2	5.5	51.6	7.82	2.186	10	0.83998
801	26	RBC	B	434.5	2.2	91.2	5.5	51.6	7.82	2.186	14	0.953341
802	26	RBC	B	434.5	2.2	91.2	5.5	51.6	7.82	2.186	14	0.90627
803	26	RBC	B	434.5	2.2	91.2	5.5	51.6	7.82	2.186	14	0.913885
804	26	RBC	B	434.5	2.2	91.2	5.5	51.6	7.82	2.186	21	0.910839
805	26	RBC	B	434.5	2.2	91.2	5.5	51.6	7.82	2.186	21	0.895971
806	26	RBC	B	434.5	2.2	91.2	5.5	51.6	7.82	2.186	21	0.962624
807	26	RBC	B	434.5	2.2	91.2	5.5	51.6	7.82	2.186	28	0.927738
808	26	RBC	B	434.5	2.2	91.2	5.5	51.6	7.82	2.186	28	0.917222
809	26	RBC	B	434.5	2.2	91.2	5.5	51.6	7.82	2.186	28	0.980393
810	27	RBC	B	434.5	2.2	91.2	5.5	66.3	7.79	5.463	0	-0.0298324
811	27	RBC	B	434.5	2.2	91.2	5.5	66.3	7.79	5.463	0	0.0201962
812	27	RBC	B	434.5	2.2	91.2	5.5	66.3	7.79	5.463	0	0.00532095
813	27	RBC	B	434.5	2.2	91.2	5.5	66.3	7.79	5.463	0	-0.0390242
814	27	RBC	B	434.5	2.2	91.2	5.5	66.3	7.79	5.463	0	0.00609278
815	27	RBC	B	434.5	2.2	91.2	5.5	66.3	7.79	5.463	0	0.0372467
816	27	RBC	B	434.5	2.2	91.2	5.5	66.3	7.79	5.463	1	0.0270725
817	27	RBC	B	434.5	2.2	91.2	5.5	66.3	7.79	5.463	1	-0.00450234
818	27	RBC	B	434.5	2.2	91.2	5.5	66.3	7.79	5.463	1	0.129936
819	27	RBC	B	434.5	2.2	91.2	5.5	66.3	7.79	5.463	7	0.0156354
820	27	RBC	B	434.5	2.2	91.2	5.5	66.3	7.79	5.463	7	0.00665411
821	27	RBC	B	434.5	2.2	91.2	5.5	66.3	7.79	5.463	7	0.0667867
822	27	RBC	B	434.5	2.2	91.2	5.5	66.3	7.79	5.463	14	0.0548584
823	27	RBC	B	434.5	2.2	91.2	5.5	66.3	7.79	5.463	14	0.0704354
824	27	RBC	B	434.5	2.2	91.2	5.5	66.3	7.79	5.463	14	0.104677
825	27	RBC	B	434.5	2.2	91.2	5.5	66.3	7.79	5.463	21	0.0672077
826	27	RBC	B	434.5	2.2	91.2	5.5	66.3	7.79	5.463	21	0.0818023
827	27	RBC	B	434.5	2.2	91.2	5.5	66.3	7.79	5.463	21	0.153302
828	27	RBC	B	434.5	2.2	91.2	5.5	66.3	7.79	5.463	28	0.166984
829	27	RBC	B	434.5	2.2	91.2	5.5	66.3	7.79	5.463	28	0.121306
830	27	RBC	B	434.5	2.2	91.2	5.5	66.3	7.79	5.463	28	0.104256
831	27	RBC	B	434.5	2.2	91.2	5.5	66.3	7.79	5.463	35	0.24957
832	27	RBC	B	434.5	2.2	91.2	5.5	66.3	7.79	5.463	35	0.286057
833	27	RBC	B	434.5	2.2	91.2	5.5	66.3	7.79	5.463	35	0.213996
834	27	RBC	B	434.5	2.2	91.2	5.5	66.3	7.79	5.463	42	0.792939
835	27	RBC	B	434.5	2.2	91.2	5.5	66.3	7.79	5.463	42	0.43088
836	27	RBC	B	434.5	2.2	91.2	5.5	66.3	7.79	5.463	42	0.446948
837	27	RBC	B	434.5	2.2	91.2	5.5	66.3	7.79	5.463	49	0.760031
838	27	RBC	B	434.5	2.2	91.2	5.5	66.3	7.79	5.463	49	0.854826
839	27	RBC	B	434.5	2.2	91.2	5.5	66.3	7.79	5.463	49	0.921554
840	27	RBC	B	434.5	2.2	91.2	5.5	66.3	7.79	5.463	56	0.875946
841	27	RBC	B	434.5	2.2	91.2	5.5	66.3	7.79	5.463	56	0.808516
842	27	RBC	B	434.5	2.2	91.2	5.5	66.3	7.79	5.463	56	0.941692
843	27	RBC	B	434.5	2.2	91.2	5.5	66.3	7.79	5.463	63	0.911169
844	27	RBC	B	434.5	2.2	91.2	5.5	66.3	7.79	5.463	63	0.841073
845	27	RBC	B	434.5	2.2	91.2	5.5	66.3	7.79	5.463	63	0.937131
846	28	RBC	B	434.5	2.2	91.2	5.5	51.6	19.5	2.099	0	-0.044
847	28	RBC	B	434.5	2.2	91.2	5.5	51.6	19.5	2.099	0	0.088
848	28	RBC	B	434.5	2.2	91.2	5.5	51.6	19.5	2.099	0	0.007
849	28	RBC	B	434.5	2.2	91.2	5.5	51.6	19.5	2.099	0	-0.02
850	28	RBC	B	434.5	2.2	91.2	5.5	51.6	19.5	2.099	0	-0.03
851	28	RBC	B	434.5	2.2	91.2	5.5	51.6	19.5	2.099	1	0.061
852	28	RBC	B	434.5	2.2	91.2	5.5	51.6	19.5	2.099	1	0.043
853	28	RBC	B	434.5	2.2	91.2	5.5	51.6	19.5	2.099	1	0.209
854	28	RBC	B	434.5	2.2	91.2	5.5	51.6	19.5	2.099	3	0.043
855	28	RBC	B	434.5	2.2	91.2	5.5	51.6	19.5	2.099	3	0.209
856	28	RBC	B	434.5	2.2	91.2	5.5	51.6	19.5	2.099	3	0.099
857	28	RBC	B	434.5	2.2	91.2	5.5	51.6	19.5	2.099	3	0.133
858	28	RBC	B	434.5	2.2	91.2	5.5	51.6	19.5	2.099	3	0.195
859	28	RBC	B	434.5	2.2	91.2	5.5	51.6	19.5	2.099	5	0.208508
860	28	RBC	B	434.5	2.2	91.2	5.5	51.6	19.5	2.099	5	0.334655
861	28	RBC	B	434.5	2.2	91.2	5.5	51.6	19.5	2.099	5	0.205959
862	28	RBC	B	434.5	2.2	91.2	5.5	51.6	19.5	2.099	7	0.397053
863	28	RBC	B	434.5	2.2	91.2	5.5	51.6	19.5	2.099	7	0.532698
864	28	RBC	B	434.5	2.2	91.2	5.5	51.6	19.5	2.099	7	0.435858
865	28	RBC	B	434.5	2.2	91.2	5.5	51.6	19.5	2.099	11	0.492804
866	28	RBC	B	434.5	2.2	91.2	5.5	51.6	19.5	2.099	11	0.429223
867	28	RBC	B	434.5	2.2	91.2	5.5	51.6	19.5	2.099	11	0.709246
868	28	RBC	B	434.5	2.2	91.2	5.5	51.6	19.5	2.099	14	0.594267
869	28	RBC	B	434.5	2.2	91.2	5.5	51.6	19.5	2.099	14	0.705279
870	28	RBC	B	434.5	2.2	91.2	5.5	51.6	19.5	2.099	14	0.576678
871	28	RBC	B	434.5	2.2	91.2	5.5	51.6	19.5	2.099	14	0.907747
872	28	RBC	B	434.5	2.2	91.2	5.5	51.6	19.5	2.099	14	0.855015
873	28	RBC	B	434.5	2.2	91.2	5.5	51.6	19.5	2.099	18	0.94708
874	28	RBC	B	434.5	2.2	91.2	5.5	51.6	19.5	2.099	18	0.858713
875	28	RBC	B	434.5	2.2	91.2	5.5	51.6	19.5	2.099	18	0.908567
876	28	RBC	B	434.5	2.2	91.2	5.5	51.6	19.5	2.099	21	0.94529
877	28	RBC	B	434.5	2.2	91.2	5.5	51.6	19.5	2.099	21	0.934757
878	28	RBC	B	434.5	2.2	91.2	5.5	51.6	19.5	2.099	21	0.812054
879	29	SFN	A	464.8	4.1	92.4	7.2	45.5	5.2	1.87062	0	-0.0300735
880	29	SFN	A	464.8	4.1	92.4	7.2	45.5	5.2	1.87062	0	-0.0171849
881	29	SFN	A	464.8	4.1	92.4	7.2	45.5	5.2	1.87062	0	0.054381
882	29	SFN	A	464.8	4.1	92.4	7.2	45.5	5.2	1.87062	0	0.00689655
883	29	SFN	A	464.8	4.1	92.4	7.2	45.5	5.2	1.87062	0	0.0526851
884	29	SFN	A	464.8	4.1	92.4	7.2	45.5	5.2	1.87062	0	-0.0667044
885	29	SFN	A	464.8	4.1	92.4	7.2	45.5	5.2	1.87062	0.25	0.0204635
886	29	SFN	A	464.8	4.1	92.4	7.2	45.5	5.2	1.87062	0.25	-0.0758621
887	29	SFN	A	464.8	4.1	92.4	7.2	45.5	5.2	1.87062	0.25	0.0591295
888	29	SFN	A	464.8	4.1	92.4	7.2	45.5	5.2	1.87062	1	0.0123233
889	29	SFN	A	464.8	4.1	92.4	7.2	45.5	5.2	1.87062	1	-0.154551
890	29	SFN	A	464.8	4.1	92.4	7.2	45.5	5.2	1.87062	1	-0.0361786
891	29	SFN	A	464.8	4.1	92.4	7.2	45.5	5.2	1.87062	2	0.193103
892	29	SFN	A	464.8	4.1	92.4	7.2	45.5	5.2	1.87062	2	0.0302996
893	29	SFN	A	464.8	4.1	92.4	7.2	45.5	5.2	1.87062	2	-0.0202374
894	29	SFN	A	464.8	4.1	92.4	7.2	45.5	5.2	1.87062	2.2	0.0882985
895	29	SFN	A	464.8	4.1	92.4	7.2	45.5	5.2	1.87062	2.2	0.091351
896	29	SFN	A	464.8	4.1	92.4	7.2	45.5	5.2	1.87062	2.2	0.0248728
897	29	SFN	A	464.8	4.1	92.4	7.2	45.5	5.2	1.87062	3	0.438327
898	29	SFN	A	464.8	4.1	92.4	7.2	45.5	5.2	1.87062	3	0.519729
899	29	SFN	A	464.8	4.1	92.4	7.2	45.5	5.2	1.87062	3	0.49056
900	29	SFN	A	464.8	4.1	92.4	7.2	45.5	5.2	1.87062	4	0.16156
901	29	SFN	A	464.8	4.1	92.4	7.2	45.5	5.2	1.87062	4	0.680497
902	29	SFN	A	464.8	4.1	92.4	7.2	45.5	5.2	1.87062	4	0.384398
903	29	SFN	A	464.8	4.1	92.4	7.2	45.5	5.2	1.87062	5	0.77004
904	29	SFN	A	464.8	4.1	92.4	7.2	45.5	5.2	1.87062	5	0.817524
905	29	SFN	A	464.8	4.1	92.4	7.2	45.5	5.2	1.87062	5	0.385076
906	30	TRM	A	615.4	3.4	102	12.6	45.5	4.5	0.917	0	0.0491928
907	30	TRM	A	615.4	3.4	102	12.6	45.5	4.5	0.917	0	-0.0163976
908	30	TRM	A	615.4	3.4	102	12.6	45.5	4.5	0.917	0	0.0446168
909	30	TRM	A	615.4	3.4	102	12.6	45.5	4.5	0.917	0	0.0122029
910	30	TRM	A	615.4	3.4	102	12.6	45.5	4.5	0.917	0	-0.00533876
911	30	TRM	A	615.4	3.4	102	12.6	45.5	4.5	0.917	0	-0.0842761
912	30	TRM	A	615.4	3.4	102	12.6	45.5	4.5	0.917	0.0416667	-0.0122029
913	30	TRM	A	615.4	3.4	102	12.6	45.5	4.5	0.917	0.0416667	0.0244057
914	30	TRM	A	615.4	3.4	102	12.6	45.5	4.5	0.917	0.0416667	0.0255498
915	30	TRM	A	615.4	3.4	102	12.6	45.5	4.5	0.917	0.125	0.0137282
916	30	TRM	A	615.4	3.4	102	12.6	45.5	4.5	0.917	0.125	0.0434727
917	30	TRM	A	615.4	3.4	102	12.6	45.5	4.5	0.917	0.125	0.0160163
918	30	TRM	A	615.4	3.4	102	12.6	45.5	4.5	0.917	0.25	0.211262
919	30	TRM	A	615.4	3.4	102	12.6	45.5	4.5	0.917	0.25	0.207067
920	30	TRM	A	615.4	3.4	102	12.6	45.5	4.5	0.917	0.25	0
921	30	TRM	A	615.4	3.4	102	12.6	45.5	4.5	0.917	1	0.208212
922	30	TRM	A	615.4	3.4	102	12.6	45.5	4.5	0.917	1	0.23338
923	30	TRM	A	615.4	3.4	102	12.6	45.5	4.5	0.917	1	0.100292
924	30	TRM	A	615.4	3.4	102	12.6	45.5	4.5	0.917	3	0.751621
925	30	TRM	A	615.4	3.4	102	12.6	45.5	4.5	0.917	3	0.781747
926	30	TRM	A	615.4	3.4	102	12.6	45.5	4.5	0.917	3	0.329478
927	30	TRM	A	615.4	3.4	102	12.6	45.5	4.5	0.917	7	0.438159
928	30	TRM	A	615.4	3.4	102	12.6	45.5	4.5	0.917	7	0.463328
929	30	TRM	A	615.4	3.4	102	12.6	45.5	4.5	0.917	7	0.808059

## Sheet: File S2 (Training)
ID			Drug-Specific Parameters				Scaffold Specific Parameters				In Vitro
Scaffold #	Drug	Solvent	MW (g/mol)	LogP	PSA (Å)	pKa	%CAC	%Load (wt.)	Fd (µm)	Time (Days)	Observed F(t)	Predicted F(t)	AE	SE
1	DXR	A	579.15	1.27	206	8.2	47	3.81	0.63	0	-0.035196	0.0846546	0.119851	0.0143641
1	DXR	A	579.15	1.27	206	8.2	47	3.81	0.63	0	-0.00392502	0.0846546	0.0885796	0.00784634
1	DXR	A	579.15	1.27	206	8.2	47	3.81	0.63	0	-0.0942124	0.0846546	0.178867	0.0319934
1	DXR	A	579.15	1.27	206	8.2	47	3.81	0.63	0	0.0303778	0.0846546	0.0542768	0.00294597
1	DXR	A	579.15	1.27	206	8.2	47	3.81	0.63	1	0.567589	0.38142	0.186169	0.034659
1	DXR	A	579.15	1.27	206	8.2	47	3.81	0.63	1	0.658476	0.38142	0.277056	0.0767599
1	DXR	A	579.15	1.27	206	8.2	47	3.81	0.63	2	0.660662	0.629452	0.0312099	0.000974056
1	DXR	A	579.15	1.27	206	8.2	47	3.81	0.63	2	0.84871	0.629452	0.219259	0.0480743
1	DXR	A	579.15	1.27	206	8.2	47	3.81	0.63	2	0.702579	0.629452	0.0731277	0.00534766
1	DXR	A	579.15	1.27	206	8.2	47	3.81	0.63	3	0.763676	0.798717	0.0350413	0.00122789
1	DXR	A	579.15	1.27	206	8.2	47	3.81	0.63	3	0.830025	0.798717	0.0313081	0.000980198
1	DXR	A	579.15	1.27	206	8.2	47	3.81	0.63	3	0.740514	0.798717	0.0582036	0.00338766
1	DXR	A	579.15	1.27	206	8.2	47	3.81	0.63	5	0.854527	0.904673	0.0501456	0.00251458
1	DXR	A	579.15	1.27	206	8.2	47	3.81	0.63	5	0.922675	0.904673	0.0180018	0.000324064
1	DXR	A	579.15	1.27	206	8.2	47	3.81	0.63	5	0.862706	0.904673	0.0419665	0.00176119
2	DXR	A	579.15	1.27	206	8.2	50	4.32	0.548	0	-0.116866	0.0262532	0.14312	0.0204832
2	DXR	A	579.15	1.27	206	8.2	50	4.32	0.548	0	-0.0283306	0.0262532	0.0545839	0.0029794
2	DXR	A	579.15	1.27	206	8.2	50	4.32	0.548	0	0.0016496	0.0262532	0.0246036	0.000605339
2	DXR	A	579.15	1.27	206	8.2	50	4.32	0.548	0	-0.00709861	0.0262532	0.0333519	0.00111235
2	DXR	A	579.15	1.27	206	8.2	50	4.32	0.548	0	0.00937613	0.0262532	0.0168771	0.000284837
2	DXR	A	579.15	1.27	206	8.2	50	4.32	0.548	0	0.14127	0.0262532	0.115017	0.0132288
2	DXR	A	579.15	1.27	206	8.2	50	4.32	0.548	1	0.350269	0.192151	0.158118	0.0250015
2	DXR	A	579.15	1.27	206	8.2	50	4.32	0.548	1	0.30391	0.192151	0.111759	0.0124901
2	DXR	A	579.15	1.27	206	8.2	50	4.32	0.548	3	0.437209	0.418769	0.0184399	0.000340028
2	DXR	A	579.15	1.27	206	8.2	50	4.32	0.548	3	0.426992	0.418769	0.00822297	6.76172e-05
2	DXR	A	579.15	1.27	206	8.2	50	4.32	0.548	3	0.459207	0.418769	0.0404381	0.00163524
2	DXR	A	579.15	1.27	206	8.2	50	4.32	0.548	7	0.404994	0.584751	0.179757	0.0323127
2	DXR	A	579.15	1.27	206	8.2	50	4.32	0.548	7	0.619037	0.584751	0.0342866	0.00117557
2	DXR	A	579.15	1.27	206	8.2	50	4.32	0.548	14	0.957344	0.801336	0.156008	0.0243386
2	DXR	A	579.15	1.27	206	8.2	50	4.32	0.548	14	0.643718	0.801336	0.157618	0.0248436
2	DXR	A	579.15	1.27	206	8.2	50	4.32	0.548	21	0.91852	0.880373	0.0381472	0.00145521
2	DXR	A	579.15	1.27	206	8.2	50	4.32	0.548	21	0.86833	0.880373	0.0120433	0.000145042
3	DXR	A	579.15	1.27	206	8.2	59	3.93	0.428	0	-0.139252	0.066175	0.205427	0.0422003
3	DXR	A	579.15	1.27	206	8.2	59	3.93	0.428	0	-0.0379375	0.066175	0.104112	0.0108394
3	DXR	A	579.15	1.27	206	8.2	59	3.93	0.428	0	-0.114599	0.066175	0.180774	0.0326792
3	DXR	A	579.15	1.27	206	8.2	59	3.93	0.428	0	0.130772	0.066175	0.0645972	0.0041728
3	DXR	A	579.15	1.27	206	8.2	59	3.93	0.428	0	0.0637534	0.066175	0.00242162	5.86426e-06
3	DXR	A	579.15	1.27	206	8.2	59	3.93	0.428	1	0.301397	0.195462	0.105935	0.0112222
3	DXR	A	579.15	1.27	206	8.2	59	3.93	0.428	1	0.391052	0.195462	0.19559	0.0382553
3	DXR	A	579.15	1.27	206	8.2	59	3.93	0.428	1	0.411328	0.195462	0.215866	0.0465982
3	DXR	A	579.15	1.27	206	8.2	59	3.93	0.428	3	0.48057	0.360019	0.120551	0.0145325
3	DXR	A	579.15	1.27	206	8.2	59	3.93	0.428	7	0.381272	0.387269	0.00599676	3.59611e-05
3	DXR	A	579.15	1.27	206	8.2	59	3.93	0.428	7	0.413448	0.387269	0.0261791	0.000685347
3	DXR	A	579.15	1.27	206	8.2	59	3.93	0.428	7	0.429109	0.387269	0.0418397	0.00175056
3	DXR	A	579.15	1.27	206	8.2	59	3.93	0.428	14	0.576653	0.536767	0.0398856	0.00159086
3	DXR	A	579.15	1.27	206	8.2	59	3.93	0.428	14	0.537638	0.536767	0.000871099	7.58813e-07
3	DXR	A	579.15	1.27	206	8.2	59	3.93	0.428	21	0.505155	0.53144	0.0262851	0.000690907
3	DXR	A	579.15	1.27	206	8.2	59	3.93	0.428	21	0.453728	0.53144	0.0777118	0.00603913
3	DXR	A	579.15	1.27	206	8.2	59	3.93	0.428	28	0.681934	0.70212	0.0201861	0.000407478
3	DXR	A	579.15	1.27	206	8.2	59	3.93	0.428	35	0.348755	0.700792	0.352037	0.12393
3	DXR	A	579.15	1.27	206	8.2	59	3.93	0.428	35	0.623703	0.700792	0.0770888	0.00594268
3	DXR	A	579.15	1.27	206	8.2	59	3.93	0.428	35	0.764613	0.700792	0.0638218	0.00407322
4	ERL	A	393.4	3.3	74.7	5.42	47	9.52	1.042	0	-0.0549653	-0.00298066	0.0519846	0.0027024
4	ERL	A	393.4	3.3	74.7	5.42	47	9.52	1.042	0	0.0106254	-0.00298066	0.013606	0.000185124
4	ERL	A	393.4	3.3	74.7	5.42	47	9.52	1.042	0	-0.0107129	-0.00298066	0.00773225	5.97878e-05
4	ERL	A	393.4	3.3	74.7	5.42	47	9.52	1.042	0	0.0265142	-0.00298066	0.0294949	0.000869947
4	ERL	A	393.4	3.3	74.7	5.42	47	9.52	1.042	1	0.146534	0.0802813	0.0662526	0.0043894
4	ERL	A	393.4	3.3	74.7	5.42	47	9.52	1.042	2	0.204114	0.164067	0.0400472	0.00160378
4	ERL	A	393.4	3.3	74.7	5.42	47	9.52	1.042	2	0.192625	0.164067	0.0285574	0.000815525
4	ERL	A	393.4	3.3	74.7	5.42	47	9.52	1.042	3	0.161438	0.255246	0.0938084	0.00880002
4	ERL	A	393.4	3.3	74.7	5.42	47	9.52	1.042	5	0.535876	0.48969	0.0461859	0.00213313
4	ERL	A	393.4	3.3	74.7	5.42	47	9.52	1.042	5	0.56529	0.48969	0.0755999	0.00571534
4	ERL	A	393.4	3.3	74.7	5.42	47	9.52	1.042	5	0.16111	0.48969	0.32858	0.107965
4	ERL	A	393.4	3.3	74.7	5.42	47	9.52	1.042	7	0.942419	0.755535	0.186884	0.0349258
4	ERL	A	393.4	3.3	74.7	5.42	47	9.52	1.042	7	0.800077	0.755535	0.0445416	0.00198395
5	ERL	A	393.4	3.3	74.7	5.42	50	10.51	0.664	0	0.0482122	0.0142228	0.0339894	0.00115528
5	ERL	A	393.4	3.3	74.7	5.42	50	10.51	0.664	0	0.00220088	0.0142228	0.0120219	0.000144526
5	ERL	A	393.4	3.3	74.7	5.42	50	10.51	0.664	0	-0.0252164	0.0142228	0.0394392	0.00155545
5	ERL	A	393.4	3.3	74.7	5.42	50	10.51	0.664	1	0.0161381	0.0338658	0.0177277	0.000314272
5	ERL	A	393.4	3.3	74.7	5.42	50	10.51	0.664	1	0.0718778	0.0338658	0.038012	0.00144491
5	ERL	A	393.4	3.3	74.7	5.42	50	10.51	0.664	3	0.109652	0.0629572	0.046695	0.00218042
5	ERL	A	393.4	3.3	74.7	5.42	50	10.51	0.664	3	0.0386838	0.0629572	0.0242734	0.0005892
5	ERL	A	393.4	3.3	74.7	5.42	50	10.51	0.664	3	0.0437997	0.0629572	0.0191575	0.000367011
5	ERL	A	393.4	3.3	74.7	5.42	50	10.51	0.664	7	0.161228	0.127082	0.034146	0.00116595
5	ERL	A	393.4	3.3	74.7	5.42	50	10.51	0.664	7	0.0725916	0.127082	0.0544902	0.00296918
5	ERL	A	393.4	3.3	74.7	5.42	50	10.51	0.664	14	0.147427	0.166198	0.018771	0.00035235
5	ERL	A	393.4	3.3	74.7	5.42	50	10.51	0.664	21	0.354502	0.344517	0.00998544	9.9709e-05
5	ERL	A	393.4	3.3	74.7	5.42	50	10.51	0.664	21	0.357358	0.344517	0.0128408	0.000164887
5	ERL	A	393.4	3.3	74.7	5.42	50	10.51	0.664	38	0.648251	0.65901	0.0107594	0.000115764
5	ERL	A	393.4	3.3	74.7	5.42	50	10.51	0.664	38	0.673355	0.65901	0.0143443	0.00020576
5	ERL	A	393.4	3.3	74.7	5.42	50	10.51	0.664	49	0.804703	0.792292	0.0124108	0.000154027
5	ERL	A	393.4	3.3	74.7	5.42	50	10.51	0.664	49	0.801074	0.792292	0.00878203	7.7124e-05
6	EVR	A	958.2	5.9	205	10.4	47	4.2	0.63475	0	0.0412925	0.0187907	0.0225018	0.000506331
6	EVR	A	958.2	5.9	205	10.4	47	4.2	0.63475	0	0.000164785	0.0187907	0.0186259	0.000346923
6	EVR	A	958.2	5.9	205	10.4	47	4.2	0.63475	0	9.61248e-05	0.0187907	0.0186945	0.000349486
6	EVR	A	958.2	5.9	205	10.4	47	4.2	0.63475	0	-0.0319684	0.0187907	0.050759	0.00257648
6	EVR	A	958.2	5.9	205	10.4	47	4.2	0.63475	0	-0.00958502	0.0187907	0.0283757	0.000805179
6	EVR	A	958.2	5.9	205	10.4	47	4.2	0.63475	1	0.313875	0.309225	0.00465021	2.16245e-05
6	EVR	A	958.2	5.9	205	10.4	47	4.2	0.63475	1	0.25057	0.309225	0.0586548	0.00344039
6	EVR	A	958.2	5.9	205	10.4	47	4.2	0.63475	2	0.465477	0.555215	0.0897373	0.00805279
6	EVR	A	958.2	5.9	205	10.4	47	4.2	0.63475	3	0.815784	0.727035	0.088749	0.00787639
6	EVR	A	958.2	5.9	205	10.4	47	4.2	0.63475	3	0.604652	0.727035	0.122382	0.0149774
6	EVR	A	958.2	5.9	205	10.4	47	4.2	0.63475	5	0.908063	0.844151	0.0639127	0.00408484
7	EVR	A	958.2	5.9	205	10.4	50	4.46	0.59495	0	-0.0530216	-0.00447436	0.0485473	0.00235684
7	EVR	A	958.2	5.9	205	10.4	50	4.46	0.59495	0	-0.0202512	-0.00447436	0.0157769	0.00024891
7	EVR	A	958.2	5.9	205	10.4	50	4.46	0.59495	0	0.0379001	-0.00447436	0.0423745	0.0017956
7	EVR	A	958.2	5.9	205	10.4	50	4.46	0.59495	0	-0.0593187	-0.00447436	0.0548443	0.0030079
7	EVR	A	958.2	5.9	205	10.4	50	4.46	0.59495	0	0.0287758	-0.00447436	0.0332502	0.00110557
7	EVR	A	958.2	5.9	205	10.4	50	4.46	0.59495	1	0.255722	0.159282	0.0964401	0.0093007
7	EVR	A	958.2	5.9	205	10.4	50	4.46	0.59495	1	0.155735	0.159282	0.00354621	1.25756e-05
7	EVR	A	958.2	5.9	205	10.4	50	4.46	0.59495	1	0.115947	0.159282	0.0433341	0.00187784
7	EVR	A	958.2	5.9	205	10.4	50	4.46	0.59495	3	0.294347	0.386089	0.0917421	0.00841661
7	EVR	A	958.2	5.9	205	10.4	50	4.46	0.59495	3	0.279943	0.386089	0.106146	0.0112669
7	EVR	A	958.2	5.9	205	10.4	50	4.46	0.59495	5	0.495611	0.496489	0.000877408	7.69844e-07
7	EVR	A	958.2	5.9	205	10.4	50	4.46	0.59495	5	0.509821	0.496489	0.0133325	0.000177757
7	EVR	A	958.2	5.9	205	10.4	50	4.46	0.59495	5	0.498001	0.496489	0.00151245	2.2875e-06
7	EVR	A	958.2	5.9	205	10.4	50	4.46	0.59495	7	0.524548	0.565501	0.0409525	0.0016771
7	EVR	A	958.2	5.9	205	10.4	50	4.46	0.59495	7	0.61885	0.565501	0.0533499	0.00284621
7	EVR	A	958.2	5.9	205	10.4	50	4.46	0.59495	7	0.621434	0.565501	0.0559335	0.00312856
7	EVR	A	958.2	5.9	205	10.4	50	4.46	0.59495	10	0.73957	0.686737	0.0528333	0.00279136
7	EVR	A	958.2	5.9	205	10.4	50	4.46	0.59495	10	0.711151	0.686737	0.0244134	0.000596015
8	EVR	A	958.2	5.9	205	10.4	59	4.42	0.44935	0	-0.0257763	-0.0121272	0.0136491	0.000186298
8	EVR	A	958.2	5.9	205	10.4	59	4.42	0.44935	0	0.0285011	-0.0121272	0.0406282	0.00165065
8	EVR	A	958.2	5.9	205	10.4	59	4.42	0.44935	0	0.0303975	-0.0121272	0.0425247	0.00180835
8	EVR	A	958.2	5.9	205	10.4	59	4.42	0.44935	0	-0.0261687	-0.0121272	0.0140415	0.000197163
8	EVR	A	958.2	5.9	205	10.4	59	4.42	0.44935	0	-0.0161633	-0.0121272	0.00403614	1.62904e-05
8	EVR	A	958.2	5.9	205	10.4	59	4.42	0.44935	1	0.0156184	0.102116	0.0864974	0.00748181
8	EVR	A	958.2	5.9	205	10.4	59	4.42	0.44935	1	0.106778	0.102116	0.00466233	2.17373e-05
8	EVR	A	958.2	5.9	205	10.4	59	4.42	0.44935	3	0.226515	0.248797	0.0222814	0.000496462
8	EVR	A	958.2	5.9	205	10.4	59	4.42	0.44935	3	0.103508	0.248797	0.145288	0.0211087
8	EVR	A	958.2	5.9	205	10.4	59	4.42	0.44935	7	0.23057	0.287929	0.0573593	0.00329009
8	EVR	A	958.2	5.9	205	10.4	59	4.42	0.44935	7	0.242079	0.287929	0.0458499	0.00210221
8	EVR	A	958.2	5.9	205	10.4	59	4.42	0.44935	7	0.268498	0.287929	0.0194306	0.000377548
8	EVR	A	958.2	5.9	205	10.4	59	4.42	0.44935	14	0.503264	0.499572	0.0036924	1.36338e-05
8	EVR	A	958.2	5.9	205	10.4	59	4.42	0.44935	14	0.480965	0.499572	0.0186071	0.000346224
8	EVR	A	958.2	5.9	205	10.4	59	4.42	0.44935	21	0.589192	0.552643	0.0365499	0.0013359
8	EVR	A	958.2	5.9	205	10.4	59	4.42	0.44935	21	0.612473	0.552643	0.0598303	0.00357967
8	EVR	A	958.2	5.9	205	10.4	59	4.42	0.44935	28	0.76458	0.747976	0.0166038	0.000275687
8	EVR	A	958.2	5.9	205	10.4	59	4.42	0.44935	28	0.735087	0.747976	0.012889	0.000166127
8	EVR	A	958.2	5.9	205	10.4	59	4.42	0.44935	28	0.793615	0.747976	0.0456389	0.00208291
8	EVR	A	958.2	5.9	205	10.4	59	4.42	0.44935	35	0.967237	0.823467	0.143771	0.02067
8	EVR	A	958.2	5.9	205	10.4	59	4.42	0.44935	35	1	0.823467	0.176533	0.031164
8	EVR	A	958.2	5.9	205	10.4	59	4.42	0.44935	35	0.920546	0.823467	0.097079	0.00942434
9	PTX	A	853.9	2.5	221	10.4	64.5	5.2	0.341	0	0.0144081	0.00201093	0.0123971	0.000153689
9	PTX	A	853.9	2.5	221	10.4	64.5	5.2	0.341	0	-0.00612586	0.00201093	0.00813679	6.62074e-05
9	PTX	A	853.9	2.5	221	10.4	64.5	5.2	0.341	0	-0.000545404	0.00201093	0.00255633	6.53484e-06
9	PTX	A	853.9	2.5	221	10.4	64.5	5.2	0.341	0	-0.00583691	0.00201093	0.00784784	6.15885e-05
9	PTX	A	853.9	2.5	221	10.4	64.5	5.2	0.341	0	-0.00189988	0.00201093	0.00391081	1.52945e-05
9	PTX	A	853.9	2.5	221	10.4	64.5	5.2	0.341	0.0833333	-0.0238425	0.00348095	0.0273234	0.000746569
9	PTX	A	853.9	2.5	221	10.4	64.5	5.2	0.341	0.0833333	0.0327567	0.00348095	0.0292758	0.000857072
9	PTX	A	853.9	2.5	221	10.4	64.5	5.2	0.341	0.0833333	0.0200246	0.00348095	0.0165437	0.000273693
9	PTX	A	853.9	2.5	221	10.4	64.5	5.2	0.341	0.166667	0.013776	0.00491771	0.00885826	7.84687e-05
9	PTX	A	853.9	2.5	221	10.4	64.5	5.2	0.341	0.166667	0.0150763	0.00491771	0.0101586	0.000103196
9	PTX	A	853.9	2.5	221	10.4	64.5	5.2	0.341	1	0.02286	0.0175319	0.00532812	2.83889e-05
9	PTX	A	853.9	2.5	221	10.4	64.5	5.2	0.341	1	-0.000635703	0.0175319	0.0181676	0.000330061
9	PTX	A	853.9	2.5	221	10.4	64.5	5.2	0.341	3	0.0390235	0.0386964	0.000327074	1.06977e-07
9	PTX	A	853.9	2.5	221	10.4	64.5	5.2	0.341	3	0.0277	0.0386964	0.0109964	0.00012092
9	PTX	A	853.9	2.5	221	10.4	64.5	5.2	0.341	3	0.0325761	0.0386964	0.00612025	3.74575e-05
9	PTX	A	853.9	2.5	221	10.4	64.5	5.2	0.341	6	0.0505636	0.0693311	0.0187675	0.000352219
9	PTX	A	853.9	2.5	221	10.4	64.5	5.2	0.341	6	0.0785924	0.0693311	0.00926122	8.57701e-05
9	PTX	A	853.9	2.5	221	10.4	64.5	5.2	0.341	6	0.0880737	0.0693311	0.0187426	0.000351284
9	PTX	A	853.9	2.5	221	10.4	64.5	5.2	0.341	9	0.0765877	0.12664	0.0500522	0.00250523
9	PTX	A	853.9	2.5	221	10.4	64.5	5.2	0.341	9	0.151933	0.12664	0.025293	0.000639734
9	PTX	A	853.9	2.5	221	10.4	64.5	5.2	0.341	12	0.193434	0.21077	0.0173357	0.000300527
9	PTX	A	853.9	2.5	221	10.4	64.5	5.2	0.341	12	0.249961	0.21077	0.0391913	0.00153595
9	PTX	A	853.9	2.5	221	10.4	64.5	5.2	0.341	15	0.31187	0.259565	0.0523045	0.00273577
9	PTX	A	853.9	2.5	221	10.4	64.5	5.2	0.341	15	0.207575	0.259565	0.0519904	0.002703
9	PTX	A	853.9	2.5	221	10.4	64.5	5.2	0.341	15	0.257926	0.259565	0.00163988	2.6892e-06
9	PTX	A	853.9	2.5	221	10.4	64.5	5.2	0.341	18	0.314416	0.269452	0.0449648	0.00202183
9	PTX	A	853.9	2.5	221	10.4	64.5	5.2	0.341	18	0.22009	0.269452	0.0493612	0.00243653
9	PTX	A	853.9	2.5	221	10.4	64.5	5.2	0.341	21	0.292004	0.284618	0.00738613	5.45549e-05
9	PTX	A	853.9	2.5	221	10.4	64.5	5.2	0.341	21	0.272391	0.284618	0.0122267	0.000149493
9	PTX	A	853.9	2.5	221	10.4	64.5	5.2	0.341	28	0.446126	0.419472	0.0266544	0.000710458
9	PTX	A	853.9	2.5	221	10.4	64.5	5.2	0.341	28	0.389129	0.419472	0.0303421	0.000920643
9	PTX	A	853.9	2.5	221	10.4	64.5	5.2	0.341	35	0.468827	0.475201	0.00637439	4.06329e-05
10	PTX	A	853.9	2.5	221	10.4	45	10.6	0.723	0	0.000840763	0.0368188	0.0359781	0.00129442
10	PTX	A	853.9	2.5	221	10.4	45	10.6	0.723	0	-0.0379321	0.0368188	0.0747509	0.0055877
10	PTX	A	853.9	2.5	221	10.4	45	10.6	0.723	0	-0.0153293	0.0368188	0.0521481	0.00271942
10	PTX	A	853.9	2.5	221	10.4	45	10.6	0.723	0	0.00234632	0.0368188	0.0344725	0.00118835
10	PTX	A	853.9	2.5	221	10.4	45	10.6	0.723	0	0.0116729	0.0368188	0.0251459	0.000632317
10	PTX	A	853.9	2.5	221	10.4	45	10.6	0.723	1	0.29327	0.178251	0.115019	0.0132294
10	PTX	A	853.9	2.5	221	10.4	45	10.6	0.723	1	0.203484	0.178251	0.0252334	0.000636727
10	PTX	A	853.9	2.5	221	10.4	45	10.6	0.723	1	0.243587	0.178251	0.0653359	0.00426878
10	PTX	A	853.9	2.5	221	10.4	45	10.6	0.723	2	0.412756	0.317603	0.0951528	0.00905405
10	PTX	A	853.9	2.5	221	10.4	45	10.6	0.723	2	0.355799	0.317603	0.038196	0.00145893
10	PTX	A	853.9	2.5	221	10.4	45	10.6	0.723	3	0.412561	0.451257	0.0386961	0.00149739
10	PTX	A	853.9	2.5	221	10.4	45	10.6	0.723	3	0.537033	0.451257	0.085776	0.00735752
10	PTX	A	853.9	2.5	221	10.4	45	10.6	0.723	3	0.268223	0.451257	0.183034	0.0335013
10	PTX	A	853.9	2.5	221	10.4	45	10.6	0.723	4	0.692085	0.582415	0.10967	0.0120275
10	PTX	A	853.9	2.5	221	10.4	45	10.6	0.723	4	0.515212	0.582415	0.0672032	0.00451627
10	PTX	A	853.9	2.5	221	10.4	45	10.6	0.723	5	0.573577	0.712105	0.138529	0.0191902
10	PTX	A	853.9	2.5	221	10.4	45	10.6	0.723	5	0.718403	0.712105	0.00629783	3.96627e-05
10	PTX	A	853.9	2.5	221	10.4	45	10.6	0.723	6	0.981953	0.835364	0.146589	0.0214883
10	PTX	A	853.9	2.5	221	10.4	45	10.6	0.723	6	0.803281	0.835364	0.0320832	0.00102933
10	PTX	A	853.9	2.5	221	10.4	45	10.6	0.723	6	0.83259	0.835364	0.00277378	7.69388e-06
10	PTX	A	853.9	2.5	221	10.4	45	10.6	0.723	7	0.981992	0.94217	0.039822	0.00158579
10	PTX	A	853.9	2.5	221	10.4	45	10.6	0.723	7	0.940443	0.94217	0.00172739	2.98386e-06
10	PTX	A	853.9	2.5	221	10.4	45	10.6	0.723	7	0.9082	0.94217	0.0339697	0.00115394
11	PTX	A	853.9	2.5	221	10.4	50	7.68	0.5	0	-0.168011	-0.0139329	0.154078	0.0237401
11	PTX	A	853.9	2.5	221	10.4	50	7.68	0.5	0	0.0496627	-0.0139329	0.0635955	0.00404439
11	PTX	A	853.9	2.5	221	10.4	50	7.68	0.5	0	0.293185	-0.0139329	0.307118	0.0943213
11	PTX	A	853.9	2.5	221	10.4	50	7.68	0.5	0	-0.0924685	-0.0139329	0.0785356	0.00616784
11	PTX	A	853.9	2.5	221	10.4	50	7.68	0.5	0	-0.0119542	-0.0139329	0.00197869	3.9152e-06
11	PTX	A	853.9	2.5	221	10.4	50	7.68	0.5	1	-0.029657	0.0172204	0.0468774	0.0021975
11	PTX	A	853.9	2.5	221	10.4	50	7.68	0.5	1	-0.0173266	0.0172204	0.034547	0.0011935
11	PTX	A	853.9	2.5	221	10.4	50	7.68	0.5	1	-0.0136767	0.0172204	0.0308971	0.000954634
11	PTX	A	853.9	2.5	221	10.4	50	7.68	0.5	7	0.170995	0.127313	0.0436817	0.00190809
11	PTX	A	853.9	2.5	221	10.4	50	7.68	0.5	7	0.0748749	0.127313	0.0524383	0.00274977
11	PTX	A	853.9	2.5	221	10.4	50	7.68	0.5	14	0.252287	0.242299	0.00998783	9.97568e-05
11	PTX	A	853.9	2.5	221	10.4	50	7.68	0.5	14	0.222558	0.242299	0.0197414	0.000389724
11	PTX	A	853.9	2.5	221	10.4	50	7.68	0.5	14	0.238705	0.242299	0.00359381	1.29154e-05
11	PTX	A	853.9	2.5	221	10.4	50	7.68	0.5	21	0.435837	0.380862	0.0549744	0.00302218
11	PTX	A	853.9	2.5	221	10.4	50	7.68	0.5	21	0.366908	0.380862	0.013954	0.000194715
11	PTX	A	853.9	2.5	221	10.4	50	7.68	0.5	21	0.320822	0.380862	0.0600406	0.00360488
11	PTX	A	853.9	2.5	221	10.4	50	7.68	0.5	28	0.44234	0.528509	0.0861692	0.00742513
11	PTX	A	853.9	2.5	221	10.4	50	7.68	0.5	28	0.540793	0.528509	0.0122835	0.000150884
11	PTX	A	853.9	2.5	221	10.4	50	7.68	0.5	28	0.602238	0.528509	0.0737284	0.00543587
11	PTX	A	853.9	2.5	221	10.4	50	7.68	0.5	35	0.687764	0.639082	0.0486814	0.00236988
11	PTX	A	853.9	2.5	221	10.4	50	7.68	0.5	35	0.599775	0.639082	0.0393071	0.00154505
12	PTX	A	853.9	2.5	221	10.4	60	8.22	0.715	0	-0.0694966	0.0182306	0.0877273	0.00769607
12	PTX	A	853.9	2.5	221	10.4	60	8.22	0.715	0	0.0522491	0.0182306	0.0340184	0.00115725
12	PTX	A	853.9	2.5	221	10.4	60	8.22	0.715	0	0.0109118	0.0182306	0.00731881	5.3565e-05
12	PTX	A	853.9	2.5	221	10.4	60	8.22	0.715	0	-0.00308526	0.0182306	0.0213159	0.000454368
12	PTX	A	853.9	2.5	221	10.4	60	8.22	0.715	0	0.00277035	0.0182306	0.0154603	0.000239021
12	PTX	A	853.9	2.5	221	10.4	60	8.22	0.715	1	0.115326	0.0573647	0.0579617	0.00335956
12	PTX	A	853.9	2.5	221	10.4	60	8.22	0.715	1	0.111519	0.0573647	0.0541541	0.00293267
12	PTX	A	853.9	2.5	221	10.4	60	8.22	0.715	1	0.0694262	0.0573647	0.0120615	0.00014548
12	PTX	A	853.9	2.5	221	10.4	60	8.22	0.715	7	0.127883	0.163909	0.0360258	0.00129786
12	PTX	A	853.9	2.5	221	10.4	60	8.22	0.715	7	0.162418	0.163909	0.00149108	2.22333e-06
12	PTX	A	853.9	2.5	221	10.4	60	8.22	0.715	7	0.253555	0.163909	0.0896464	0.00803648
12	PTX	A	853.9	2.5	221	10.4	60	8.22	0.715	14	0.176715	0.218616	0.0419012	0.00175571
12	PTX	A	853.9	2.5	221	10.4	60	8.22	0.715	14	0.267905	0.218616	0.0492892	0.00242942
12	PTX	A	853.9	2.5	221	10.4	60	8.22	0.715	21	0.219816	0.224055	0.00423971	1.79751e-05
12	PTX	A	853.9	2.5	221	10.4	60	8.22	0.715	21	0.226579	0.224055	0.00252321	6.36657e-06
12	PTX	A	853.9	2.5	221	10.4	60	8.22	0.715	28	0.322675	0.247206	0.0754697	0.00569568
12	PTX	A	853.9	2.5	221	10.4	60	8.22	0.715	35	0.329405	0.37859	0.049185	0.00241917
12	PTX	A	853.9	2.5	221	10.4	60	8.22	0.715	35	0.348879	0.37859	0.0297111	0.000882748
12	PTX	A	853.9	2.5	221	10.4	60	8.22	0.715	42	0.337476	0.300791	0.0366851	0.0013458
12	PTX	A	853.9	2.5	221	10.4	60	8.22	0.715	49	0.345473	0.353975	0.00850225	7.22882e-05
12	PTX	A	853.9	2.5	221	10.4	60	8.22	0.715	49	0.381388	0.353975	0.0274132	0.000751485
12	PTX	A	853.9	2.5	221	10.4	60	8.22	0.715	56	0.466674	0.379383	0.0872914	0.00761979
12	PTX	A	853.9	2.5	221	10.4	60	8.22	0.715	56	0.402392	0.379383	0.0230095	0.000529439
12	PTX	A	853.9	2.5	221	10.4	60	8.22	0.715	56	0.352817	0.379383	0.0265661	0.000705758
12	PTX	A	853.9	2.5	221	10.4	60	8.22	0.715	63	0.51366	0.430082	0.0835778	0.00698526
12	PTX	A	853.9	2.5	221	10.4	60	8.22	0.715	63	0.372956	0.430082	0.0571265	0.00326344
18	PTX	A	853.9	2.5	221	10.4	61	9.4	0.533	0	-0.011606	-0.00479467	0.00681132	4.63941e-05
18	PTX	A	853.9	2.5	221	10.4	61	9.4	0.533	0	0.00512892	-0.00479467	0.00992359	9.84775e-05
18	PTX	A	853.9	2.5	221	10.4	61	9.4	0.533	0.0833333	-2.48735e-05	-0.00342074	0.00339587	1.15319e-05
18	PTX	A	853.9	2.5	221	10.4	61	9.4	0.533	0.0833333	-0.00820329	-0.00342074	0.00478254	2.28727e-05
18	PTX	A	853.9	2.5	221	10.4	61	9.4	0.533	0.0833333	0.00682032	-0.00342074	0.0102411	0.000104879
18	PTX	A	853.9	2.5	221	10.4	61	9.4	0.533	0.166667	0.000383052	-0.00208372	0.00246677	6.08496e-06
18	PTX	A	853.9	2.5	221	10.4	61	9.4	0.533	0.166667	-0.0120139	-0.00208372	0.00993019	9.86087e-05
18	PTX	A	853.9	2.5	221	10.4	61	9.4	0.533	0.166667	0.0045817	-0.00208372	0.00666542	4.44278e-05
18	PTX	A	853.9	2.5	221	10.4	61	9.4	0.533	1	0.0113075	0.00922915	0.00207835	4.31954e-06
18	PTX	A	853.9	2.5	221	10.4	61	9.4	0.533	1	0.00649199	0.00922915	0.00273716	7.49205e-06
18	PTX	A	853.9	2.5	221	10.4	61	9.4	0.533	3	0.00580548	0.0248065	0.019001	0.000361037
18	PTX	A	853.9	2.5	221	10.4	61	9.4	0.533	3	0.00752673	0.0248065	0.0172797	0.000298589
18	PTX	A	853.9	2.5	221	10.4	61	9.4	0.533	6	0.0655517	0.0485226	0.0170291	0.00028999
18	PTX	A	853.9	2.5	221	10.4	61	9.4	0.533	6	0.0229483	0.0485226	0.0255743	0.000654043
18	PTX	A	853.9	2.5	221	10.4	61	9.4	0.533	9	0.0729938	0.0837254	0.0107316	0.000115167
18	PTX	A	853.9	2.5	221	10.4	61	9.4	0.533	9	0.0714517	0.0837254	0.0122737	0.000150645
18	PTX	A	853.9	2.5	221	10.4	61	9.4	0.533	12	0.137655	0.128546	0.0091091	8.29758e-05
18	PTX	A	853.9	2.5	221	10.4	61	9.4	0.533	12	0.123169	0.128546	0.00537723	2.89146e-05
18	PTX	A	853.9	2.5	221	10.4	61	9.4	0.533	15	0.13861	0.176733	0.038123	0.00145336
18	PTX	A	853.9	2.5	221	10.4	61	9.4	0.533	15	0.207102	0.176733	0.0303687	0.000922261
18	PTX	A	853.9	2.5	221	10.4	61	9.4	0.533	15	0.171841	0.176733	0.00489195	2.39312e-05
18	PTX	A	853.9	2.5	221	10.4	61	9.4	0.533	18	0.190755	0.216003	0.025248	0.000637462
18	PTX	A	853.9	2.5	221	10.4	61	9.4	0.533	18	0.230005	0.216003	0.0140024	0.000196067
18	PTX	A	853.9	2.5	221	10.4	61	9.4	0.533	18	0.252969	0.216003	0.0369656	0.00136646
18	PTX	A	853.9	2.5	221	10.4	61	9.4	0.533	21	0.273206	0.21729	0.0559156	0.00312655
18	PTX	A	853.9	2.5	221	10.4	61	9.4	0.533	21	0.158151	0.21729	0.0591394	0.00349746
18	PTX	A	853.9	2.5	221	10.4	61	9.4	0.533	21	0.226722	0.21729	0.00943195	8.89617e-05
18	PTX	A	853.9	2.5	221	10.4	61	9.4	0.533	28	0.299741	0.298858	0.00088233	7.78506e-07
18	PTX	A	853.9	2.5	221	10.4	61	9.4	0.533	28	0.314347	0.298858	0.0154881	0.00023988
18	PTX	A	853.9	2.5	221	10.4	61	9.4	0.533	35	0.719566	0.569046	0.15052	0.0226564
18	PTX	A	853.9	2.5	221	10.4	61	9.4	0.533	35	0.558535	0.569046	0.0105108	0.000110476
17	PTX	A	853.9	2.5	221	10.4	64.5	10.46	0.526	0	0.0146451	-0.000172471	0.0148176	0.00021956
17	PTX	A	853.9	2.5	221	10.4	64.5	10.46	0.526	0	0.0137008	-0.000172471	0.0138733	0.000192468
17	PTX	A	853.9	2.5	221	10.4	64.5	10.46	0.526	0	0.00149658	-0.000172471	0.00166905	2.78573e-06
17	PTX	A	853.9	2.5	221	10.4	64.5	10.46	0.526	0	-0.030181	-0.000172471	0.0300085	0.000900513
17	PTX	A	853.9	2.5	221	10.4	64.5	10.46	0.526	0.0833333	0.0233841	0.000515345	0.0228687	0.000522978
17	PTX	A	853.9	2.5	221	10.4	64.5	10.46	0.526	0.0833333	0.016017	0.000515345	0.0155016	0.0002403
17	PTX	A	853.9	2.5	221	10.4	64.5	10.46	0.526	0.166667	0.00124715	0.00121575	3.13974e-05	9.85796e-10
17	PTX	A	853.9	2.5	221	10.4	64.5	10.46	0.526	0.166667	0.0264396	0.00121575	0.0252238	0.000636241
17	PTX	A	853.9	2.5	221	10.4	64.5	10.46	0.526	0.166667	-0.049396	0.00121575	0.0506118	0.00256155
17	PTX	A	853.9	2.5	221	10.4	64.5	10.46	0.526	1	0.0214153	0.00906522	0.0123501	0.000152525
17	PTX	A	853.9	2.5	221	10.4	64.5	10.46	0.526	1	-0.0137008	0.00906522	0.022766	0.000518293
17	PTX	A	853.9	2.5	221	10.4	64.5	10.46	0.526	1	-0.00649408	0.00906522	0.0155593	0.000242092
17	PTX	A	853.9	2.5	221	10.4	64.5	10.46	0.526	3	0.0456813	0.0358044	0.0098769	9.75532e-05
17	PTX	A	853.9	2.5	221	10.4	64.5	10.46	0.526	3	0.0420735	0.0358044	0.00626908	3.93013e-05
17	PTX	A	853.9	2.5	221	10.4	64.5	10.46	0.526	6	0.0968946	0.0964792	0.000415417	1.72571e-07
17	PTX	A	853.9	2.5	221	10.4	64.5	10.46	0.526	6	0.102427	0.0964792	0.00594742	3.53717e-05
17	PTX	A	853.9	2.5	221	10.4	64.5	10.46	0.526	9	0.22813	0.182003	0.0461273	0.00212773
17	PTX	A	853.9	2.5	221	10.4	64.5	10.46	0.526	9	0.153257	0.182003	0.0287462	0.000826343
17	PTX	A	853.9	2.5	221	10.4	64.5	10.46	0.526	9	0.143903	0.182003	0.0380998	0.00145159
17	PTX	A	853.9	2.5	221	10.4	64.5	10.46	0.526	12	0.306113	0.258133	0.0479801	0.00230209
17	PTX	A	853.9	2.5	221	10.4	64.5	10.46	0.526	12	0.275433	0.258133	0.0173003	0.000299299
17	PTX	A	853.9	2.5	221	10.4	64.5	10.46	0.526	12	0.246125	0.258133	0.0120077	0.000144186
17	PTX	A	853.9	2.5	221	10.4	64.5	10.46	0.526	15	0.246196	0.276924	0.0307274	0.000944173
17	PTX	A	853.9	2.5	221	10.4	64.5	10.46	0.526	18	0.379392	0.304397	0.0749945	0.00562418
17	PTX	A	853.9	2.5	221	10.4	64.5	10.46	0.526	18	0.227409	0.304397	0.0769884	0.00592722
17	PTX	A	853.9	2.5	221	10.4	64.5	10.46	0.526	21	0.398794	0.368221	0.0305729	0.000934702
17	PTX	A	853.9	2.5	221	10.4	64.5	10.46	0.526	21	0.340659	0.368221	0.0275621	0.000759668
17	PTX	A	853.9	2.5	221	10.4	64.5	10.46	0.526	28	0.55989	0.567075	0.00718514	5.16262e-05
17	PTX	A	853.9	2.5	221	10.4	64.5	10.46	0.526	28	0.587933	0.567075	0.0208579	0.000435052
17	PTX	A	853.9	2.5	221	10.4	64.5	10.46	0.526	35	0.569261	0.565887	0.00337446	1.1387e-05
17	PTX	A	853.9	2.5	221	10.4	64.5	10.46	0.526	35	0.536648	0.565887	0.0292385	0.00085489
13	PTX	A	853.9	2.5	221	10.4	43	19.8	1.41296	0	0.0236257	0.0187114	0.0049143	2.41503e-05
13	PTX	A	853.9	2.5	221	10.4	43	19.8	1.41296	0	-0.00284975	0.0187114	0.0215611	0.000464883
13	PTX	A	853.9	2.5	221	10.4	43	19.8	1.41296	0	-0.00996003	0.0187114	0.0286714	0.00082205
13	PTX	A	853.9	2.5	221	10.4	43	19.8	1.41296	0	-0.0236915	0.0187114	0.0424029	0.00179801
13	PTX	A	853.9	2.5	221	10.4	43	19.8	1.41296	0	0.0128756	0.0187114	0.00583576	3.40561e-05
13	PTX	A	853.9	2.5	221	10.4	43	19.8	1.41296	1	0.179506	0.115796	0.0637103	0.004059
13	PTX	A	853.9	2.5	221	10.4	43	19.8	1.41296	1	0.0750905	0.115796	0.0407054	0.00165693
13	PTX	A	853.9	2.5	221	10.4	43	19.8	1.41296	1	0.219158	0.115796	0.103362	0.0106838
13	PTX	A	853.9	2.5	221	10.4	43	19.8	1.41296	3	0.414719	0.356165	0.058554	0.00342857
13	PTX	A	853.9	2.5	221	10.4	43	19.8	1.41296	3	0.356022	0.356165	0.000143377	2.05569e-08
13	PTX	A	853.9	2.5	221	10.4	43	19.8	1.41296	4	0.596351	0.506766	0.0895851	0.00802549
13	PTX	A	853.9	2.5	221	10.4	43	19.8	1.41296	4	0.391827	0.506766	0.114939	0.0132109
13	PTX	A	853.9	2.5	221	10.4	43	19.8	1.41296	5	0.452471	0.680453	0.227982	0.0519759
13	PTX	A	853.9	2.5	221	10.4	43	19.8	1.41296	5	0.435401	0.680453	0.245052	0.0600507
13	PTX	A	853.9	2.5	221	10.4	43	19.8	1.41296	6	0.745695	0.865733	0.120038	0.0144092
13	PTX	A	853.9	2.5	221	10.4	43	19.8	1.41296	6	0.891258	0.865733	0.0255248	0.000651513
13	PTX	A	853.9	2.5	221	10.4	43	19.8	1.41296	6	0.78087	0.865733	0.0848632	0.00720176
13	PTX	A	853.9	2.5	221	10.4	43	19.8	1.41296	6	0.953962	0.865733	0.0882287	0.00778431
13	PTX	A	853.9	2.5	221	10.4	43	19.8	1.41296	6	0.927957	0.865733	0.0622236	0.00387177
13	PTX	A	853.9	2.5	221	10.4	43	19.8	1.41296	6	0.972622	0.865733	0.106888	0.0114252
13	PTX	A	853.9	2.5	221	10.4	43	19.8	1.41296	6	0.98355	0.865733	0.117817	0.0138809
13	PTX	A	853.9	2.5	221	10.4	43	19.8	1.41296	6	0.874028	0.865733	0.00829456	6.87998e-05
13	PTX	A	853.9	2.5	221	10.4	43	19.8	1.41296	6	0.850957	0.865733	0.0147762	0.000218336
13	PTX	A	853.9	2.5	221	10.4	43	19.8	1.41296	6	0.787651	0.865733	0.0780821	0.00609682
13	PTX	A	853.9	2.5	221	10.4	43	19.8	1.41296	6	0.930524	0.865733	0.0647912	0.00419789
13	PTX	A	853.9	2.5	221	10.4	43	19.8	1.41296	6	0.949485	0.865733	0.0837519	0.00701438
13	PTX	A	853.9	2.5	221	10.4	43	19.8	1.41296	6	0.9396	0.865733	0.0738671	0.00545635
13	PTX	A	853.9	2.5	221	10.4	43	19.8	1.41296	6	0.958815	0.865733	0.0930818	0.00866422
14	PTX	A	853.9	2.5	221	10.4	52	19.3	0.739	0	-0.0198771	-0.00490546	0.0149717	0.000224151
14	PTX	A	853.9	2.5	221	10.4	52	19.3	0.739	0	0.0317418	-0.00490546	0.0366472	0.00134302
14	PTX	A	853.9	2.5	221	10.4	52	19.3	0.739	0	0.00933581	-0.00490546	0.0142413	0.000202814
14	PTX	A	853.9	2.5	221	10.4	52	19.3	0.739	0	-0.00685379	-0.00490546	0.00194833	3.79599e-06
14	PTX	A	853.9	2.5	221	10.4	52	19.3	0.739	0	-0.00585647	-0.00490546	0.000951003	9.04407e-07
14	PTX	A	853.9	2.5	221	10.4	52	19.3	0.739	0	-0.00849018	-0.00490546	0.00358472	1.28502e-05
14	PTX	A	853.9	2.5	221	10.4	52	19.3	0.739	1	0.00241263	0.0136701	0.0112575	0.00012673
14	PTX	A	853.9	2.5	221	10.4	52	19.3	0.739	1	-0.00744444	0.0136701	0.0211145	0.000445823
14	PTX	A	853.9	2.5	221	10.4	52	19.3	0.739	1	-0.0020124	0.0136701	0.0156825	0.00024594
14	PTX	A	853.9	2.5	221	10.4	52	19.3	0.739	3	0.0656896	0.0810796	0.01539	0.000236853
14	PTX	A	853.9	2.5	221	10.4	52	19.3	0.739	3	0.0896835	0.0810796	0.0086039	7.4027e-05
14	PTX	A	853.9	2.5	221	10.4	52	19.3	0.739	6	0.233996	0.219109	0.0148861	0.000221596
14	PTX	A	853.9	2.5	221	10.4	52	19.3	0.739	9	0.183306	0.30665	0.123344	0.0152137
14	PTX	A	853.9	2.5	221	10.4	52	19.3	0.739	9	0.55391	0.30665	0.24726	0.0611374
14	PTX	A	853.9	2.5	221	10.4	52	19.3	0.739	9	0.249062	0.30665	0.057588	0.00331637
14	PTX	A	853.9	2.5	221	10.4	52	19.3	0.739	12	0.408121	0.393033	0.0150884	0.000227659
14	PTX	A	853.9	2.5	221	10.4	52	19.3	0.739	12	0.536263	0.393033	0.14323	0.0205149
14	PTX	A	853.9	2.5	221	10.4	52	19.3	0.739	12	0.305096	0.393033	0.0879364	0.0077328
14	PTX	A	853.9	2.5	221	10.4	52	19.3	0.739	15	0.479057	0.535054	0.0559968	0.00313564
14	PTX	A	853.9	2.5	221	10.4	52	19.3	0.739	15	0.417107	0.535054	0.117947	0.0139115
14	PTX	A	853.9	2.5	221	10.4	52	19.3	0.739	15	0.560964	0.535054	0.0259098	0.000671316
14	PTX	A	853.9	2.5	221	10.4	52	19.3	0.739	18	0.580319	0.621171	0.0408515	0.00166885
14	PTX	A	853.9	2.5	221	10.4	52	19.3	0.739	18	0.44295	0.621171	0.178221	0.0317627
14	PTX	A	853.9	2.5	221	10.4	52	19.3	0.739	18	0.625431	0.621171	0.00426055	1.81523e-05
14	PTX	A	853.9	2.5	221	10.4	52	19.3	0.739	21	0.706254	0.653389	0.0528646	0.00279467
14	PTX	A	853.9	2.5	221	10.4	52	19.3	0.739	21	0.634223	0.653389	0.0191656	0.000367319
14	PTX	A	853.9	2.5	221	10.4	52	19.3	0.739	21	0.750891	0.653389	0.0975022	0.00950668
14	PTX	A	853.9	2.5	221	10.4	52	19.3	0.739	28	0.829661	0.836519	0.00685857	4.70399e-05
14	PTX	A	853.9	2.5	221	10.4	52	19.3	0.739	28	0.739746	0.836519	0.0967728	0.00936498
14	PTX	A	853.9	2.5	221	10.4	52	19.3	0.739	28	0.94323	0.836519	0.106711	0.0113872
14	PTX	A	853.9	2.5	221	10.4	52	19.3	0.739	35	0.828789	0.92157	0.092781	0.00860831
14	PTX	A	853.9	2.5	221	10.4	52	19.3	0.739	35	0.970216	0.92157	0.0486457	0.0023664
14	PTX	A	853.9	2.5	221	10.4	52	19.3	0.739	35	0.966478	0.92157	0.0449081	0.00201674
15	PTX	A	853.9	2.5	221	10.4	52	19.9	0.737	0	-0.0123219	-0.000784519	0.0115374	0.000133111
15	PTX	A	853.9	2.5	221	10.4	52	19.9	0.737	0	0.0329909	-0.000784519	0.0337754	0.00114078
15	PTX	A	853.9	2.5	221	10.4	52	19.9	0.737	0	0.00880536	-0.000784519	0.00958988	9.19658e-05
15	PTX	A	853.9	2.5	221	10.4	52	19.9	0.737	1	-0.02376	0.0167222	0.0404822	0.00163881
15	PTX	A	853.9	2.5	221	10.4	52	19.9	0.737	1	0.0389578	0.0167222	0.0222355	0.00049442
15	PTX	A	853.9	2.5	221	10.4	52	19.9	0.737	1	0.0150154	0.0167222	0.00170681	2.91318e-06
15	PTX	A	853.9	2.5	221	10.4	52	19.9	0.737	3	0.0800058	0.0813366	0.00133079	1.771e-06
15	PTX	A	853.9	2.5	221	10.4	52	19.9	0.737	3	0.0893396	0.0813366	0.00800299	6.40478e-05
15	PTX	A	853.9	2.5	221	10.4	52	19.9	0.737	3	0.0575037	0.0813366	0.0238329	0.000568005
15	PTX	A	853.9	2.5	221	10.4	52	19.9	0.737	6	0.25991	0.218877	0.0410334	0.00168374
15	PTX	A	853.9	2.5	221	10.4	52	19.9	0.737	6	0.338817	0.218877	0.11994	0.0143857
15	PTX	A	853.9	2.5	221	10.4	52	19.9	0.737	6	0.0914158	0.218877	0.127461	0.0162463
15	PTX	A	853.9	2.5	221	10.4	52	19.9	0.737	9	0.424748	0.322714	0.102033	0.0104108
15	PTX	A	853.9	2.5	221	10.4	52	19.9	0.737	9	0.132286	0.322714	0.190428	0.0362629
15	PTX	A	853.9	2.5	221	10.4	52	19.9	0.737	9	0.356549	0.322714	0.033835	0.00114481
15	PTX	A	853.9	2.5	221	10.4	52	19.9	0.737	12	0.509939	0.464158	0.0457818	0.00209598
15	PTX	A	853.9	2.5	221	10.4	52	19.9	0.737	12	0.307121	0.464158	0.157036	0.0246603
15	PTX	A	853.9	2.5	221	10.4	52	19.9	0.737	12	0.418706	0.464158	0.0454516	0.00206585
15	PTX	A	853.9	2.5	221	10.4	52	19.9	0.737	15	0.637002	0.680271	0.0432687	0.00187218
15	PTX	A	853.9	2.5	221	10.4	52	19.9	0.737	15	0.941706	0.680271	0.261435	0.0683483
15	PTX	A	853.9	2.5	221	10.4	52	19.9	0.737	18	0.846797	0.774069	0.072728	0.00528937
15	PTX	A	853.9	2.5	221	10.4	52	19.9	0.737	18	0.914902	0.774069	0.140833	0.0198339
15	PTX	A	853.9	2.5	221	10.4	52	19.9	0.737	18	0.785155	0.774069	0.0110858	0.000122896
15	PTX	A	853.9	2.5	221	10.4	52	19.9	0.737	21	0.661291	0.743751	0.0824601	0.00679968
15	PTX	A	853.9	2.5	221	10.4	52	19.9	0.737	21	0.692341	0.743751	0.0514099	0.00264298
15	PTX	A	853.9	2.5	221	10.4	52	19.9	0.737	21	0.718687	0.743751	0.025064	0.000628202
15	PTX	A	853.9	2.5	221	10.4	52	19.9	0.737	28	0.924385	0.856214	0.0681712	0.00464731
15	PTX	A	853.9	2.5	221	10.4	52	19.9	0.737	28	0.730639	0.856214	0.125575	0.015769
15	PTX	A	853.9	2.5	221	10.4	52	19.9	0.737	28	0.920485	0.856214	0.0642712	0.00413079
15	PTX	A	853.9	2.5	221	10.4	52	19.9	0.737	35	0.988108	0.929494	0.0586141	0.00343561
15	PTX	A	853.9	2.5	221	10.4	52	19.9	0.737	35	0.961931	0.929494	0.0324365	0.00105213
15	PTX	A	853.9	2.5	221	10.4	52	19.9	0.737	35	0.854358	0.929494	0.0751357	0.00564538
16	PTX	A	853.9	2.5	221	10.4	61	18.4	0.499	0	0.0191541	-0.000924417	0.0200785	0.000403146
16	PTX	A	853.9	2.5	221	10.4	61	18.4	0.499	0	0.0140027	-0.000924417	0.0149272	0.00022282
16	PTX	A	853.9	2.5	221	10.4	61	18.4	0.499	0	-0.00304643	-0.000924417	0.00212201	4.50294e-06
16	PTX	A	853.9	2.5	221	10.4	61	18.4	0.499	0	-0.0276956	-0.000924417	0.0267712	0.000716696
16	PTX	A	853.9	2.5	221	10.4	61	18.4	0.499	0	-0.0182363	-0.000924417	0.0173118	0.0002997
16	PTX	A	853.9	2.5	221	10.4	61	18.4	0.499	0.0833333	0.00266372	-0.00102674	0.00369046	1.36195e-05
16	PTX	A	853.9	2.5	221	10.4	61	18.4	0.499	0.0833333	0.010345	-0.00102674	0.0113717	0.000129316
16	PTX	A	853.9	2.5	221	10.4	61	18.4	0.499	0.0833333	-0.00175606	-0.00102674	0.000729317	5.31903e-07
16	PTX	A	853.9	2.5	221	10.4	61	18.4	0.499	0.166667	0.0131798	-0.00111761	0.0142974	0.000204415
16	PTX	A	853.9	2.5	221	10.4	61	18.4	0.499	0.166667	0.00911559	-0.00111761	0.0102332	0.000104718
16	PTX	A	853.9	2.5	221	10.4	61	18.4	0.499	1	-0.0380491	-0.00122502	0.036824	0.00135601
16	PTX	A	853.9	2.5	221	10.4	61	18.4	0.499	3	0.0183717	0.00655817	0.0118136	0.00013956
16	PTX	A	853.9	2.5	221	10.4	61	18.4	0.499	3	0.00689046	0.00655817	0.000332289	1.10416e-07
16	PTX	A	853.9	2.5	221	10.4	61	18.4	0.499	6	0.027892	0.0374473	0.00955523	9.13024e-05
16	PTX	A	853.9	2.5	221	10.4	61	18.4	0.499	6	0.0206375	0.0374473	0.0168098	0.000282568
16	PTX	A	853.9	2.5	221	10.4	61	18.4	0.499	6	0.0557621	0.0374473	0.0183148	0.000335432
16	PTX	A	853.9	2.5	221	10.4	61	18.4	0.499	9	0.0855118	0.080414	0.00509778	2.59874e-05
16	PTX	A	853.9	2.5	221	10.4	61	18.4	0.499	9	0.089393	0.080414	0.00897906	8.06235e-05
16	PTX	A	853.9	2.5	221	10.4	61	18.4	0.499	9	0.0687369	0.080414	0.0116771	0.000136354
16	PTX	A	853.9	2.5	221	10.4	61	18.4	0.499	12	0.112142	0.109398	0.00274411	7.53014e-06
16	PTX	A	853.9	2.5	221	10.4	61	18.4	0.499	12	0.131488	0.109398	0.0220895	0.000487948
16	PTX	A	853.9	2.5	221	10.4	61	18.4	0.499	12	0.106402	0.109398	0.00299652	8.97916e-06
16	PTX	A	853.9	2.5	221	10.4	61	18.4	0.499	15	0.175574	0.133588	0.0419859	0.00176282
16	PTX	A	853.9	2.5	221	10.4	61	18.4	0.499	15	0.102561	0.133588	0.0310268	0.000962664
16	PTX	A	853.9	2.5	221	10.4	61	18.4	0.499	15	0.0849021	0.133588	0.0486856	0.00237029
16	PTX	A	853.9	2.5	221	10.4	61	18.4	0.499	18	0.20197	0.189625	0.0123457	0.000152416
16	PTX	A	853.9	2.5	221	10.4	61	18.4	0.499	18	0.203535	0.189625	0.0139104	0.000193499
16	PTX	A	853.9	2.5	221	10.4	61	18.4	0.499	21	0.298992	0.237859	0.061133	0.00373725
16	PTX	A	853.9	2.5	221	10.4	61	18.4	0.499	21	0.191698	0.237859	0.046161	0.00213084
16	PTX	A	853.9	2.5	221	10.4	61	18.4	0.499	21	0.217607	0.237859	0.0202519	0.00041014
16	PTX	A	853.9	2.5	221	10.4	61	18.4	0.499	28	0.305241	0.306317	0.00107639	1.15861e-06
19	PTX	A	853.9	2.5	221	10.4	61	27.7	0.876	0	0.024703	-0.00538454	0.0300875	0.000905258
19	PTX	A	853.9	2.5	221	10.4	61	27.7	0.876	0	0.0223721	-0.00538454	0.0277566	0.00077043
19	PTX	A	853.9	2.5	221	10.4	61	27.7	0.876	0	-0.00140088	-0.00538454	0.00398366	1.58695e-05
19	PTX	A	853.9	2.5	221	10.4	61	27.7	0.876	0	-0.00965482	-0.00538454	0.00427029	1.82353e-05
19	PTX	A	853.9	2.5	221	10.4	61	27.7	0.876	0	-0.0342048	-0.00538454	0.0288202	0.000830605
19	PTX	A	853.9	2.5	221	10.4	61	27.7	0.876	0	-0.00181459	-0.00538454	0.00356995	1.27445e-05
19	PTX	A	853.9	2.5	221	10.4	61	27.7	0.876	0.0833333	0.0104755	-0.00585773	0.0163332	0.000266775
19	PTX	A	853.9	2.5	221	10.4	61	27.7	0.876	0.0833333	0.0131696	-0.00585773	0.0190274	0.000362041
19	PTX	A	853.9	2.5	221	10.4	61	27.7	0.876	0.0833333	-0.027313	-0.00585773	0.0214553	0.000460329
19	PTX	A	853.9	2.5	221	10.4	61	27.7	0.876	0.166667	0.0179929	-0.00631411	0.024307	0.000590828
19	PTX	A	853.9	2.5	221	10.4	61	27.7	0.876	0.166667	-0.00731385	-0.00631411	0.000999747	9.99495e-07
19	PTX	A	853.9	2.5	221	10.4	61	27.7	0.876	0.166667	-0.0237007	-0.00631411	0.0173865	0.000302292
19	PTX	A	853.9	2.5	221	10.4	61	27.7	0.876	1	-0.0377868	-0.00964385	0.028143	0.000792028
19	PTX	A	853.9	2.5	221	10.4	61	27.7	0.876	1	-0.0435182	-0.00964385	0.0338743	0.00114747
19	PTX	A	853.9	2.5	221	10.4	61	27.7	0.876	1	-0.0249418	-0.00964385	0.0152979	0.000234026
19	PTX	A	853.9	2.5	221	10.4	61	27.7	0.876	3	-0.00840362	-0.00628458	0.00211903	4.4903e-06
19	PTX	A	853.9	2.5	221	10.4	61	27.7	0.876	3	0.0200513	-0.00628458	0.0263359	0.000693578
19	PTX	A	853.9	2.5	221	10.4	61	27.7	0.876	3	-0.000169855	-0.00628458	0.00611473	3.73899e-05
19	PTX	A	853.9	2.5	221	10.4	61	27.7	0.876	6	0.0200917	0.013759	0.0063327	4.01031e-05
19	PTX	A	853.9	2.5	221	10.4	61	27.7	0.876	6	-0.00255119	0.013759	0.0163101	0.000266021
19	PTX	A	853.9	2.5	221	10.4	61	27.7	0.876	9	0.0700088	0.0400952	0.0299136	0.000894826
19	PTX	A	853.9	2.5	221	10.4	61	27.7	0.876	9	0.0447122	0.0400952	0.00461703	2.1317e-05
19	PTX	A	853.9	2.5	221	10.4	61	27.7	0.876	9	0.0216254	0.0400952	0.0184698	0.000341133
19	PTX	A	853.9	2.5	221	10.4	61	27.7	0.876	12	0.0741863	0.0756616	0.0014753	2.17652e-06
19	PTX	A	853.9	2.5	221	10.4	61	27.7	0.876	12	0.044692	0.0756616	0.0309695	0.000959111
19	PTX	A	853.9	2.5	221	10.4	61	27.7	0.876	12	0.0828236	0.0756616	0.00716207	5.12953e-05
19	PTX	A	853.9	2.5	221	10.4	61	27.7	0.876	15	0.121329	0.133575	0.0122468	0.000149985
19	PTX	A	853.9	2.5	221	10.4	61	27.7	0.876	15	0.180246	0.133575	0.046671	0.00217818
19	PTX	A	853.9	2.5	221	10.4	61	27.7	0.876	15	0.116384	0.133575	0.0171911	0.000295535
19	PTX	A	853.9	2.5	221	10.4	61	27.7	0.876	18	0.178006	0.180426	0.00241956	5.85429e-06
19	PTX	A	853.9	2.5	221	10.4	61	27.7	0.876	21	0.215169	0.212274	0.00289526	8.38253e-06
19	PTX	A	853.9	2.5	221	10.4	61	27.7	0.876	21	0.192163	0.212274	0.0201108	0.000404446
19	PTX	A	853.9	2.5	221	10.4	61	27.7	0.876	21	0.230002	0.212274	0.0177281	0.000314287
19	PTX	A	853.9	2.5	221	10.4	61	27.7	0.876	28	0.362176	0.371282	0.00910599	8.29191e-05
19	PTX	A	853.9	2.5	221	10.4	61	27.7	0.876	35	0.772038	0.647208	0.12483	0.0155825
19	PTX	A	853.9	2.5	221	10.4	61	27.7	0.876	35	0.543571	0.647208	0.103637	0.0107406
20	RESI	B	314.4	1.3	86.2	14.63	31	9.49	1.215	0	0.0845222	0.0350705	0.0494518	0.00244548
20	RESI	B	314.4	1.3	86.2	14.63	31	9.49	1.215	0	0.129383	0.0350705	0.0943128	0.0088949
20	RESI	B	314.4	1.3	86.2	14.63	31	9.49	1.215	0	-0.0379609	0.0350705	0.0730314	0.00533358
20	RESI	B	314.4	1.3	86.2	14.63	31	9.49	1.215	0	-0.0382325	0.0350705	0.073303	0.00537333
20	RESI	B	314.4	1.3	86.2	14.63	31	9.49	1.215	0	-0.0808698	0.0350705	0.11594	0.0134422
20	RESI	B	314.4	1.3	86.2	14.63	31	9.49	1.215	0.166667	0.140464	0.055723	0.0847411	0.00718105
20	RESI	B	314.4	1.3	86.2	14.63	31	9.49	1.215	0.166667	0.0440548	0.055723	0.0116682	0.000136146
20	RESI	B	314.4	1.3	86.2	14.63	31	9.49	1.215	0.166667	0.0864206	0.055723	0.0306976	0.000942343
20	RESI	B	314.4	1.3	86.2	14.63	31	9.49	1.215	1	0.103258	0.165925	0.0626669	0.00392714
20	RESI	B	314.4	1.3	86.2	14.63	31	9.49	1.215	1	0.199124	0.165925	0.0331992	0.00110219
20	RESI	B	314.4	1.3	86.2	14.63	31	9.49	1.215	3	0.411496	0.45476	0.0432635	0.00187173
20	RESI	B	314.4	1.3	86.2	14.63	31	9.49	1.215	3	0.480476	0.45476	0.0257166	0.000661344
20	RESI	B	314.4	1.3	86.2	14.63	31	9.49	1.215	5	0.574713	0.711261	0.136548	0.0186455
20	RESI	B	314.4	1.3	86.2	14.63	31	9.49	1.215	5	0.90685	0.711261	0.195588	0.0382548
20	RESI	B	314.4	1.3	86.2	14.63	31	9.49	1.215	5	0.74662	0.711261	0.0353588	0.00125025
20	RESI	B	314.4	1.3	86.2	14.63	31	9.49	1.215	7	0.823321	0.873615	0.0502943	0.00252951
20	RESI	B	314.4	1.3	86.2	14.63	31	9.49	1.215	7	0.897315	0.873615	0.0237003	0.000561705
20	RESI	B	314.4	1.3	86.2	14.63	31	9.49	1.215	14	0.990271	0.99609	0.00581835	3.38532e-05
20	RESI	B	314.4	1.3	86.2	14.63	31	9.49	1.215	14	0.999218	0.99609	0.00312777	9.78293e-06
20	RESI	B	314.4	1.3	86.2	14.63	31	9.49	1.215	21	0.96685	0.967194	0.000344449	1.18645e-07
20	RESI	B	314.4	1.3	86.2	14.63	31	9.49	1.215	21	0.96998	0.967194	0.00278539	7.7584e-06
20	RESI	B	314.4	1.3	86.2	14.63	31	9.49	1.215	21	0.985133	0.967194	0.017939	0.000321809
21	RESI	B	314.4	1.3	86.2	14.63	43.5	8.05	2.57	0	-0.0323238	0.0533901	0.0857139	0.00734687
21	RESI	B	314.4	1.3	86.2	14.63	43.5	8.05	2.57	0	-0.00159692	0.0533901	0.054987	0.00302357
21	RESI	B	314.4	1.3	86.2	14.63	43.5	8.05	2.57	0	0.0129405	0.0533901	0.0404496	0.00163617
21	RESI	B	314.4	1.3	86.2	14.63	43.5	8.05	2.57	0	0.176817	0.0533901	0.123427	0.0152342
21	RESI	B	314.4	1.3	86.2	14.63	43.5	8.05	2.57	0.166667	0.0654736	0.0670843	0.00161072	2.59441e-06
21	RESI	B	314.4	1.3	86.2	14.63	43.5	8.05	2.57	0.166667	0.0363987	0.0670843	0.0306856	0.000941606
21	RESI	B	314.4	1.3	86.2	14.63	43.5	8.05	2.57	0.166667	0.0446586	0.0670843	0.0224257	0.000502912
21	RESI	B	314.4	1.3	86.2	14.63	43.5	8.05	2.57	1	0.215474	0.134574	0.0808997	0.00654477
21	RESI	B	314.4	1.3	86.2	14.63	43.5	8.05	2.57	1	0.177478	0.134574	0.0429041	0.00184076
21	RESI	B	314.4	1.3	86.2	14.63	43.5	8.05	2.57	1	0.0938877	0.134574	0.0406862	0.00165536
21	RESI	B	314.4	1.3	86.2	14.63	43.5	8.05	2.57	2	0.178139	0.206956	0.0288175	0.000830449
21	RESI	B	314.4	1.3	86.2	14.63	43.5	8.05	2.57	2	0.218117	0.206956	0.0111605	0.000124556
21	RESI	B	314.4	1.3	86.2	14.63	43.5	8.05	2.57	2	0.248844	0.206956	0.0418873	0.00175455
21	RESI	B	314.4	1.3	86.2	14.63	43.5	8.05	2.57	3	0.296751	0.262539	0.0342125	0.00117049
21	RESI	B	314.4	1.3	86.2	14.63	43.5	8.05	2.57	3	0.246861	0.262539	0.0156774	0.000245781
21	RESI	B	314.4	1.3	86.2	14.63	43.5	8.05	2.57	5	0.361178	0.318197	0.0429818	0.00184743
21	RESI	B	314.4	1.3	86.2	14.63	43.5	8.05	2.57	5	0.190694	0.318197	0.127503	0.016257
21	RESI	B	314.4	1.3	86.2	14.63	43.5	8.05	2.57	5	0.453029	0.318197	0.134832	0.0181797
21	RESI	B	314.4	1.3	86.2	14.63	43.5	8.05	2.57	7	0.286839	0.34498	0.0581412	0.0033804
21	RESI	B	314.4	1.3	86.2	14.63	43.5	8.05	2.57	10	0.555121	0.515391	0.0397304	0.00157851
21	RESI	B	314.4	1.3	86.2	14.63	43.5	8.05	2.57	10	0.324835	0.515391	0.190556	0.0363116
21	RESI	B	314.4	1.3	86.2	14.63	43.5	8.05	2.57	10	0.578579	0.515391	0.0631886	0.0039928
21	RESI	B	314.4	1.3	86.2	14.63	43.5	8.05	2.57	14	0.956107	0.924191	0.0319157	0.00101861
21	RESI	B	314.4	1.3	86.2	14.63	43.5	8.05	2.57	14	0.966845	0.924191	0.0426535	0.00181932
21	RESI	B	314.4	1.3	86.2	14.63	43.5	8.05	2.57	14	0.975006	0.924191	0.0508143	0.0025821
21	RESI	B	314.4	1.3	86.2	14.63	43.5	8.05	2.57	17	0.961063	0.986495	0.0254319	0.000646779
21	RESI	B	314.4	1.3	86.2	14.63	43.5	8.05	2.57	17	0.973717	0.986495	0.0127777	0.000163269
21	RESI	B	314.4	1.3	86.2	14.63	43.5	8.05	2.57	17	0.985347	0.986495	0.00114772	1.31725e-06
22	RESI	B	314.4	1.3	86.2	14.63	49	8.4	1.80507	0	-0.108912	0.0448623	0.153774	0.0236465
22	RESI	B	314.4	1.3	86.2	14.63	49	8.4	1.80507	0	-0.0510881	0.0448623	0.0959504	0.00920647
22	RESI	B	314.4	1.3	86.2	14.63	49	8.4	1.80507	0	0.0881865	0.0448623	0.0433243	0.00187699
22	RESI	B	314.4	1.3	86.2	14.63	49	8.4	1.80507	0	0.0829016	0.0448623	0.0380393	0.00144699
22	RESI	B	314.4	1.3	86.2	14.63	49	8.4	1.80507	0	0.0194819	0.0448623	0.0253804	0.000644165
22	RESI	B	314.4	1.3	86.2	14.63	49	8.4	1.80507	0.166667	0.126736	0.0562961	0.0704396	0.00496174
22	RESI	B	314.4	1.3	86.2	14.63	49	8.4	1.80507	0.166667	0.145389	0.0562961	0.0890925	0.00793747
22	RESI	B	314.4	1.3	86.2	14.63	49	8.4	1.80507	1	0.181451	0.111049	0.0704022	0.00495647
22	RESI	B	314.4	1.3	86.2	14.63	49	8.4	1.80507	1	0.136995	0.111049	0.0259462	0.000673206
22	RESI	B	314.4	1.3	86.2	14.63	49	8.4	1.80507	3	0.127358	0.216546	0.0891887	0.00795462
22	RESI	B	314.4	1.3	86.2	14.63	49	8.4	1.80507	3	0.28715	0.216546	0.0706041	0.00498494
22	RESI	B	314.4	1.3	86.2	14.63	49	8.4	1.80507	3	0.209119	0.216546	0.00742699	5.51602e-05
22	RESI	B	314.4	1.3	86.2	14.63	49	8.4	1.80507	7	0.287772	0.330127	0.0423553	0.00179397
22	RESI	B	314.4	1.3	86.2	14.63	49	8.4	1.80507	7	0.273782	0.330127	0.0563449	0.00317475
22	RESI	B	314.4	1.3	86.2	14.63	49	8.4	1.80507	7	0.370777	0.330127	0.0406499	0.00165241
22	RESI	B	314.4	1.3	86.2	14.63	49	8.4	1.80507	14	0.464974	0.444644	0.02033	0.00041331
22	RESI	B	314.4	1.3	86.2	14.63	49	8.4	1.80507	14	0.385389	0.444644	0.0592555	0.00351121
22	RESI	B	314.4	1.3	86.2	14.63	49	8.4	1.80507	28	0.868808	0.796197	0.0726112	0.00527239
22	RESI	B	314.4	1.3	86.2	14.63	49	8.4	1.80507	28	0.759378	0.796197	0.0368189	0.00135563
22	RESI	B	314.4	1.3	86.2	14.63	49	8.4	1.80507	28	0.757824	0.796197	0.0383733	0.00147251
24	RESI	A	314.4	1.3	86.2	14.63	59	8.38	0.375	0	-0.00740041	-0.0131809	0.00578045	3.34136e-05
24	RESI	A	314.4	1.3	86.2	14.63	59	8.38	0.375	0	-0.0392064	-0.0131809	0.0260256	0.00067733
24	RESI	A	314.4	1.3	86.2	14.63	59	8.38	0.375	0	-0.0499134	-0.0131809	0.0367325	0.00134928
24	RESI	A	314.4	1.3	86.2	14.63	59	8.38	0.375	0	0.00740041	-0.0131809	0.0205813	0.000423589
24	RESI	A	314.4	1.3	86.2	14.63	59	8.38	0.375	1	0.0688081	0.0248234	0.0439846	0.00193465
24	RESI	A	314.4	1.3	86.2	14.63	59	8.38	0.375	1	0.0316486	0.0248234	0.00682514	4.65826e-05
24	RESI	A	314.4	1.3	86.2	14.63	59	8.38	0.375	7	0.158873	0.0875343	0.0713384	0.00508916
24	RESI	A	314.4	1.3	86.2	14.63	59	8.38	0.375	7	0.0307038	0.0875343	0.0568304	0.0032297
24	RESI	A	314.4	1.3	86.2	14.63	59	8.38	0.375	14	0.126122	0.0946731	0.0314487	0.000989023
24	RESI	A	314.4	1.3	86.2	14.63	59	8.38	0.375	14	0.110376	0.0946731	0.0157032	0.00024659
24	RESI	A	314.4	1.3	86.2	14.63	59	8.38	0.375	14	0.0354275	0.0946731	0.0592456	0.00351005
24	RESI	A	314.4	1.3	86.2	14.63	59	8.38	0.375	21	0.145331	0.0949936	0.0503378	0.0025339
24	RESI	A	314.4	1.3	86.2	14.63	59	8.38	0.375	21	0.0439301	0.0949936	0.0510635	0.00260748
24	RESI	A	314.4	1.3	86.2	14.63	59	8.38	0.375	28	-0.0782554	0.000111462	0.0783669	0.00614136
24	RESI	A	314.4	1.3	86.2	14.63	59	8.38	0.375	35	0.207684	0.21832	0.0106358	0.00011312
24	RESI	A	314.4	1.3	86.2	14.63	59	8.38	0.375	35	0.164226	0.21832	0.0540935	0.00292611
24	RESI	A	314.4	1.3	86.2	14.63	59	8.38	0.375	42	0.15163	0.18678	0.0351503	0.00123554
24	RESI	A	314.4	1.3	86.2	14.63	59	8.38	0.375	42	0.265942	0.18678	0.0791624	0.00626669
24	RESI	A	314.4	1.3	86.2	14.63	59	8.38	0.375	42	0.112266	0.18678	0.0745142	0.00555236
24	RESI	A	314.4	1.3	86.2	14.63	59	8.38	0.375	56	0.230987	0.225889	0.00509855	2.59952e-05
24	RESI	A	314.4	1.3	86.2	14.63	59	8.38	0.375	56	0.199496	0.225889	0.0263926	0.000696567
24	RESI	A	314.4	1.3	86.2	14.63	59	8.38	0.375	56	0.212722	0.225889	0.0131663	0.000173351
24	RESI	A	314.4	1.3	86.2	14.63	59	8.38	0.375	63	0.234766	0.271921	0.0371552	0.00138051
24	RESI	A	314.4	1.3	86.2	14.63	59	8.38	0.375	63	0.299638	0.271921	0.0277165	0.000768203
23	RESI	B	314.4	1.3	86.2	14.63	60	8.88	0.901	0	0.0942576	0.0473362	0.0469214	0.00220162
23	RESI	B	314.4	1.3	86.2	14.63	60	8.88	0.901	0	0.122746	0.0473362	0.0754102	0.00568669
23	RESI	B	314.4	1.3	86.2	14.63	60	8.88	0.901	0	-0.156248	0.0473362	0.203584	0.0414464
23	RESI	B	314.4	1.3	86.2	14.63	60	8.88	0.901	0	0.117616	0.0473362	0.0702793	0.00493918
23	RESI	B	314.4	1.3	86.2	14.63	60	8.88	0.901	0.166667	0.0447339	0.0516805	0.00694657	4.82548e-05
23	RESI	B	314.4	1.3	86.2	14.63	60	8.88	0.901	1	0.045062	0.0699604	0.0248984	0.000619931
23	RESI	B	314.4	1.3	86.2	14.63	60	8.88	0.901	1	0.168806	0.0699604	0.0988451	0.00977036
23	RESI	B	314.4	1.3	86.2	14.63	60	8.88	0.901	1	0.093654	0.0699604	0.0236936	0.000561385
23	RESI	B	314.4	1.3	86.2	14.63	60	8.88	0.901	2	0.0554272	0.0846569	0.0292297	0.000854376
23	RESI	B	314.4	1.3	86.2	14.63	60	8.88	0.901	2	0.0592886	0.0846569	0.0253683	0.000643548
23	RESI	B	314.4	1.3	86.2	14.63	60	8.88	0.901	2	0.0904773	0.0846569	0.00582047	3.38779e-05
23	RESI	B	314.4	1.3	86.2	14.63	60	8.88	0.901	3	0.045062	0.0951108	0.0500488	0.00250489
23	RESI	B	314.4	1.3	86.2	14.63	60	8.88	0.901	7	0.133795	0.144606	0.0108111	0.00011688
23	RESI	B	314.4	1.3	86.2	14.63	60	8.88	0.901	7	0.151904	0.144606	0.00729772	5.32568e-05
23	RESI	B	314.4	1.3	86.2	14.63	60	8.88	0.901	14	0.163373	0.182925	0.0195524	0.000382296
23	RESI	B	314.4	1.3	86.2	14.63	60	8.88	0.901	14	0.198685	0.182925	0.0157598	0.000248371
23	RESI	B	314.4	1.3	86.2	14.63	60	8.88	0.901	21	0.099992	0.121416	0.0214239	0.000458983
23	RESI	B	314.4	1.3	86.2	14.63	60	8.88	0.901	21	0.130475	0.121416	0.00905928	8.20706e-05
23	RESI	B	314.4	1.3	86.2	14.63	60	8.88	0.901	28	0.00730741	0.0875551	0.0802477	0.0064397
23	RESI	B	314.4	1.3	86.2	14.63	60	8.88	0.901	28	0.0696849	0.0875551	0.0178703	0.000319347
23	RESI	B	314.4	1.3	86.2	14.63	60	8.88	0.901	28	0.119587	0.0875551	0.0320317	0.00102603
23	RESI	B	314.4	1.3	86.2	14.63	60	8.88	0.901	42	0.192955	0.17561	0.0173443	0.000300824
23	RESI	B	314.4	1.3	86.2	14.63	60	8.88	0.901	42	0.12731	0.17561	0.0483006	0.00233294
23	RESI	B	314.4	1.3	86.2	14.63	60	8.88	0.901	42	0.17038	0.17561	0.00523042	2.73573e-05
23	RESI	B	314.4	1.3	86.2	14.63	60	8.88	0.901	56	0.166518	0.236617	0.0700988	0.00491384
23	RESI	B	314.4	1.3	86.2	14.63	60	8.88	0.901	70	0.219391	0.232696	0.0133055	0.000177036
23	RESI	B	314.4	1.3	86.2	14.63	60	8.88	0.901	70	0.243154	0.232696	0.0104573	0.000109356
25	RBC	B	434.5	2.2	91.2	5.5	45.5	10.1	4.828	0	-0.0427016	0.11541	0.158111	0.0249992
25	RBC	B	434.5	2.2	91.2	5.5	45.5	10.1	4.828	0	0.0522496	0.11541	0.0631601	0.0039892
25	RBC	B	434.5	2.2	91.2	5.5	45.5	10.1	4.828	0	0.115081	0.11541	0.000329075	1.08291e-07
25	RBC	B	434.5	2.2	91.2	5.5	45.5	10.1	4.828	0	-0.141411	0.11541	0.256821	0.0659568
25	RBC	B	434.5	2.2	91.2	5.5	45.5	10.1	4.828	0.083	0.160707	0.14722	0.0134866	0.000181889
25	RBC	B	434.5	2.2	91.2	5.5	45.5	10.1	4.828	0.083	0.115081	0.14722	0.0321393	0.00103293
25	RBC	B	434.5	2.2	91.2	5.5	45.5	10.1	4.828	0.25	0.224595	0.211449	0.0131453	0.000172798
25	RBC	B	434.5	2.2	91.2	5.5	45.5	10.1	4.828	0.5	0.163643	0.307717	0.144074	0.0207574
25	RBC	B	434.5	2.2	91.2	5.5	45.5	10.1	4.828	0.5	0.320133	0.307717	0.0124163	0.000154163
25	RBC	B	434.5	2.2	91.2	5.5	45.5	10.1	4.828	1	0.487134	0.497514	0.0103793	0.00010773
25	RBC	B	434.5	2.2	91.2	5.5	45.5	10.1	4.828	1	0.633349	0.497514	0.135835	0.0184511
25	RBC	B	434.5	2.2	91.2	5.5	45.5	10.1	4.828	1.5	0.907633	0.677969	0.229663	0.0527452
25	RBC	B	434.5	2.2	91.2	5.5	45.5	10.1	4.828	1.5	0.887609	0.677969	0.209639	0.0439487
25	RBC	B	434.5	2.2	91.2	5.5	45.5	10.1	4.828	2	0.928126	0.84338	0.0847464	0.00718195
25	RBC	B	434.5	2.2	91.2	5.5	45.5	10.1	4.828	2	0.949618	0.84338	0.106238	0.0112865
25	RBC	B	434.5	2.2	91.2	5.5	45.5	10.1	4.828	2	0.95226	0.84338	0.108881	0.011855
25	RBC	B	434.5	2.2	91.2	5.5	45.5	10.1	4.828	3	0.992249	1.11743	0.125177	0.0156693
25	RBC	B	434.5	2.2	91.2	5.5	45.5	10.1	4.828	3	0.998121	1.11743	0.119305	0.0142337
26	RBC	B	434.5	2.2	91.2	5.5	51.6	7.82	2.186	0	-0.00387965	0.000382041	0.00426169	1.8162e-05
26	RBC	B	434.5	2.2	91.2	5.5	51.6	7.82	2.186	0	-0.0225608	0.000382041	0.0229429	0.000526375
26	RBC	B	434.5	2.2	91.2	5.5	51.6	7.82	2.186	0	-0.0198395	0.000382041	0.0202216	0.000408912
26	RBC	B	434.5	2.2	91.2	5.5	51.6	7.82	2.186	0	-0.000181319	0.000382041	0.00056336	3.17374e-07
26	RBC	B	434.5	2.2	91.2	5.5	51.6	7.82	2.186	0	0.0168627	0.000382041	0.0164807	0.000271612
26	RBC	B	434.5	2.2	91.2	5.5	51.6	7.82	2.186	0	-0.00395276	0.000382041	0.0043348	1.87905e-05
26	RBC	B	434.5	2.2	91.2	5.5	51.6	7.82	2.186	0	-0.013744	0.000382041	0.014126	0.000199545
26	RBC	B	434.5	2.2	91.2	5.5	51.6	7.82	2.186	1	0.232923	0.117906	0.115016	0.0132288
26	RBC	B	434.5	2.2	91.2	5.5	51.6	7.82	2.186	1	0.186868	0.117906	0.0689614	0.00475567
26	RBC	B	434.5	2.2	91.2	5.5	51.6	7.82	2.186	2	0.106736	0.252235	0.145499	0.0211699
26	RBC	B	434.5	2.2	91.2	5.5	51.6	7.82	2.186	2	0.0938655	0.252235	0.15837	0.0250809
26	RBC	B	434.5	2.2	91.2	5.5	51.6	7.82	2.186	2	0.190213	0.252235	0.0620218	0.0038467
26	RBC	B	434.5	2.2	91.2	5.5	51.6	7.82	2.186	3	0.137921	0.397042	0.259122	0.0671441
26	RBC	B	434.5	2.2	91.2	5.5	51.6	7.82	2.186	3	0.188007	0.397042	0.209036	0.0436959
26	RBC	B	434.5	2.2	91.2	5.5	51.6	7.82	2.186	3	0.149983	0.397042	0.24706	0.0610386
26	RBC	B	434.5	2.2	91.2	5.5	51.6	7.82	2.186	3	0.591717	0.397042	0.194675	0.0378983
26	RBC	B	434.5	2.2	91.2	5.5	51.6	7.82	2.186	3	0.657718	0.397042	0.260675	0.0679515
26	RBC	B	434.5	2.2	91.2	5.5	51.6	7.82	2.186	3	0.780797	0.397042	0.383755	0.147268
26	RBC	B	434.5	2.2	91.2	5.5	51.6	7.82	2.186	4	0.296784	0.536865	0.240081	0.0576389
26	RBC	B	434.5	2.2	91.2	5.5	51.6	7.82	2.186	4	0.788084	0.536865	0.251219	0.0631109
26	RBC	B	434.5	2.2	91.2	5.5	51.6	7.82	2.186	4	0.587666	0.536865	0.0508008	0.00258072
26	RBC	B	434.5	2.2	91.2	5.5	51.6	7.82	2.186	5	0.797261	0.655877	0.141384	0.0199894
26	RBC	B	434.5	2.2	91.2	5.5	51.6	7.82	2.186	5	0.74156	0.655877	0.0856825	0.0073415
26	RBC	B	434.5	2.2	91.2	5.5	51.6	7.82	2.186	5	0.52064	0.655877	0.135237	0.018289
26	RBC	B	434.5	2.2	91.2	5.5	51.6	7.82	2.186	6	0.836552	0.745942	0.0906098	0.00821014
26	RBC	B	434.5	2.2	91.2	5.5	51.6	7.82	2.186	6	0.60164	0.745942	0.144302	0.0208231
26	RBC	B	434.5	2.2	91.2	5.5	51.6	7.82	2.186	7	0.882408	0.807198	0.0752108	0.00565666
26	RBC	B	434.5	2.2	91.2	5.5	51.6	7.82	2.186	7	0.823371	0.807198	0.0161732	0.000261572
26	RBC	B	434.5	2.2	91.2	5.5	51.6	7.82	2.186	7	0.749828	0.807198	0.0573699	0.00329131
26	RBC	B	434.5	2.2	91.2	5.5	51.6	7.82	2.186	8	0.924515	0.844351	0.0801644	0.00642633
26	RBC	B	434.5	2.2	91.2	5.5	51.6	7.82	2.186	8	0.67357	0.844351	0.170781	0.0291662
26	RBC	B	434.5	2.2	91.2	5.5	51.6	7.82	2.186	8	0.949963	0.844351	0.105612	0.0111539
26	RBC	B	434.5	2.2	91.2	5.5	51.6	7.82	2.186	10	0.874503	0.876587	0.00208419	4.34383e-06
26	RBC	B	434.5	2.2	91.2	5.5	51.6	7.82	2.186	10	0.83998	0.876587	0.0366074	0.0013401
26	RBC	B	434.5	2.2	91.2	5.5	51.6	7.82	2.186	14	0.953341	0.913649	0.039691	0.00157538
26	RBC	B	434.5	2.2	91.2	5.5	51.6	7.82	2.186	14	0.913885	0.913649	0.000235947	5.56708e-08
26	RBC	B	434.5	2.2	91.2	5.5	51.6	7.82	2.186	21	0.910839	0.924143	0.0133042	0.000177002
26	RBC	B	434.5	2.2	91.2	5.5	51.6	7.82	2.186	21	0.895971	0.924143	0.0281724	0.000793684
26	RBC	B	434.5	2.2	91.2	5.5	51.6	7.82	2.186	21	0.962624	0.924143	0.0384806	0.00148075
26	RBC	B	434.5	2.2	91.2	5.5	51.6	7.82	2.186	28	0.927738	0.934471	0.00673256	4.53274e-05
26	RBC	B	434.5	2.2	91.2	5.5	51.6	7.82	2.186	28	0.917222	0.934471	0.0172491	0.000297531
26	RBC	B	434.5	2.2	91.2	5.5	51.6	7.82	2.186	28	0.980393	0.934471	0.0459226	0.00210888
27	RBC	B	434.5	2.2	91.2	5.5	66.3	7.79	5.463	0	-0.0298324	0.00983895	0.0396714	0.00157382
27	RBC	B	434.5	2.2	91.2	5.5	66.3	7.79	5.463	0	0.0201962	0.00983895	0.0103573	0.000107273
27	RBC	B	434.5	2.2	91.2	5.5	66.3	7.79	5.463	0	0.00532095	0.00983895	0.004518	2.04123e-05
27	RBC	B	434.5	2.2	91.2	5.5	66.3	7.79	5.463	0	-0.0390242	0.00983895	0.0488632	0.00238761
27	RBC	B	434.5	2.2	91.2	5.5	66.3	7.79	5.463	0	0.00609278	0.00983895	0.00374617	1.40338e-05
27	RBC	B	434.5	2.2	91.2	5.5	66.3	7.79	5.463	0	0.0372467	0.00983895	0.0274077	0.000751183
27	RBC	B	434.5	2.2	91.2	5.5	66.3	7.79	5.463	1	0.0270725	0.0284785	0.00140594	1.97668e-06
27	RBC	B	434.5	2.2	91.2	5.5	66.3	7.79	5.463	1	-0.00450234	0.0284785	0.0329808	0.00108774
27	RBC	B	434.5	2.2	91.2	5.5	66.3	7.79	5.463	1	0.129936	0.0284785	0.101458	0.0102937
27	RBC	B	434.5	2.2	91.2	5.5	66.3	7.79	5.463	7	0.0156354	0.0338004	0.018165	0.000329967
27	RBC	B	434.5	2.2	91.2	5.5	66.3	7.79	5.463	7	0.00665411	0.0338004	0.0271463	0.000736922
27	RBC	B	434.5	2.2	91.2	5.5	66.3	7.79	5.463	7	0.0667867	0.0338004	0.0329863	0.0010881
27	RBC	B	434.5	2.2	91.2	5.5	66.3	7.79	5.463	14	0.0548584	0.0754006	0.0205422	0.00042198
27	RBC	B	434.5	2.2	91.2	5.5	66.3	7.79	5.463	14	0.0704354	0.0754006	0.00496522	2.46534e-05
27	RBC	B	434.5	2.2	91.2	5.5	66.3	7.79	5.463	14	0.104677	0.0754006	0.029276	0.000857083
27	RBC	B	434.5	2.2	91.2	5.5	66.3	7.79	5.463	21	0.0818023	0.116946	0.0351433	0.00123505
27	RBC	B	434.5	2.2	91.2	5.5	66.3	7.79	5.463	21	0.153302	0.116946	0.0363562	0.00132178
27	RBC	B	434.5	2.2	91.2	5.5	66.3	7.79	5.463	28	0.166984	0.135315	0.0316689	0.00100292
27	RBC	B	434.5	2.2	91.2	5.5	66.3	7.79	5.463	28	0.104256	0.135315	0.0310598	0.000964713
27	RBC	B	434.5	2.2	91.2	5.5	66.3	7.79	5.463	35	0.24957	0.250514	0.000943489	8.90171e-07
27	RBC	B	434.5	2.2	91.2	5.5	66.3	7.79	5.463	35	0.286057	0.250514	0.035543	0.00126331
27	RBC	B	434.5	2.2	91.2	5.5	66.3	7.79	5.463	35	0.213996	0.250514	0.0365179	0.00133355
27	RBC	B	434.5	2.2	91.2	5.5	66.3	7.79	5.463	42	0.792939	0.556134	0.236805	0.0560767
27	RBC	B	434.5	2.2	91.2	5.5	66.3	7.79	5.463	42	0.43088	0.556134	0.125254	0.0156884
27	RBC	B	434.5	2.2	91.2	5.5	66.3	7.79	5.463	42	0.446948	0.556134	0.109185	0.0119215
27	RBC	B	434.5	2.2	91.2	5.5	66.3	7.79	5.463	49	0.760031	0.839238	0.0792076	0.00627385
27	RBC	B	434.5	2.2	91.2	5.5	66.3	7.79	5.463	49	0.854826	0.839238	0.0155872	0.000242961
27	RBC	B	434.5	2.2	91.2	5.5	66.3	7.79	5.463	49	0.921554	0.839238	0.0823155	0.00677584
27	RBC	B	434.5	2.2	91.2	5.5	66.3	7.79	5.463	56	0.808516	0.877806	0.0692897	0.00480106
27	RBC	B	434.5	2.2	91.2	5.5	66.3	7.79	5.463	56	0.941692	0.877806	0.0638862	0.00408144
27	RBC	B	434.5	2.2	91.2	5.5	66.3	7.79	5.463	63	0.911169	0.912579	0.00140995	1.98795e-06
27	RBC	B	434.5	2.2	91.2	5.5	66.3	7.79	5.463	63	0.937131	0.912579	0.0245516	0.000602782
28	RBC	B	434.5	2.2	91.2	5.5	51.6	19.5	2.099	0	0.088	0.0279734	0.0600266	0.00360319
28	RBC	B	434.5	2.2	91.2	5.5	51.6	19.5	2.099	0	0.007	0.0279734	0.0209734	0.000439884
28	RBC	B	434.5	2.2	91.2	5.5	51.6	19.5	2.099	0	-0.02	0.0279734	0.0479734	0.00230145
28	RBC	B	434.5	2.2	91.2	5.5	51.6	19.5	2.099	0	-0.03	0.0279734	0.0579734	0.00336092
28	RBC	B	434.5	2.2	91.2	5.5	51.6	19.5	2.099	1	0.061	0.0723279	0.0113279	0.00012832
28	RBC	B	434.5	2.2	91.2	5.5	51.6	19.5	2.099	1	0.043	0.0723279	0.0293279	0.000860123
28	RBC	B	434.5	2.2	91.2	5.5	51.6	19.5	2.099	1	0.209	0.0723279	0.136672	0.0186793
28	RBC	B	434.5	2.2	91.2	5.5	51.6	19.5	2.099	3	0.209	0.164606	0.0443937	0.0019708
28	RBC	B	434.5	2.2	91.2	5.5	51.6	19.5	2.099	3	0.099	0.164606	0.0656063	0.00430419
28	RBC	B	434.5	2.2	91.2	5.5	51.6	19.5	2.099	3	0.133	0.164606	0.0316063	0.000998959
28	RBC	B	434.5	2.2	91.2	5.5	51.6	19.5	2.099	3	0.195	0.164606	0.0303937	0.000923776
28	RBC	B	434.5	2.2	91.2	5.5	51.6	19.5	2.099	5	0.208508	0.268787	0.060279	0.00363355
28	RBC	B	434.5	2.2	91.2	5.5	51.6	19.5	2.099	5	0.334655	0.268787	0.0658682	0.00433861
28	RBC	B	434.5	2.2	91.2	5.5	51.6	19.5	2.099	5	0.205959	0.268787	0.0628274	0.00394728
28	RBC	B	434.5	2.2	91.2	5.5	51.6	19.5	2.099	7	0.397053	0.378835	0.0182176	0.000331881
28	RBC	B	434.5	2.2	91.2	5.5	51.6	19.5	2.099	7	0.435858	0.378835	0.0570232	0.00325164
28	RBC	B	434.5	2.2	91.2	5.5	51.6	19.5	2.099	11	0.492804	0.558717	0.0659131	0.00434454
28	RBC	B	434.5	2.2	91.2	5.5	51.6	19.5	2.099	11	0.429223	0.558717	0.129494	0.0167687
28	RBC	B	434.5	2.2	91.2	5.5	51.6	19.5	2.099	11	0.709246	0.558717	0.150529	0.0226589
28	RBC	B	434.5	2.2	91.2	5.5	51.6	19.5	2.099	14	0.594267	0.726275	0.132008	0.0174262
28	RBC	B	434.5	2.2	91.2	5.5	51.6	19.5	2.099	14	0.705279	0.726275	0.0209965	0.000440854
28	RBC	B	434.5	2.2	91.2	5.5	51.6	19.5	2.099	14	0.576678	0.726275	0.149598	0.0223795
28	RBC	B	434.5	2.2	91.2	5.5	51.6	19.5	2.099	14	0.907747	0.726275	0.181472	0.0329321
28	RBC	B	434.5	2.2	91.2	5.5	51.6	19.5	2.099	14	0.855015	0.726275	0.12874	0.0165739
28	RBC	B	434.5	2.2	91.2	5.5	51.6	19.5	2.099	18	0.94708	0.89523	0.0518501	0.00268844
28	RBC	B	434.5	2.2	91.2	5.5	51.6	19.5	2.099	18	0.858713	0.89523	0.0365171	0.0013335
28	RBC	B	434.5	2.2	91.2	5.5	51.6	19.5	2.099	18	0.908567	0.89523	0.0133365	0.000177863
28	RBC	B	434.5	2.2	91.2	5.5	51.6	19.5	2.099	21	0.94529	0.881454	0.0638355	0.00407497
28	RBC	B	434.5	2.2	91.2	5.5	51.6	19.5	2.099	21	0.812054	0.881454	0.0693999	0.00481635
29	SFN	A	464.8	4.1	92.4	7.2	45.5	5.2	1.87062	0	-0.0300735	-0.0382809	0.00820737	6.73609e-05
29	SFN	A	464.8	4.1	92.4	7.2	45.5	5.2	1.87062	0	-0.0171849	-0.0382809	0.021096	0.000445041
29	SFN	A	464.8	4.1	92.4	7.2	45.5	5.2	1.87062	0	0.054381	-0.0382809	0.0926619	0.00858622
29	SFN	A	464.8	4.1	92.4	7.2	45.5	5.2	1.87062	0	0.00689655	-0.0382809	0.0451774	0.002041
29	SFN	A	464.8	4.1	92.4	7.2	45.5	5.2	1.87062	0	0.0526851	-0.0382809	0.090966	0.00827481
29	SFN	A	464.8	4.1	92.4	7.2	45.5	5.2	1.87062	0	-0.0667044	-0.0382809	0.0284235	0.000807895
29	SFN	A	464.8	4.1	92.4	7.2	45.5	5.2	1.87062	0.25	0.0204635	-0.0213392	0.0418028	0.00174747
29	SFN	A	464.8	4.1	92.4	7.2	45.5	5.2	1.87062	0.25	0.0591295	-0.0213392	0.0804687	0.00647521
29	SFN	A	464.8	4.1	92.4	7.2	45.5	5.2	1.87062	1	0.0123233	0.0398221	0.0274987	0.00075618
29	SFN	A	464.8	4.1	92.4	7.2	45.5	5.2	1.87062	1	-0.154551	0.0398221	0.194373	0.0377807
29	SFN	A	464.8	4.1	92.4	7.2	45.5	5.2	1.87062	1	-0.0361786	0.0398221	0.0760007	0.00577611
29	SFN	A	464.8	4.1	92.4	7.2	45.5	5.2	1.87062	2	0.193103	0.151788	0.0413155	0.00170697
29	SFN	A	464.8	4.1	92.4	7.2	45.5	5.2	1.87062	2	0.0302996	0.151788	0.121488	0.0147594
29	SFN	A	464.8	4.1	92.4	7.2	45.5	5.2	1.87062	2	-0.0202374	0.151788	0.172025	0.0295927
29	SFN	A	464.8	4.1	92.4	7.2	45.5	5.2	1.87062	2.2	0.0882985	0.178275	0.0899761	0.0080957
29	SFN	A	464.8	4.1	92.4	7.2	45.5	5.2	1.87062	2.2	0.091351	0.178275	0.0869236	0.00755571
29	SFN	A	464.8	4.1	92.4	7.2	45.5	5.2	1.87062	2.2	0.0248728	0.178275	0.153402	0.0235321
29	SFN	A	464.8	4.1	92.4	7.2	45.5	5.2	1.87062	3	0.438327	0.292707	0.14562	0.0212052
29	SFN	A	464.8	4.1	92.4	7.2	45.5	5.2	1.87062	3	0.519729	0.292707	0.227022	0.051539
29	SFN	A	464.8	4.1	92.4	7.2	45.5	5.2	1.87062	3	0.49056	0.292707	0.197853	0.0391458
29	SFN	A	464.8	4.1	92.4	7.2	45.5	5.2	1.87062	4	0.16156	0.437991	0.276431	0.0764142
29	SFN	A	464.8	4.1	92.4	7.2	45.5	5.2	1.87062	4	0.680497	0.437991	0.242506	0.0588092
29	SFN	A	464.8	4.1	92.4	7.2	45.5	5.2	1.87062	4	0.384398	0.437991	0.0535935	0.00287226
29	SFN	A	464.8	4.1	92.4	7.2	45.5	5.2	1.87062	5	0.817524	0.566365	0.251159	0.0630809
29	SFN	A	464.8	4.1	92.4	7.2	45.5	5.2	1.87062	5	0.385076	0.566365	0.181289	0.0328656
30	TRM	A	615.4	3.4	102	12.6	45.5	4.5	0.917	0	0.0491928	0.00395678	0.0452361	0.0020463
30	TRM	A	615.4	3.4	102	12.6	45.5	4.5	0.917	0	0.0446168	0.00395678	0.04066	0.00165323
30	TRM	A	615.4	3.4	102	12.6	45.5	4.5	0.917	0	0.0122029	0.00395678	0.00824609	6.79981e-05
30	TRM	A	615.4	3.4	102	12.6	45.5	4.5	0.917	0	-0.00533876	0.00395678	0.00929554	8.6407e-05
30	TRM	A	615.4	3.4	102	12.6	45.5	4.5	0.917	0	-0.0842761	0.00395678	0.0882329	0.00778504
30	TRM	A	615.4	3.4	102	12.6	45.5	4.5	0.917	0.0416667	-0.0122029	0.0144489	0.0266518	0.000710316
30	TRM	A	615.4	3.4	102	12.6	45.5	4.5	0.917	0.0416667	0.0244057	0.0144489	0.00995686	9.9139e-05
30	TRM	A	615.4	3.4	102	12.6	45.5	4.5	0.917	0.0416667	0.0255498	0.0144489	0.0111009	0.00012323
30	TRM	A	615.4	3.4	102	12.6	45.5	4.5	0.917	0.125	0.0434727	0.0354268	0.00804598	6.47377e-05
30	TRM	A	615.4	3.4	102	12.6	45.5	4.5	0.917	0.125	0.0160163	0.0354268	0.0194105	0.000376767
30	TRM	A	615.4	3.4	102	12.6	45.5	4.5	0.917	0.25	0.211262	0.066849	0.144413	0.0208552
30	TRM	A	615.4	3.4	102	12.6	45.5	4.5	0.917	0.25	0	0.066849	0.066849	0.00446879
30	TRM	A	615.4	3.4	102	12.6	45.5	4.5	0.917	1	0.208212	0.25135	0.0431381	0.00186089
30	TRM	A	615.4	3.4	102	12.6	45.5	4.5	0.917	1	0.23338	0.25135	0.0179697	0.000322908
30	TRM	A	615.4	3.4	102	12.6	45.5	4.5	0.917	1	0.100292	0.25135	0.151057	0.0228183
30	TRM	A	615.4	3.4	102	12.6	45.5	4.5	0.917	3	0.751621	0.629925	0.121696	0.0148098
30	TRM	A	615.4	3.4	102	12.6	45.5	4.5	0.917	3	0.781747	0.629925	0.151821	0.0230497
30	TRM	A	615.4	3.4	102	12.6	45.5	4.5	0.917	7	0.438159	0.621332	0.183172	0.0335521
30	TRM	A	615.4	3.4	102	12.6	45.5	4.5	0.917	7	0.463328	0.621332	0.158004	0.0249652
30	TRM	A	615.4	3.4	102	12.6	45.5	4.5	0.917	7	0.808059	0.621332	0.186727	0.0348671

## Sheet: File S3 (Testing)
ID			Drug-Specific Parameters				Scaffold Specific Parameters				In Vitro
Scaffold #	Drug	Solvent	MW (g/mol)	LogP	PSA (Å)	pKa	%CAC	%Load (wt.)	Fd (µm)	Time (Days)	Observed F(t)	Predicted F(t)	AE	SE
1	DXR	A	579.15	1.27	206	8.2	47	3.81	0.63	0	0.0446207	0.0846546	0.0400338	0.00160271
1	DXR	A	579.15	1.27	206	8.2	47	3.81	0.63	0	0.0583348	0.0846546	0.0263198	0.00069273
1	DXR	A	579.15	1.27	206	8.2	47	3.81	0.63	1	0.804395	0.38142	0.422975	0.178908
2	DXR	A	579.15	1.27	206	8.2	50	4.32	0.548	1	0.337051	0.192151	0.1449	0.0209961
2	DXR	A	579.15	1.27	206	8.2	50	4.32	0.548	7	0.421468	0.584751	0.163283	0.0266612
2	DXR	A	579.15	1.27	206	8.2	50	4.32	0.548	14	0.819225	0.801336	0.0178886	0.000320003
2	DXR	A	579.15	1.27	206	8.2	50	4.32	0.548	21	1.0257	0.880373	0.145329	0.0211205
3	DXR	A	579.15	1.27	206	8.2	59	3.93	0.428	0	0.0972628	0.066175	0.0310878	0.000966452
3	DXR	A	579.15	1.27	206	8.2	59	3.93	0.428	3	0.382879	0.360019	0.0228605	0.000522603
3	DXR	A	579.15	1.27	206	8.2	59	3.93	0.428	3	0.363081	0.360019	0.00306259	9.37944e-06
3	DXR	A	579.15	1.27	206	8.2	59	3.93	0.428	14	0.554051	0.536767	0.0172839	0.000298733
3	DXR	A	579.15	1.27	206	8.2	59	3.93	0.428	21	0.620591	0.53144	0.0891514	0.00794798
3	DXR	A	579.15	1.27	206	8.2	59	3.93	0.428	28	0.775316	0.70212	0.0731958	0.00535763
3	DXR	A	579.15	1.27	206	8.2	59	3.93	0.428	28	0.616112	0.70212	0.0860082	0.00739741
4	ERL	A	393.4	3.3	74.7	5.42	47	9.52	1.042	0	0.00136784	-0.00298066	0.0043485	1.89095e-05
4	ERL	A	393.4	3.3	74.7	5.42	47	9.52	1.042	0	0.0271708	-0.00298066	0.0301514	0.000909108
4	ERL	A	393.4	3.3	74.7	5.42	47	9.52	1.042	1	0.16065	0.0802813	0.0803687	0.00645912
4	ERL	A	393.4	3.3	74.7	5.42	47	9.52	1.042	1	0.18514	0.0802813	0.104858	0.0109953
4	ERL	A	393.4	3.3	74.7	5.42	47	9.52	1.042	2	0.144302	0.164067	0.0197656	0.00039068
4	ERL	A	393.4	3.3	74.7	5.42	47	9.52	1.042	3	0.183498	0.255246	0.0717479	0.00514776
4	ERL	A	393.4	3.3	74.7	5.42	47	9.52	1.042	3	0.165968	0.255246	0.0892781	0.00797059
4	ERL	A	393.4	3.3	74.7	5.42	47	9.52	1.042	7	0.693582	0.755535	0.0619529	0.00383817
5	ERL	A	393.4	3.3	74.7	5.42	50	10.51	0.664	0	0.00830019	0.0142228	0.00592259	3.50771e-05
5	ERL	A	393.4	3.3	74.7	5.42	50	10.51	0.664	0	-0.00970165	0.0142228	0.0239244	0.000572378
5	ERL	A	393.4	3.3	74.7	5.42	50	10.51	0.664	0	-0.0237952	0.0142228	0.038018	0.00144537
5	ERL	A	393.4	3.3	74.7	5.42	50	10.51	0.664	1	0.112865	0.0338658	0.0789988	0.00624081
5	ERL	A	393.4	3.3	74.7	5.42	50	10.51	0.664	7	0.10525	0.127082	0.0218316	0.000476619
5	ERL	A	393.4	3.3	74.7	5.42	50	10.51	0.664	14	0.244213	0.166198	0.078015	0.00608634
5	ERL	A	393.4	3.3	74.7	5.42	50	10.51	0.664	14	0.260036	0.166198	0.0938386	0.00880569
5	ERL	A	393.4	3.3	74.7	5.42	50	10.51	0.664	21	0.410123	0.344517	0.0656061	0.00430417
5	ERL	A	393.4	3.3	74.7	5.42	50	10.51	0.664	38	0.72612	0.65901	0.0671096	0.0045037
5	ERL	A	393.4	3.3	74.7	5.42	50	10.51	0.664	49	0.665205	0.792292	0.127087	0.0161511
6	EVR	A	958.2	5.9	205	10.4	47	4.2	0.63475	2	0.599503	0.555215	0.0442881	0.00196144
6	EVR	A	958.2	5.9	205	10.4	47	4.2	0.63475	2	0.39716	0.555215	0.158055	0.0249813
6	EVR	A	958.2	5.9	205	10.4	47	4.2	0.63475	3	0.716157	0.727035	0.0108775	0.000118319
6	EVR	A	958.2	5.9	205	10.4	47	4.2	0.63475	5	0.975282	0.844151	0.131131	0.0171954
6	EVR	A	958.2	5.9	205	10.4	47	4.2	0.63475	5	0.977479	0.844151	0.133329	0.0177765
7	EVR	A	958.2	5.9	205	10.4	50	4.46	0.59495	0	0.0659156	-0.00447436	0.0703899	0.00495474
7	EVR	A	958.2	5.9	205	10.4	50	4.46	0.59495	3	0.300095	0.386089	0.0859935	0.00739489
7	EVR	A	958.2	5.9	205	10.4	50	4.46	0.59495	10	0.927206	0.686737	0.240469	0.0578255
8	EVR	A	958.2	5.9	205	10.4	59	4.42	0.44935	0	0.00920971	-0.0121272	0.0213369	0.000455263
8	EVR	A	958.2	5.9	205	10.4	59	4.42	0.44935	1	0.0468115	0.102116	0.0553043	0.00305857
8	EVR	A	958.2	5.9	205	10.4	59	4.42	0.44935	3	0.179562	0.248797	0.0692346	0.00479343
8	EVR	A	958.2	5.9	205	10.4	59	4.42	0.44935	14	0.477303	0.499572	0.0222692	0.000495916
8	EVR	A	958.2	5.9	205	10.4	59	4.42	0.44935	21	0.623132	0.552643	0.0704896	0.00496878
9	PTX	A	853.9	2.5	221	10.4	64.5	5.2	0.341	0.166667	0.0178575	0.00491771	0.0129398	0.000167437
9	PTX	A	853.9	2.5	221	10.4	64.5	5.2	0.341	1	0.0121686	0.0175319	0.00536324	2.87643e-05
9	PTX	A	853.9	2.5	221	10.4	64.5	5.2	0.341	9	0.183465	0.12664	0.0568253	0.00322911
9	PTX	A	853.9	2.5	221	10.4	64.5	5.2	0.341	12	0.223431	0.21077	0.0126615	0.000160314
9	PTX	A	853.9	2.5	221	10.4	64.5	5.2	0.341	18	0.317541	0.269452	0.0480891	0.00231256
9	PTX	A	853.9	2.5	221	10.4	64.5	5.2	0.341	21	0.359223	0.284618	0.0746045	0.00556583
9	PTX	A	853.9	2.5	221	10.4	64.5	5.2	0.341	35	0.443218	0.475201	0.0319831	0.00102292
10	PTX	A	853.9	2.5	221	10.4	45	10.6	0.723	0	0.0384014	0.0368188	0.00158254	2.50445e-06
10	PTX	A	853.9	2.5	221	10.4	45	10.6	0.723	2	0.233713	0.317603	0.0838907	0.00703765
10	PTX	A	853.9	2.5	221	10.4	45	10.6	0.723	4	0.675348	0.582415	0.0929329	0.00863652
10	PTX	A	853.9	2.5	221	10.4	45	10.6	0.723	5	0.564504	0.712105	0.147601	0.021786
11	PTX	A	853.9	2.5	221	10.4	50	7.68	0.5	0	-0.0704137	-0.0139329	0.0564808	0.00319008
11	PTX	A	853.9	2.5	221	10.4	50	7.68	0.5	7	0.149334	0.127313	0.0220204	0.000484896
11	PTX	A	853.9	2.5	221	10.4	50	7.68	0.5	35	0.849207	0.639082	0.210124	0.0441523
12	PTX	A	853.9	2.5	221	10.4	60	8.22	0.715	0	0.00665061	0.0182306	0.01158	0.000134097
12	PTX	A	853.9	2.5	221	10.4	60	8.22	0.715	14	0.159857	0.218616	0.058759	0.00345261
12	PTX	A	853.9	2.5	221	10.4	60	8.22	0.715	21	0.171006	0.224055	0.053049	0.0028142
12	PTX	A	853.9	2.5	221	10.4	60	8.22	0.715	28	0.205788	0.247206	0.041418	0.00171545
12	PTX	A	853.9	2.5	221	10.4	60	8.22	0.715	28	0.217495	0.247206	0.0297111	0.000882752
12	PTX	A	853.9	2.5	221	10.4	60	8.22	0.715	35	0.327939	0.37859	0.0506517	0.00256559
12	PTX	A	853.9	2.5	221	10.4	60	8.22	0.715	42	0.398631	0.300791	0.0978398	0.00957263
12	PTX	A	853.9	2.5	221	10.4	60	8.22	0.715	42	0.302704	0.300791	0.00191257	3.65791e-06
12	PTX	A	853.9	2.5	221	10.4	60	8.22	0.715	49	0.408021	0.353975	0.0540465	0.00292102
12	PTX	A	853.9	2.5	221	10.4	60	8.22	0.715	63	0.445373	0.430082	0.0152902	0.000233791
18	PTX	A	853.9	2.5	221	10.4	61	9.4	0.533	0	0.00361661	-0.00479467	0.00841128	7.07496e-05
18	PTX	A	853.9	2.5	221	10.4	61	9.4	0.533	0	-0.00433297	-0.00479467	0.000461699	2.13166e-07
18	PTX	A	853.9	2.5	221	10.4	61	9.4	0.533	0	-0.00024376	-0.00479467	0.00455091	2.07107e-05
18	PTX	A	853.9	2.5	221	10.4	61	9.4	0.533	0	0.00743718	-0.00479467	0.0122318	0.000149618
18	PTX	A	853.9	2.5	221	10.4	61	9.4	0.533	1	-0.00556669	0.00922915	0.0147958	0.000218917
18	PTX	A	853.9	2.5	221	10.4	61	9.4	0.533	3	0.0186203	0.0248065	0.00618614	3.82683e-05
18	PTX	A	853.9	2.5	221	10.4	61	9.4	0.533	6	0.0418323	0.0485226	0.00669029	4.476e-05
18	PTX	A	853.9	2.5	221	10.4	61	9.4	0.533	9	0.0944447	0.0837254	0.0107193	0.000114904
18	PTX	A	853.9	2.5	221	10.4	61	9.4	0.533	12	0.0830029	0.128546	0.045543	0.00207416
18	PTX	A	853.9	2.5	221	10.4	61	9.4	0.533	28	0.317759	0.298858	0.0189007	0.000357237
18	PTX	A	853.9	2.5	221	10.4	61	9.4	0.533	35	0.476233	0.569046	0.0928122	0.00861411
17	PTX	A	853.9	2.5	221	10.4	64.5	10.46	0.526	0	0.0285508	-0.000172471	0.0287233	0.000825027
17	PTX	A	853.9	2.5	221	10.4	64.5	10.46	0.526	0	-0.0282123	-0.000172471	0.0280398	0.000786232
17	PTX	A	853.9	2.5	221	10.4	64.5	10.46	0.526	0.0833333	-0.00520239	0.000515345	0.00571774	3.26925e-05
17	PTX	A	853.9	2.5	221	10.4	64.5	10.46	0.526	3	0.036782	0.0358044	0.000977599	9.55699e-07
17	PTX	A	853.9	2.5	221	10.4	64.5	10.46	0.526	6	0.11088	0.0964792	0.0144013	0.000207398
17	PTX	A	853.9	2.5	221	10.4	64.5	10.46	0.526	15	0.424245	0.276924	0.147321	0.0217035
17	PTX	A	853.9	2.5	221	10.4	64.5	10.46	0.526	15	0.307119	0.276924	0.0301958	0.000911789
17	PTX	A	853.9	2.5	221	10.4	64.5	10.46	0.526	18	0.448172	0.304397	0.143775	0.0206712
17	PTX	A	853.9	2.5	221	10.4	64.5	10.46	0.526	21	0.430863	0.368221	0.0626425	0.00392408
17	PTX	A	853.9	2.5	221	10.4	64.5	10.46	0.526	28	0.511625	0.567075	0.0554498	0.00307468
17	PTX	A	853.9	2.5	221	10.4	64.5	10.46	0.526	35	0.614898	0.565887	0.0490112	0.0024021
13	PTX	A	853.9	2.5	221	10.4	43	19.8	1.41296	3	0.433388	0.356165	0.0772232	0.00596342
13	PTX	A	853.9	2.5	221	10.4	43	19.8	1.41296	4	0.728521	0.506766	0.221755	0.0491754
13	PTX	A	853.9	2.5	221	10.4	43	19.8	1.41296	5	0.586428	0.680453	0.0940249	0.00884069
13	PTX	A	853.9	2.5	221	10.4	43	19.8	1.41296	6	0.964994	0.865733	0.0992609	0.00985273
13	PTX	A	853.9	2.5	221	10.4	43	19.8	1.41296	6	0.840376	0.865733	0.025357	0.000642976
13	PTX	A	853.9	2.5	221	10.4	43	19.8	1.41296	6	0.831592	0.865733	0.0341414	0.00116563
13	PTX	A	853.9	2.5	221	10.4	43	19.8	1.41296	6	0.771418	0.865733	0.0943154	0.00889539
14	PTX	A	853.9	2.5	221	10.4	52	19.3	0.739	3	0.061768	0.0810796	0.0193115	0.000372936
14	PTX	A	853.9	2.5	221	10.4	52	19.3	0.739	6	0.154926	0.219109	0.0641835	0.00411952
14	PTX	A	853.9	2.5	221	10.4	52	19.3	0.739	6	0.103307	0.219109	0.115802	0.0134102
15	PTX	A	853.9	2.5	221	10.4	52	19.9	0.737	0	-0.0255931	-0.000784519	0.0248085	0.000615464
15	PTX	A	853.9	2.5	221	10.4	52	19.9	0.737	0	0.0116672	-0.000784519	0.0124517	0.000155046
15	PTX	A	853.9	2.5	221	10.4	52	19.9	0.737	0	-0.0155485	-0.000784519	0.014764	0.000217975
15	PTX	A	853.9	2.5	221	10.4	52	19.9	0.737	15	0.393931	0.680271	0.28634	0.0819904
16	PTX	A	853.9	2.5	221	10.4	61	18.4	0.499	0	0.0158215	-0.000924417	0.0167459	0.000280424
16	PTX	A	853.9	2.5	221	10.4	61	18.4	0.499	0.166667	-0.0195063	-0.00111761	0.0183887	0.000338144
16	PTX	A	853.9	2.5	221	10.4	61	18.4	0.499	1	-0.0424993	-0.00122502	0.0412743	0.00170357
16	PTX	A	853.9	2.5	221	10.4	61	18.4	0.499	1	-0.0458827	-0.00122502	0.0446577	0.00199431
16	PTX	A	853.9	2.5	221	10.4	61	18.4	0.499	3	0.0166648	0.00655817	0.0101066	0.000102144
16	PTX	A	853.9	2.5	221	10.4	61	18.4	0.499	18	0.195122	0.189625	0.00549756	3.02231e-05
16	PTX	A	853.9	2.5	221	10.4	61	18.4	0.499	28	0.359416	0.306317	0.053099	0.0028195
16	PTX	A	853.9	2.5	221	10.4	61	18.4	0.499	28	0.296706	0.306317	0.00961114	9.23739e-05
16	PTX	A	853.9	2.5	221	10.4	61	18.4	0.499	35	0.507352	0.333733	0.173619	0.0301434
16	PTX	A	853.9	2.5	221	10.4	61	18.4	0.499	35	0.468234	0.333733	0.134501	0.0180905
16	PTX	A	853.9	2.5	221	10.4	61	18.4	0.499	35	0.392326	0.333733	0.0585926	0.00343309
19	PTX	A	853.9	2.5	221	10.4	61	27.7	0.876	6	-0.00249065	0.013759	0.0162496	0.00026405
19	PTX	A	853.9	2.5	221	10.4	61	27.7	0.876	18	0.190085	0.180426	0.00965864	9.32893e-05
19	PTX	A	853.9	2.5	221	10.4	61	27.7	0.876	18	0.138866	0.180426	0.0415602	0.00172725
19	PTX	A	853.9	2.5	221	10.4	61	27.7	0.876	28	0.263775	0.371282	0.107508	0.0115579
19	PTX	A	853.9	2.5	221	10.4	61	27.7	0.876	28	0.240506	0.371282	0.130776	0.0171023
19	PTX	A	853.9	2.5	221	10.4	61	27.7	0.876	35	0.36376	0.647208	0.283448	0.0803425
20	RESI	B	314.4	1.3	86.2	14.63	31	9.49	1.215	0	-0.0568422	0.0350705	0.0919126	0.00844793
20	RESI	B	314.4	1.3	86.2	14.63	31	9.49	1.215	1	0.160289	0.165925	0.00563607	3.17653e-05
20	RESI	B	314.4	1.3	86.2	14.63	31	9.49	1.215	3	0.409595	0.45476	0.0451646	0.00203984
20	RESI	B	314.4	1.3	86.2	14.63	31	9.49	1.215	7	0.983334	0.873615	0.109719	0.0120382
20	RESI	B	314.4	1.3	86.2	14.63	31	9.49	1.215	14	0.970188	0.99609	0.0259015	0.000670887
21	RESI	B	314.4	1.3	86.2	14.63	43.5	8.05	2.57	0	-0.0663546	0.0533901	0.119745	0.0143388
21	RESI	B	314.4	1.3	86.2	14.63	43.5	8.05	2.57	0	-0.117566	0.0533901	0.170956	0.029226
21	RESI	B	314.4	1.3	86.2	14.63	43.5	8.05	2.57	3	0.191355	0.262539	0.071184	0.00506716
21	RESI	B	314.4	1.3	86.2	14.63	43.5	8.05	2.57	7	0.381002	0.34498	0.0360218	0.00129757
21	RESI	B	314.4	1.3	86.2	14.63	43.5	8.05	2.57	7	0.414703	0.34498	0.0697222	0.00486119
22	RESI	B	314.4	1.3	86.2	14.63	49	8.4	1.80507	0	-0.0305699	0.0448623	0.0754322	0.00569002
22	RESI	B	314.4	1.3	86.2	14.63	49	8.4	1.80507	0.166667	0.146943	0.0562961	0.0906469	0.00821686
22	RESI	B	314.4	1.3	86.2	14.63	49	8.4	1.80507	14	0.316373	0.444644	0.128271	0.0164535
22	RESI	B	314.4	1.3	86.2	14.63	49	8.4	1.80507	21	0.584041	0.6829	0.0988586	0.00977302
22	RESI	B	314.4	1.3	86.2	14.63	49	8.4	1.80507	21	0.740415	0.6829	0.0575145	0.00330792
22	RESI	B	314.4	1.3	86.2	14.63	49	8.4	1.80507	21	0.790155	0.6829	0.107255	0.0115037
24	RESI	A	314.4	1.3	86.2	14.63	59	8.38	0.375	0	0.0757361	-0.0131809	0.088917	0.00790623
24	RESI	A	314.4	1.3	86.2	14.63	59	8.38	0.375	0	0.0133837	-0.0131809	0.0265646	0.000705677
24	RESI	A	314.4	1.3	86.2	14.63	59	8.38	0.375	1	-0.0489687	0.0248234	0.0737921	0.00544527
24	RESI	A	314.4	1.3	86.2	14.63	59	8.38	0.375	21	0.209573	0.0949936	0.11458	0.0131285
24	RESI	A	314.4	1.3	86.2	14.63	59	8.38	0.375	28	0.23823	0.000111462	0.238119	0.0567005
24	RESI	A	314.4	1.3	86.2	14.63	59	8.38	0.375	35	0.180916	0.21832	0.0374032	0.001399
24	RESI	A	314.4	1.3	86.2	14.63	59	8.38	0.375	63	0.11573	0.271921	0.156192	0.0243958
23	RESI	B	314.4	1.3	86.2	14.63	60	8.88	0.901	0	-0.0892451	0.0473362	0.136581	0.0186544
23	RESI	B	314.4	1.3	86.2	14.63	60	8.88	0.901	0	-0.0233314	0.0473362	0.0706676	0.00499391
23	RESI	B	314.4	1.3	86.2	14.63	60	8.88	0.901	0.166667	0.129389	0.0516805	0.0777085	0.00603862
23	RESI	B	314.4	1.3	86.2	14.63	60	8.88	0.901	0.166667	0.107408	0.0516805	0.0557279	0.0031056
23	RESI	B	314.4	1.3	86.2	14.63	60	8.88	0.901	3	0.0996902	0.0951108	0.00457942	2.0971e-05
23	RESI	B	314.4	1.3	86.2	14.63	60	8.88	0.901	3	0.0990866	0.0951108	0.00397579	1.58069e-05
23	RESI	B	314.4	1.3	86.2	14.63	60	8.88	0.901	7	0.183594	0.144606	0.0389881	0.00152008
23	RESI	B	314.4	1.3	86.2	14.63	60	8.88	0.901	14	0.231281	0.182925	0.0483557	0.00233827
23	RESI	B	314.4	1.3	86.2	14.63	60	8.88	0.901	21	0.0728288	0.121416	0.0485871	0.00236071
23	RESI	B	314.4	1.3	86.2	14.63	60	8.88	0.901	56	0.221173	0.236617	0.0154442	0.000238524
23	RESI	B	314.4	1.3	86.2	14.63	60	8.88	0.901	56	0.164736	0.236617	0.071881	0.00516688
23	RESI	B	314.4	1.3	86.2	14.63	60	8.88	0.901	70	0.274936	0.232696	0.0422401	0.00178423
25	RBC	B	434.5	2.2	91.2	5.5	45.5	10.1	4.828	0	0.0167823	0.11541	0.0986274	0.00972735
25	RBC	B	434.5	2.2	91.2	5.5	45.5	10.1	4.828	0.25	0.184488	0.211449	0.0269609	0.000726891
25	RBC	B	434.5	2.2	91.2	5.5	45.5	10.1	4.828	0.5	0.343797	0.307717	0.0360807	0.00130181
25	RBC	B	434.5	2.2	91.2	5.5	45.5	10.1	4.828	1	0.783497	0.497514	0.285984	0.0817866
25	RBC	B	434.5	2.2	91.2	5.5	45.5	10.1	4.828	1.5	0.89812	0.677969	0.22015	0.0484662
25	RBC	B	434.5	2.2	91.2	5.5	45.5	10.1	4.828	2.5	0.974868	0.990275	0.0154075	0.000237391
25	RBC	B	434.5	2.2	91.2	5.5	45.5	10.1	4.828	2.5	0.96007	0.990275	0.0302051	0.000912347
25	RBC	B	434.5	2.2	91.2	5.5	45.5	10.1	4.828	2.5	0.983617	0.990275	0.00665813	4.43307e-05
26	RBC	B	434.5	2.2	91.2	5.5	51.6	7.82	2.186	0	0.04628	0.000382041	0.045898	0.00210662
26	RBC	B	434.5	2.2	91.2	5.5	51.6	7.82	2.186	0	-0.0538518	0.000382041	0.0542339	0.00294131
26	RBC	B	434.5	2.2	91.2	5.5	51.6	7.82	2.186	0	0.0548672	0.000382041	0.0544852	0.00296863
26	RBC	B	434.5	2.2	91.2	5.5	51.6	7.82	2.186	1	0.103098	0.117906	0.0148081	0.000219281
26	RBC	B	434.5	2.2	91.2	5.5	51.6	7.82	2.186	10	0.905472	0.876587	0.0288851	0.000834352
26	RBC	B	434.5	2.2	91.2	5.5	51.6	7.82	2.186	14	0.90627	0.913649	0.00737946	5.44565e-05
27	RBC	B	434.5	2.2	91.2	5.5	66.3	7.79	5.463	21	0.0672077	0.116946	0.0497379	0.00247386
27	RBC	B	434.5	2.2	91.2	5.5	66.3	7.79	5.463	28	0.121306	0.135315	0.0140094	0.000196263
27	RBC	B	434.5	2.2	91.2	5.5	66.3	7.79	5.463	56	0.875946	0.877806	0.00185978	3.45876e-06
27	RBC	B	434.5	2.2	91.2	5.5	66.3	7.79	5.463	63	0.841073	0.912579	0.0715062	0.00511314
28	RBC	B	434.5	2.2	91.2	5.5	51.6	19.5	2.099	0	-0.044	0.0279734	0.0719734	0.00518017
28	RBC	B	434.5	2.2	91.2	5.5	51.6	19.5	2.099	3	0.043	0.164606	0.121606	0.0147881
28	RBC	B	434.5	2.2	91.2	5.5	51.6	19.5	2.099	7	0.532698	0.378835	0.153863	0.0236739
28	RBC	B	434.5	2.2	91.2	5.5	51.6	19.5	2.099	21	0.934757	0.881454	0.053303	0.00284121
29	SFN	A	464.8	4.1	92.4	7.2	45.5	5.2	1.87062	0.25	-0.0758621	-0.0213392	0.0545228	0.00297274
29	SFN	A	464.8	4.1	92.4	7.2	45.5	5.2	1.87062	5	0.77004	0.566365	0.203675	0.0414833
30	TRM	A	615.4	3.4	102	12.6	45.5	4.5	0.917	0	-0.0163976	0.00395678	0.0203544	0.000414301
30	TRM	A	615.4	3.4	102	12.6	45.5	4.5	0.917	0.125	0.0137282	0.0354268	0.0216985	0.000470826
30	TRM	A	615.4	3.4	102	12.6	45.5	4.5	0.917	0.25	0.207067	0.066849	0.140219	0.0196612
30	TRM	A	615.4	3.4	102	12.6	45.5	4.5	0.917	3	0.329478	0.629925	0.300448	0.0902688

## Sheet: File S4 (Performance)
All Data-Performance	Scaffold Specific Parameters				In Vitro	GPR PREDICTIONS					SHAPLEY VALUES
Observation #	%CAC	%Load (wt.)	Fd (µm)	Time (Days)	Observed F(t)	Predicted F(t)	±Stdev	RE	AE	SE	%CAC	%Load	Fd	Time
1	47	3.81	0.63	0	-0.035196	0.0846546	0.0965144	-0.119851	0.119851	0.0143641	0.0491807	0.0849297	-0.0069346	-0.34531
2	47	3.81	0.63	0	-0.00392502	0.0846546	0.0965144	-0.0885796	0.0885796	0.00784634	0.0491807	0.0849297	-0.0069346	-0.34531
3	47	3.81	0.63	0	-0.0942124	0.0846546	0.0965144	-0.178867	0.178867	0.0319934	0.0491807	0.0849297	-0.0069346	-0.34531
4	47	3.81	0.63	0	0.0303778	0.0846546	0.0965144	-0.0542768	0.0542768	0.00294597	0.0491807	0.0849297	-0.0069346	-0.34531
5	47	3.81	0.63	0	0.0446207	0.0846546	0.0965144	-0.0400338	0.0400338	0.00160271	0.0491807	0.0849297	-0.0069346	-0.34531
6	47	3.81	0.63	0	0.0583348	0.0846546	0.0965144	-0.0263198	0.0263198	0.00069273	0.0491807	0.0849297	-0.0069346	-0.34531
7	47	3.81	0.63	1	0.567589	0.38142	0.0948223	0.186169	0.186169	0.034659	0.106034	0.143105	0.0145204	-0.185027
8	47	3.81	0.63	1	0.804395	0.38142	0.0948223	0.422975	0.422975	0.178908	0.106034	0.143105	0.0145204	-0.185027
9	47	3.81	0.63	1	0.658476	0.38142	0.0948223	0.277056	0.277056	0.0767599	0.106034	0.143105	0.0145204	-0.185027
10	47	3.81	0.63	2	0.660662	0.629452	0.0950476	0.0312099	0.0312099	0.000974056	0.154839	0.187604	0.0297088	-0.0454887
11	47	3.81	0.63	2	0.84871	0.629452	0.0950476	0.219259	0.219259	0.0480743	0.154839	0.187604	0.0297088	-0.0454887
12	47	3.81	0.63	2	0.702579	0.629452	0.0950476	0.0731277	0.0731277	0.00534766	0.154839	0.187604	0.0297088	-0.0454887
13	47	3.81	0.63	3	0.763676	0.798717	0.0955018	-0.0350413	0.0350413	0.00122789	0.1887	0.210816	0.0359309	0.0604815
14	47	3.81	0.63	3	0.830025	0.798717	0.0955018	0.0313081	0.0313081	0.000980198	0.1887	0.210816	0.0359309	0.0604815
15	47	3.81	0.63	3	0.740514	0.798717	0.0955018	-0.0582036	0.0582036	0.00338766	0.1887	0.210816	0.0359309	0.0604815
16	47	3.81	0.63	5	0.854527	0.904673	0.0996394	-0.0501456	0.0501456	0.00251458	0.209812	0.195138	0.0265445	0.17039
17	47	3.81	0.63	5	0.922675	0.904673	0.0996394	0.0180018	0.0180018	0.000324064	0.209812	0.195138	0.0265445	0.17039
18	47	3.81	0.63	5	0.862706	0.904673	0.0996394	-0.0419665	0.0419665	0.00176119	0.209812	0.195138	0.0265445	0.17039
19	50	4.32	0.548	0	-0.116866	0.0262532	0.0952237	-0.14312	0.14312	0.0204832	0.00892806	0.0490307	-0.0144897	-0.320004
20	50	4.32	0.548	0	-0.0283306	0.0262532	0.0952237	-0.0545839	0.0545839	0.0029794	0.00892806	0.0490307	-0.0144897	-0.320004
21	50	4.32	0.548	0	0.0016496	0.0262532	0.0952237	-0.0246036	0.0246036	0.000605339	0.00892806	0.0490307	-0.0144897	-0.320004
22	50	4.32	0.548	0	-0.00709861	0.0262532	0.0952237	-0.0333519	0.0333519	0.00111235	0.00892806	0.0490307	-0.0144897	-0.320004
23	50	4.32	0.548	0	0.00937613	0.0262532	0.0952237	-0.0168771	0.0168771	0.000284837	0.00892806	0.0490307	-0.0144897	-0.320004
24	50	4.32	0.548	0	0.14127	0.0262532	0.0952237	0.115017	0.115017	0.0132288	0.00892806	0.0490307	-0.0144897	-0.320004
25	50	4.32	0.548	1	0.350269	0.192151	0.0949629	0.158118	0.158118	0.0250015	0.0182163	0.0904502	-0.008352	-0.210952
26	50	4.32	0.548	1	0.337051	0.192151	0.0949629	0.1449	0.1449	0.0209961	0.0182163	0.0904502	-0.008352	-0.210952
27	50	4.32	0.548	1	0.30391	0.192151	0.0949629	0.111759	0.111759	0.0124901	0.0182163	0.0904502	-0.008352	-0.210952
28	50	4.32	0.548	3	0.437209	0.418769	0.0972671	0.0184399	0.0184399	0.000340028	0.0271319	0.144236	-0.0106475	-0.0447397
29	50	4.32	0.548	3	0.426992	0.418769	0.0972671	0.00822297	0.00822297	6.76172e-05	0.0271319	0.144236	-0.0106475	-0.0447397
30	50	4.32	0.548	3	0.459207	0.418769	0.0972671	0.0404381	0.0404381	0.00163524	0.0271319	0.144236	-0.0106475	-0.0447397
31	50	4.32	0.548	7	0.404994	0.584751	0.0995046	-0.179757	0.179757	0.0323127	0.0503049	0.158797	-0.0365208	0.109381
32	50	4.32	0.548	7	0.619037	0.584751	0.0995046	0.0342866	0.0342866	0.00117557	0.0503049	0.158797	-0.0365208	0.109381
33	50	4.32	0.548	7	0.421468	0.584751	0.0995046	-0.163283	0.163283	0.0266612	0.0503049	0.158797	-0.0365208	0.109381
34	50	4.32	0.548	14	0.819225	0.801336	0.108743	0.0178886	0.0178886	0.000320003	0.0872148	0.182062	-0.0298016	0.259072
35	50	4.32	0.548	14	0.957344	0.801336	0.108743	0.156008	0.156008	0.0243386	0.0872148	0.182062	-0.0298016	0.259072
36	50	4.32	0.548	14	0.643718	0.801336	0.108743	-0.157618	0.157618	0.0248436	0.0872148	0.182062	-0.0298016	0.259072
37	50	4.32	0.548	21	1.0257	0.880373	0.110477	0.145329	0.145329	0.0211205	0.105968	0.169787	-0.0124474	0.314276
38	50	4.32	0.548	21	0.91852	0.880373	0.110477	0.0381472	0.0381472	0.00145521	0.105968	0.169787	-0.0124474	0.314276
39	50	4.32	0.548	21	0.86833	0.880373	0.110477	-0.0120433	0.0120433	0.000145042	0.105968	0.169787	-0.0124474	0.314276
40	59	3.93	0.428	0	-0.139252	0.066175	0.0963036	-0.205427	0.205427	0.0422003	-0.0622978	0.0879319	-0.0107919	-0.251456
41	59	3.93	0.428	0	-0.0379375	0.066175	0.0963036	-0.104112	0.104112	0.0108394	-0.0622978	0.0879319	-0.0107919	-0.251456
42	59	3.93	0.428	0	-0.114599	0.066175	0.0963036	-0.180774	0.180774	0.0326792	-0.0622978	0.0879319	-0.0107919	-0.251456
43	59	3.93	0.428	0	0.130772	0.066175	0.0963036	0.0645972	0.0645972	0.0041728	-0.0622978	0.0879319	-0.0107919	-0.251456
44	59	3.93	0.428	0	0.0637534	0.066175	0.0963036	-0.00242162	0.00242162	5.86426e-06	-0.0622978	0.0879319	-0.0107919	-0.251456
45	59	3.93	0.428	0	0.0972628	0.066175	0.0963036	0.0310878	0.0310878	0.000966452	-0.0622978	0.0879319	-0.0107919	-0.251456
46	59	3.93	0.428	1	0.301397	0.195462	0.0960184	0.105935	0.105935	0.0112222	-0.0700614	0.122443	7.29e-05	-0.159781
47	59	3.93	0.428	1	0.391052	0.195462	0.0960184	0.19559	0.19559	0.0382553	-0.0700614	0.122443	7.29e-05	-0.159781
48	59	3.93	0.428	1	0.411328	0.195462	0.0960184	0.215866	0.215866	0.0465982	-0.0700614	0.122443	7.29e-05	-0.159781
49	59	3.93	0.428	3	0.382879	0.360019	0.102302	0.0228605	0.0228605	0.000522603	-0.0905488	0.166049	0.00670331	-0.0249734
50	59	3.93	0.428	3	0.363081	0.360019	0.102302	0.00306259	0.00306259	9.37944e-06	-0.0905488	0.166049	0.00670331	-0.0249734
51	59	3.93	0.428	3	0.48057	0.360019	0.102302	0.120551	0.120551	0.0145325	-0.0905488	0.166049	0.00670331	-0.0249734
52	59	3.93	0.428	7	0.381272	0.387269	0.100294	-0.00599676	0.00599676	3.59611e-05	-0.124678	0.164836	-0.0198164	0.0641395
53	59	3.93	0.428	7	0.413448	0.387269	0.100294	0.0261791	0.0261791	0.000685347	-0.124678	0.164836	-0.0198164	0.0641395
54	59	3.93	0.428	7	0.429109	0.387269	0.100294	0.0418397	0.0418397	0.00175056	-0.124678	0.164836	-0.0198164	0.0641395
55	59	3.93	0.428	14	0.576653	0.536767	0.104252	0.0398856	0.0398856	0.00159086	-0.104864	0.184962	-0.0254078	0.179289
56	59	3.93	0.428	14	0.537638	0.536767	0.104252	0.000871099	0.000871099	7.58813e-07	-0.104864	0.184962	-0.0254078	0.179289
57	59	3.93	0.428	14	0.554051	0.536767	0.104252	0.0172839	0.0172839	0.000298733	-0.104864	0.184962	-0.0254078	0.179289
58	59	3.93	0.428	21	0.620591	0.53144	0.104376	0.0891514	0.0891514	0.00794798	-0.112357	0.172223	-0.0254086	0.194193
59	59	3.93	0.428	21	0.505155	0.53144	0.104376	-0.0262851	0.0262851	0.000690907	-0.112357	0.172223	-0.0254086	0.194193
60	59	3.93	0.428	21	0.453728	0.53144	0.104376	-0.0777118	0.0777118	0.00603913	-0.112357	0.172223	-0.0254086	0.194193
61	59	3.93	0.428	28	0.775316	0.70212	0.108143	0.0731958	0.0731958	0.00535763	-0.0624033	0.210151	-0.002072	0.253655
62	59	3.93	0.428	28	0.681934	0.70212	0.108143	-0.0201861	0.0201861	0.000407478	-0.0624033	0.210151	-0.002072	0.253655
63	59	3.93	0.428	28	0.616112	0.70212	0.108143	-0.0860082	0.0860082	0.00739741	-0.0624033	0.210151	-0.002072	0.253655
64	59	3.93	0.428	35	0.348755	0.700792	0.101024	-0.352037	0.352037	0.12393	-0.0270211	0.146963	0.015206	0.262856
65	59	3.93	0.428	35	0.623703	0.700792	0.101024	-0.0770888	0.0770888	0.00594268	-0.0270211	0.146963	0.015206	0.262856
66	59	3.93	0.428	35	0.764613	0.700792	0.101024	0.0638218	0.0638218	0.00407322	-0.0270211	0.146963	0.015206	0.262856
67	47	9.52	1.042	0	-0.0549653	-0.00298066	0.0992848	-0.0519846	0.0519846	0.0027024	0.0489753	-0.0281407	-0.0144189	-0.312185
68	47	9.52	1.042	0	0.0106254	-0.00298066	0.0992848	0.013606	0.013606	0.000185124	0.0489753	-0.0281407	-0.0144189	-0.312185
69	47	9.52	1.042	0	-0.0107129	-0.00298066	0.0992848	-0.00773225	0.00773225	5.97878e-05	0.0489753	-0.0281407	-0.0144189	-0.312185
70	47	9.52	1.042	0	0.0265142	-0.00298066	0.0992848	0.0294949	0.0294949	0.000869947	0.0489753	-0.0281407	-0.0144189	-0.312185
71	47	9.52	1.042	0	0.00136784	-0.00298066	0.0992848	0.0043485	0.0043485	1.89095e-05	0.0489753	-0.0281407	-0.0144189	-0.312185
72	47	9.52	1.042	0	0.0271708	-0.00298066	0.0992848	0.0301514	0.0301514	0.000909108	0.0489753	-0.0281407	-0.0144189	-0.312185
73	47	9.52	1.042	1	0.16065	0.0802813	0.0972191	0.0803687	0.0803687	0.00645912	0.0704294	-0.0428576	-0.0197094	-0.23037
74	47	9.52	1.042	1	0.18514	0.0802813	0.0972191	0.104858	0.104858	0.0109953	0.0704294	-0.0428576	-0.0197094	-0.23037
75	47	9.52	1.042	1	0.146534	0.0802813	0.0972191	0.0662526	0.0662526	0.0043894	0.0704294	-0.0428576	-0.0197094	-0.23037
76	47	9.52	1.042	2	0.204114	0.164067	0.0984032	0.0400472	0.0400472	0.00160378	0.0920258	-0.0558886	-0.0235738	-0.151285
77	47	9.52	1.042	2	0.192625	0.164067	0.0984032	0.0285574	0.0285574	0.000815525	0.0920258	-0.0558886	-0.0235738	-0.151285
78	47	9.52	1.042	2	0.144302	0.164067	0.0984032	-0.0197656	0.0197656	0.00039068	0.0920258	-0.0558886	-0.0235738	-0.151285
79	47	9.52	1.042	3	0.183498	0.255246	0.0994737	-0.0717479	0.0717479	0.00514776	0.114783	-0.0636376	-0.0235798	-0.0751077
80	47	9.52	1.042	3	0.165968	0.255246	0.0994737	-0.0892781	0.0892781	0.00797059	0.114783	-0.0636376	-0.0235798	-0.0751077
81	47	9.52	1.042	3	0.161438	0.255246	0.0994737	-0.0938084	0.0938084	0.00880002	0.114783	-0.0636376	-0.0235798	-0.0751077
82	47	9.52	1.042	5	0.535876	0.48969	0.0991451	0.0461859	0.0461859	0.00213313	0.169769	-0.0535051	-0.0046041	0.075241
83	47	9.52	1.042	5	0.56529	0.48969	0.0991451	0.0755999	0.0755999	0.00571534	0.169769	-0.0535051	-0.0046041	0.075241
84	47	9.52	1.042	5	0.16111	0.48969	0.0991451	-0.32858	0.32858	0.107965	0.169769	-0.0535051	-0.0046041	0.075241
85	47	9.52	1.042	7	0.942419	0.755535	0.105303	0.186884	0.186884	0.0349258	0.229037	-0.0201748	0.0314057	0.212478
86	47	9.52	1.042	7	0.800077	0.755535	0.105303	0.0445416	0.0445416	0.00198395	0.229037	-0.0201748	0.0314057	0.212478
87	47	9.52	1.042	7	0.693582	0.755535	0.105303	-0.0619529	0.0619529	0.00383817	0.229037	-0.0201748	0.0314057	0.212478
88	50	10.51	0.664	0	0.0482122	0.0142228	0.101021	0.0339894	0.0339894	0.00115528	-0.0049882	-0.0408616	-0.0281389	-0.214577
89	50	10.51	0.664	0	0.00220088	0.0142228	0.101021	-0.0120219	0.0120219	0.000144526	-0.0049882	-0.0408616	-0.0281389	-0.214577
90	50	10.51	0.664	0	0.00830019	0.0142228	0.101021	-0.00592259	0.00592259	3.50771e-05	-0.0049882	-0.0408616	-0.0281389	-0.214577
91	50	10.51	0.664	0	-0.00970165	0.0142228	0.101021	-0.0239244	0.0239244	0.000572378	-0.0049882	-0.0408616	-0.0281389	-0.214577
92	50	10.51	0.664	0	-0.0252164	0.0142228	0.101021	-0.0394392	0.0394392	0.00155545	-0.0049882	-0.0408616	-0.0281389	-0.214577
93	50	10.51	0.664	0	-0.0237952	0.0142228	0.101021	-0.038018	0.038018	0.00144537	-0.0049882	-0.0408616	-0.0281389	-0.214577
94	50	10.51	0.664	1	0.112865	0.0338658	0.0978213	0.0789988	0.0789988	0.00624081	-0.012247	-0.0588428	-0.0347248	-0.163108
95	50	10.51	0.664	1	0.0161381	0.0338658	0.0978213	-0.0177277	0.0177277	0.000314272	-0.012247	-0.0588428	-0.0347248	-0.163108
96	50	10.51	0.664	1	0.0718778	0.0338658	0.0978213	0.038012	0.038012	0.00144491	-0.012247	-0.0588428	-0.0347248	-0.163108
97	50	10.51	0.664	3	0.109652	0.0629572	0.100897	0.046695	0.046695	0.00218042	-0.027985	-0.0883241	-0.0485998	-0.0749224
98	50	10.51	0.664	3	0.0386838	0.0629572	0.100897	-0.0242734	0.0242734	0.0005892	-0.027985	-0.0883241	-0.0485998	-0.0749224
99	50	10.51	0.664	3	0.0437997	0.0629572	0.100897	-0.0191575	0.0191575	0.000367011	-0.027985	-0.0883241	-0.0485998	-0.0749224
100	50	10.51	0.664	7	0.161228	0.127082	0.108124	0.034146	0.034146	0.00116595	-0.0474241	-0.115348	-0.0632374	0.0503022
101	50	10.51	0.664	7	0.0725916	0.127082	0.108124	-0.0544902	0.0544902	0.00296918	-0.0474241	-0.115348	-0.0632374	0.0503022
102	50	10.51	0.664	7	0.10525	0.127082	0.108124	-0.0218316	0.0218316	0.000476619	-0.0474241	-0.115348	-0.0632374	0.0503022
103	50	10.51	0.664	14	0.244213	0.166198	0.123426	0.078015	0.078015	0.00608634	-0.0466306	-0.160138	-0.0665835	0.136761
104	50	10.51	0.664	14	0.147427	0.166198	0.123426	-0.018771	0.018771	0.00035235	-0.0466306	-0.160138	-0.0665835	0.136761
105	50	10.51	0.664	14	0.260036	0.166198	0.123426	0.0938386	0.0938386	0.00880569	-0.0466306	-0.160138	-0.0665835	0.136761
106	50	10.51	0.664	21	0.410123	0.344517	0.110383	0.0656061	0.0656061	0.00430417	0.020383	-0.145801	-0.04927	0.216417
107	50	10.51	0.664	21	0.354502	0.344517	0.110383	0.00998544	0.00998544	9.9709e-05	0.020383	-0.145801	-0.04927	0.216417
108	50	10.51	0.664	21	0.357358	0.344517	0.110383	0.0128408	0.0128408	0.000164887	0.020383	-0.145801	-0.04927	0.216417
109	50	10.51	0.664	38	0.648251	0.65901	0.110792	-0.0107594	0.0107594	0.000115764	0.0757958	-0.0568194	0.0179665	0.319279
110	50	10.51	0.664	38	0.72612	0.65901	0.110792	0.0671096	0.0671096	0.0045037	0.0757958	-0.0568194	0.0179665	0.319279
111	50	10.51	0.664	38	0.673355	0.65901	0.110792	0.0143443	0.0143443	0.00020576	0.0757958	-0.0568194	0.0179665	0.319279
112	50	10.51	0.664	49	0.665205	0.792292	0.111088	-0.127087	0.127087	0.0161511	0.135984	0.0349858	0.0455614	0.272973
113	50	10.51	0.664	49	0.804703	0.792292	0.111088	0.0124108	0.0124108	0.000154027	0.135984	0.0349858	0.0455614	0.272973
114	50	10.51	0.664	49	0.801074	0.792292	0.111088	0.00878203	0.00878203	7.7124e-05	0.135984	0.0349858	0.0455614	0.272973
115	47	4.2	0.63475	0	0.0412925	0.0187907	0.0957856	0.0225018	0.0225018	0.000506331	0.0399767	0.0466812	-0.0152379	-0.355418
116	47	4.2	0.63475	0	0.000164785	0.0187907	0.0957856	-0.0186259	0.0186259	0.000346923	0.0399767	0.0466812	-0.0152379	-0.355418
117	47	4.2	0.63475	0	9.61248e-05	0.0187907	0.0957856	-0.0186945	0.0186945	0.000349486	0.0399767	0.0466812	-0.0152379	-0.355418
118	47	4.2	0.63475	0	-0.0319684	0.0187907	0.0957856	-0.050759	0.050759	0.00257648	0.0399767	0.0466812	-0.0152379	-0.355418
119	47	4.2	0.63475	0	-0.00958502	0.0187907	0.0957856	-0.0283757	0.0283757	0.000805179	0.0399767	0.0466812	-0.0152379	-0.355418
120	47	4.2	0.63475	1	0.313875	0.309225	0.0951201	0.00465021	0.00465021	2.16245e-05	0.0964241	0.102368	0.00519147	-0.197548
121	47	4.2	0.63475	1	0.25057	0.309225	0.0951201	-0.0586548	0.0586548	0.00344039	0.0964241	0.102368	0.00519147	-0.197548
122	47	4.2	0.63475	2	0.599503	0.555215	0.0960317	0.0442881	0.0442881	0.00196144	0.145731	0.14585	0.0197825	-0.0589366
123	47	4.2	0.63475	2	0.39716	0.555215	0.0960317	-0.158055	0.158055	0.0249813	0.145731	0.14585	0.0197825	-0.0589366
124	47	4.2	0.63475	2	0.465477	0.555215	0.0960317	-0.0897373	0.0897373	0.00805279	0.145731	0.14585	0.0197825	-0.0589366
125	47	4.2	0.63475	3	0.716157	0.727035	0.0969592	-0.0108775	0.0108775	0.000118319	0.180951	0.169651	0.0259157	0.0477287
126	47	4.2	0.63475	3	0.815784	0.727035	0.0969592	0.088749	0.088749	0.00787639	0.180951	0.169651	0.0259157	0.0477287
127	47	4.2	0.63475	3	0.604652	0.727035	0.0969592	-0.122382	0.122382	0.0149774	0.180951	0.169651	0.0259157	0.0477287
128	47	4.2	0.63475	5	0.975282	0.844151	0.101418	0.131131	0.131131	0.0171954	0.205131	0.157626	0.0170609	0.161544
129	47	4.2	0.63475	5	0.908063	0.844151	0.101418	0.0639127	0.0639127	0.00408484	0.205131	0.157626	0.0170609	0.161544
130	47	4.2	0.63475	5	0.977479	0.844151	0.101418	0.133329	0.133329	0.0177765	0.205131	0.157626	0.0170609	0.161544
131	50	4.46	0.59495	0	-0.0530216	-0.00447436	0.0953419	-0.0485473	0.0485473	0.00235684	0.00450424	0.0343764	-0.0204862	-0.325657
132	50	4.46	0.59495	0	-0.0202512	-0.00447436	0.0953419	-0.0157769	0.0157769	0.00024891	0.00450424	0.0343764	-0.0204862	-0.325657
133	50	4.46	0.59495	0	0.0379001	-0.00447436	0.0953419	0.0423745	0.0423745	0.0017956	0.00450424	0.0343764	-0.0204862	-0.325657
134	50	4.46	0.59495	0	0.0659156	-0.00447436	0.0953419	0.0703899	0.0703899	0.00495474	0.00450424	0.0343764	-0.0204862	-0.325657
135	50	4.46	0.59495	0	-0.0593187	-0.00447436	0.0953419	-0.0548443	0.0548443	0.0030079	0.00450424	0.0343764	-0.0204862	-0.325657
136	50	4.46	0.59495	0	0.0287758	-0.00447436	0.0953419	0.0332502	0.0332502	0.00110557	0.00450424	0.0343764	-0.0204862	-0.325657
137	50	4.46	0.59495	1	0.255722	0.159282	0.0950171	0.0964401	0.0964401	0.0093007	0.013653	0.074235	-0.014052	-0.217343
138	50	4.46	0.59495	1	0.155735	0.159282	0.0950171	-0.00354621	0.00354621	1.25756e-05	0.013653	0.074235	-0.014052	-0.217343
139	50	4.46	0.59495	1	0.115947	0.159282	0.0950171	-0.0433341	0.0433341	0.00187784	0.013653	0.074235	-0.014052	-0.217343
140	50	4.46	0.59495	3	0.294347	0.386089	0.096861	-0.0917421	0.0917421	0.00841661	0.0226668	0.126234	-0.01482	-0.0507805
141	50	4.46	0.59495	3	0.300095	0.386089	0.096861	-0.0859935	0.0859935	0.00739489	0.0226668	0.126234	-0.01482	-0.0507805
142	50	4.46	0.59495	3	0.279943	0.386089	0.096861	-0.106146	0.106146	0.0112669	0.0226668	0.126234	-0.01482	-0.0507805
143	50	4.46	0.59495	5	0.495611	0.496489	0.0971344	-0.000877408	0.000877408	7.69844e-07	0.0315971	0.14127	-0.0264449	0.0472781
144	50	4.46	0.59495	5	0.509821	0.496489	0.0971344	0.0133325	0.0133325	0.000177757	0.0315971	0.14127	-0.0264449	0.0472781
145	50	4.46	0.59495	5	0.498001	0.496489	0.0971344	0.00151245	0.00151245	2.2875e-06	0.0315971	0.14127	-0.0264449	0.0472781
146	50	4.46	0.59495	7	0.524548	0.565501	0.0974081	-0.0409525	0.0409525	0.0016771	0.0479452	0.141572	-0.0359669	0.109162
147	50	4.46	0.59495	7	0.61885	0.565501	0.0974081	0.0533499	0.0533499	0.00284621	0.0479452	0.141572	-0.0359669	0.109162
148	50	4.46	0.59495	7	0.621434	0.565501	0.0974081	0.0559335	0.0559335	0.00312856	0.0479452	0.141572	-0.0359669	0.109162
149	50	4.46	0.59495	10	0.73957	0.686737	0.104512	0.0528333	0.0528333	0.00279136	0.076066	0.153568	-0.0347966	0.189111
150	50	4.46	0.59495	10	0.927206	0.686737	0.104512	0.240469	0.240469	0.0578255	0.076066	0.153568	-0.0347966	0.189111
151	50	4.46	0.59495	10	0.711151	0.686737	0.104512	0.0244134	0.0244134	0.000596015	0.076066	0.153568	-0.0347966	0.189111
152	59	4.42	0.44935	0	-0.0257763	-0.0121272	0.0963213	-0.0136491	0.0136491	0.000186298	-0.0710513	0.0417342	-0.0233825	-0.262216
153	59	4.42	0.44935	0	0.0285011	-0.0121272	0.0963213	0.0406282	0.0406282	0.00165065	-0.0710513	0.0417342	-0.0233825	-0.262216
154	59	4.42	0.44935	0	0.00920971	-0.0121272	0.0963213	0.0213369	0.0213369	0.000455263	-0.0710513	0.0417342	-0.0233825	-0.262216
155	59	4.42	0.44935	0	0.0303975	-0.0121272	0.0963213	0.0425247	0.0425247	0.00180835	-0.0710513	0.0417342	-0.0233825	-0.262216
156	59	4.42	0.44935	0	-0.0261687	-0.0121272	0.0963213	-0.0140415	0.0140415	0.000197163	-0.0710513	0.0417342	-0.0233825	-0.262216
157	59	4.42	0.44935	0	-0.0161633	-0.0121272	0.0963213	-0.00403614	0.00403614	1.62904e-05	-0.0710513	0.0417342	-0.0233825	-0.262216
158	59	4.42	0.44935	1	0.0468115	0.102116	0.0961071	-0.0553043	0.0553043	0.00305857	-0.0812203	0.0708626	-0.0145791	-0.175736
159	59	4.42	0.44935	1	0.0156184	0.102116	0.0961071	-0.0864974	0.0864974	0.00748181	-0.0812203	0.0708626	-0.0145791	-0.175736
160	59	4.42	0.44935	1	0.106778	0.102116	0.0961071	0.00466233	0.00466233	2.17373e-05	-0.0812203	0.0708626	-0.0145791	-0.175736
161	59	4.42	0.44935	3	0.226515	0.248797	0.10109	-0.0222814	0.0222814	0.000496462	-0.104762	0.108072	-0.0103542	-0.0469479
162	59	4.42	0.44935	3	0.103508	0.248797	0.10109	-0.145288	0.145288	0.0211087	-0.104762	0.108072	-0.0103542	-0.0469479
163	59	4.42	0.44935	3	0.179562	0.248797	0.10109	-0.0692346	0.0692346	0.00479343	-0.104762	0.108072	-0.0103542	-0.0469479
164	59	4.42	0.44935	7	0.23057	0.287929	0.0998209	-0.0573593	0.0573593	0.00329009	-0.138495	0.111281	-0.0351136	0.0474677
165	59	4.42	0.44935	7	0.242079	0.287929	0.0998209	-0.0458499	0.0458499	0.00210221	-0.138495	0.111281	-0.0351136	0.0474677
166	59	4.42	0.44935	7	0.268498	0.287929	0.0998209	-0.0194306	0.0194306	0.000377548	-0.138495	0.111281	-0.0351136	0.0474677
167	59	4.42	0.44935	14	0.503264	0.499572	0.103571	0.0036924	0.0036924	1.36338e-05	-0.111697	0.154309	-0.0321437	0.186315
168	59	4.42	0.44935	14	0.477303	0.499572	0.103571	-0.0222692	0.0222692	0.000495916	-0.111697	0.154309	-0.0321437	0.186315
169	59	4.42	0.44935	14	0.480965	0.499572	0.103571	-0.0186071	0.0186071	0.000346224	-0.111697	0.154309	-0.0321437	0.186315
170	59	4.42	0.44935	21	0.623132	0.552643	0.103637	0.0704896	0.0704896	0.00496878	-0.110581	0.16224	-0.0239447	0.22214
171	59	4.42	0.44935	21	0.589192	0.552643	0.103637	0.0365499	0.0365499	0.0013359	-0.110581	0.16224	-0.0239447	0.22214
172	59	4.42	0.44935	21	0.612473	0.552643	0.103637	0.0598303	0.0598303	0.00357967	-0.110581	0.16224	-0.0239447	0.22214
173	59	4.42	0.44935	28	0.76458	0.747976	0.101949	0.0166038	0.0166038	0.000275687	-0.0604346	0.21015	0.00311695	0.292355
174	59	4.42	0.44935	28	0.735087	0.747976	0.101949	-0.012889	0.012889	0.000166127	-0.0604346	0.21015	0.00311695	0.292355
175	59	4.42	0.44935	28	0.793615	0.747976	0.101949	0.0456389	0.0456389	0.00208291	-0.0604346	0.21015	0.00311695	0.292355
176	59	4.42	0.44935	35	0.967237	0.823467	0.100451	0.143771	0.143771	0.02067	-0.0123533	0.174221	0.0305318	0.328279
177	59	4.42	0.44935	35	1	0.823467	0.100451	0.176533	0.176533	0.031164	-0.0123533	0.174221	0.0305318	0.328279
178	59	4.42	0.44935	35	0.920546	0.823467	0.100451	0.097079	0.097079	0.00942434	-0.0123533	0.174221	0.0305318	0.328279
179	64.5	5.2	0.341	0	0.0144081	0.00201093	0.0951438	0.0123971	0.0123971	0.000153689	-0.0666357	0.00243808	-0.0320406	-0.204539
180	64.5	5.2	0.341	0	-0.00612586	0.00201093	0.0951438	-0.00813679	0.00813679	6.62074e-05	-0.0666357	0.00243808	-0.0320406	-0.204539
181	64.5	5.2	0.341	0	-0.000545404	0.00201093	0.0951438	-0.00255633	0.00255633	6.53484e-06	-0.0666357	0.00243808	-0.0320406	-0.204539
182	64.5	5.2	0.341	0	-0.00583691	0.00201093	0.0951438	-0.00784784	0.00784784	6.15885e-05	-0.0666357	0.00243808	-0.0320406	-0.204539
183	64.5	5.2	0.341	0	-0.00189988	0.00201093	0.0951438	-0.00391081	0.00391081	1.52945e-05	-0.0666357	0.00243808	-0.0320406	-0.204539
184	64.5	5.2	0.341	0.0833333	-0.0238425	0.00348095	0.0948639	-0.0273234	0.0273234	0.000746569	-0.0698013	0.00306881	-0.0321783	-0.200397
185	64.5	5.2	0.341	0.0833333	0.0327567	0.00348095	0.0948639	0.0292758	0.0292758	0.000857072	-0.0698013	0.00306881	-0.0321783	-0.200397
186	64.5	5.2	0.341	0.0833333	0.0200246	0.00348095	0.0948639	0.0165437	0.0165437	0.000273693	-0.0698013	0.00306881	-0.0321783	-0.200397
187	64.5	5.2	0.341	0.166667	0.0178575	0.00491771	0.0946596	0.0129398	0.0129398	0.000167437	-0.0729599	0.00368647	-0.0323262	-0.196271
188	64.5	5.2	0.341	0.166667	0.013776	0.00491771	0.0946596	0.00885826	0.00885826	7.84687e-05	-0.0729599	0.00368647	-0.0323262	-0.196271
189	64.5	5.2	0.341	0.166667	0.0150763	0.00491771	0.0946596	0.0101586	0.0101586	0.000103196	-0.0729599	0.00368647	-0.0323262	-0.196271
190	64.5	5.2	0.341	1	0.0121686	0.0175319	0.0954095	-0.00536324	0.00536324	2.87643e-05	-0.103661	0.00909903	-0.0343315	-0.156363
191	64.5	5.2	0.341	1	0.02286	0.0175319	0.0954095	0.00532812	0.00532812	2.83889e-05	-0.103661	0.00909903	-0.0343315	-0.156363
192	64.5	5.2	0.341	1	-0.000635703	0.0175319	0.0954095	-0.0181676	0.0181676	0.000330061	-0.103661	0.00909903	-0.0343315	-0.156363
193	64.5	5.2	0.341	3	0.0390235	0.0386964	0.0997468	0.000327074	0.000327074	1.06977e-07	-0.161899	0.0161624	-0.0417368	-0.0766193
194	64.5	5.2	0.341	3	0.0277	0.0386964	0.0997468	-0.0109964	0.0109964	0.00012092	-0.161899	0.0161624	-0.0417368	-0.0766193
195	64.5	5.2	0.341	3	0.0325761	0.0386964	0.0997468	-0.00612025	0.00612025	3.74575e-05	-0.161899	0.0161624	-0.0417368	-0.0766193
196	64.5	5.2	0.341	6	0.0505636	0.0693311	0.100652	-0.0187675	0.0187675	0.000352219	-0.195821	0.014784	-0.0523771	-4.37e-05
197	64.5	5.2	0.341	6	0.0785924	0.0693311	0.100652	0.00926122	0.00926122	8.57701e-05	-0.195821	0.014784	-0.0523771	-4.37e-05
198	64.5	5.2	0.341	6	0.0880737	0.0693311	0.100652	0.0187426	0.0187426	0.000351284	-0.195821	0.014784	-0.0523771	-4.37e-05
199	64.5	5.2	0.341	9	0.0765877	0.12664	0.103317	-0.0500522	0.0500522	0.00250523	-0.194947	0.0148143	-0.0544988	0.0584828
200	64.5	5.2	0.341	9	0.151933	0.12664	0.103317	0.025293	0.025293	0.000639734	-0.194947	0.0148143	-0.0544988	0.0584828
201	64.5	5.2	0.341	9	0.183465	0.12664	0.103317	0.0568253	0.0568253	0.00322911	-0.194947	0.0148143	-0.0544988	0.0584828
202	64.5	5.2	0.341	12	0.193434	0.21077	0.103349	-0.0173357	0.0173357	0.000300527	-0.188158	0.0251119	-0.0483622	0.11939
203	64.5	5.2	0.341	12	0.223431	0.21077	0.103349	0.0126615	0.0126615	0.000160314	-0.188158	0.0251119	-0.0483622	0.11939
204	64.5	5.2	0.341	12	0.249961	0.21077	0.103349	0.0391913	0.0391913	0.00153595	-0.188158	0.0251119	-0.0483622	0.11939
205	64.5	5.2	0.341	15	0.31187	0.259565	0.101006	0.0523045	0.0523045	0.00273577	-0.190551	0.0320046	-0.0444321	0.159756
206	64.5	5.2	0.341	15	0.207575	0.259565	0.101006	-0.0519904	0.0519904	0.002703	-0.190551	0.0320046	-0.0444321	0.159756
207	64.5	5.2	0.341	15	0.257926	0.259565	0.101006	-0.00163988	0.00163988	2.6892e-06	-0.190551	0.0320046	-0.0444321	0.159756
208	64.5	5.2	0.341	18	0.314416	0.269452	0.103491	0.0449648	0.0449648	0.00202183	-0.196372	0.0294378	-0.0425675	0.176164
209	64.5	5.2	0.341	18	0.317541	0.269452	0.103491	0.0480891	0.0480891	0.00231256	-0.196372	0.0294378	-0.0425675	0.176164
210	64.5	5.2	0.341	18	0.22009	0.269452	0.103491	-0.0493612	0.0493612	0.00243653	-0.196372	0.0294378	-0.0425675	0.176164
211	64.5	5.2	0.341	21	0.359223	0.284618	0.107524	0.0746045	0.0746045	0.00556583	-0.192962	0.0255815	-0.0384792	0.187689
212	64.5	5.2	0.341	21	0.292004	0.284618	0.107524	0.00738613	0.00738613	5.45549e-05	-0.192962	0.0255815	-0.0384792	0.187689
213	64.5	5.2	0.341	21	0.272391	0.284618	0.107524	-0.0122267	0.0122267	0.000149493	-0.192962	0.0255815	-0.0384792	0.187689
214	64.5	5.2	0.341	28	0.446126	0.419472	0.110155	0.0266544	0.0266544	0.000710458	-0.152914	0.0283296	-0.0166208	0.257888
215	64.5	5.2	0.341	28	0.389129	0.419472	0.110155	-0.0303421	0.0303421	0.000920643	-0.152914	0.0283296	-0.0166208	0.257888
216	64.5	5.2	0.341	35	0.468827	0.475201	0.126142	-0.00637439	0.00637439	4.06329e-05	-0.137779	0.026715	0.00091781	0.282559
217	64.5	5.2	0.341	35	0.443218	0.475201	0.126142	-0.0319831	0.0319831	0.00102292	-0.137779	0.026715	0.00091781	0.282559
218	45	10.6	0.723	0	0.000840763	0.0368188	0.097484	-0.0359781	0.0359781	0.00129442	0.087612	-0.0116741	-0.0138692	-0.328039
219	45	10.6	0.723	0	-0.0379321	0.0368188	0.097484	-0.0747509	0.0747509	0.0055877	0.087612	-0.0116741	-0.0138692	-0.328039
220	45	10.6	0.723	0	0.0384014	0.0368188	0.097484	0.00158254	0.00158254	2.50445e-06	0.087612	-0.0116741	-0.0138692	-0.328039
221	45	10.6	0.723	0	-0.0153293	0.0368188	0.097484	-0.0521481	0.0521481	0.00271942	0.087612	-0.0116741	-0.0138692	-0.328039
222	45	10.6	0.723	0	0.00234632	0.0368188	0.097484	-0.0344725	0.0344725	0.00118835	0.087612	-0.0116741	-0.0138692	-0.328039
223	45	10.6	0.723	0	0.0116729	0.0368188	0.097484	-0.0251459	0.0251459	0.000632317	0.087612	-0.0116741	-0.0138692	-0.328039
224	45	10.6	0.723	1	0.29327	0.178251	0.0951651	0.115019	0.115019	0.0132294	0.130863	-0.0197363	-0.0098167	-0.225848
225	45	10.6	0.723	1	0.203484	0.178251	0.0951651	0.0252334	0.0252334	0.000636727	0.130863	-0.0197363	-0.0098167	-0.225848
226	45	10.6	0.723	1	0.243587	0.178251	0.0951651	0.0653359	0.0653359	0.00426878	0.130863	-0.0197363	-0.0098167	-0.225848
227	45	10.6	0.723	2	0.412756	0.317603	0.0956543	0.0951528	0.0951528	0.00905405	0.173992	-0.0257176	-0.0060151	-0.127444
228	45	10.6	0.723	2	0.355799	0.317603	0.0956543	0.038196	0.038196	0.00145893	0.173992	-0.0257176	-0.0060151	-0.127444
229	45	10.6	0.723	2	0.233713	0.317603	0.0956543	-0.0838907	0.0838907	0.00703765	0.173992	-0.0257176	-0.0060151	-0.127444
230	45	10.6	0.723	3	0.412561	0.451257	0.0960112	-0.0386961	0.0386961	0.00149739	0.214986	-0.0275987	-0.0022526	-0.0366662
231	45	10.6	0.723	3	0.537033	0.451257	0.0960112	0.085776	0.085776	0.00735752	0.214986	-0.0275987	-0.0022526	-0.0366662
232	45	10.6	0.723	3	0.268223	0.451257	0.0960112	-0.183034	0.183034	0.0335013	0.214986	-0.0275987	-0.0022526	-0.0366662
233	45	10.6	0.723	4	0.692085	0.582415	0.0961346	0.10967	0.10967	0.0120275	0.253697	-0.0229996	0.00250297	0.0464261
234	45	10.6	0.723	4	0.675348	0.582415	0.0961346	0.0929329	0.0929329	0.00863652	0.253697	-0.0229996	0.00250297	0.0464261
235	45	10.6	0.723	4	0.515212	0.582415	0.0961346	-0.0672032	0.0672032	0.00451627	0.253697	-0.0229996	0.00250297	0.0464261
236	45	10.6	0.723	5	0.573577	0.712105	0.0959635	-0.138529	0.138529	0.0191902	0.289912	-0.0115667	0.00872011	0.122251
237	45	10.6	0.723	5	0.564504	0.712105	0.0959635	-0.147601	0.147601	0.021786	0.289912	-0.0115667	0.00872011	0.122251
238	45	10.6	0.723	5	0.718403	0.712105	0.0959635	0.00629783	0.00629783	3.96627e-05	0.289912	-0.0115667	0.00872011	0.122251
239	45	10.6	0.723	6	0.981953	0.835364	0.0960635	0.146589	0.146589	0.0214883	0.322403	0.00448987	0.0158823	0.1898
240	45	10.6	0.723	6	0.803281	0.835364	0.0960635	-0.0320832	0.0320832	0.00102933	0.322403	0.00448987	0.0158823	0.1898
241	45	10.6	0.723	6	0.83259	0.835364	0.0960635	-0.00277378	0.00277378	7.69388e-06	0.322403	0.00448987	0.0158823	0.1898
242	45	10.6	0.723	7	0.981992	0.94217	0.100056	0.039822	0.039822	0.00158579	0.348983	0.0212606	0.022611	0.246526
243	45	10.6	0.723	7	0.940443	0.94217	0.100056	-0.00172739	0.00172739	2.98386e-06	0.348983	0.0212606	0.022611	0.246526
244	45	10.6	0.723	7	0.9082	0.94217	0.100056	-0.0339697	0.0339697	0.00115394	0.348983	0.0212606	0.022611	0.246526
245	50	7.68	0.5	0	-0.168011	-0.0139329	0.0975129	-0.154078	0.154078	0.0237401	0.00116407	-0.0501377	-0.0320396	-0.235708
246	50	7.68	0.5	0	0.0496627	-0.0139329	0.0975129	0.0635955	0.0635955	0.00404439	0.00116407	-0.0501377	-0.0320396	-0.235708
247	50	7.68	0.5	0	0.293185	-0.0139329	0.0975129	0.307118	0.307118	0.0943213	0.00116407	-0.0501377	-0.0320396	-0.235708
248	50	7.68	0.5	0	-0.0704137	-0.0139329	0.0975129	-0.0564808	0.0564808	0.00319008	0.00116407	-0.0501377	-0.0320396	-0.235708
249	50	7.68	0.5	0	-0.0924685	-0.0139329	0.0975129	-0.0785356	0.0785356	0.00616784	0.00116407	-0.0501377	-0.0320396	-0.235708
250	50	7.68	0.5	0	-0.0119542	-0.0139329	0.0975129	0.00197869	0.00197869	3.9152e-06	0.00116407	-0.0501377	-0.0320396	-0.235708
251	50	7.68	0.5	1	-0.029657	0.0172204	0.0985564	-0.0468774	0.0468774	0.0021975	-0.0076944	-0.0585415	-0.0419099	-0.177422
252	50	7.68	0.5	1	-0.0173266	0.0172204	0.0985564	-0.034547	0.034547	0.0011935	-0.0076944	-0.0585415	-0.0419099	-0.177422
253	50	7.68	0.5	1	-0.0136767	0.0172204	0.0985564	-0.0308971	0.0308971	0.000954634	-0.0076944	-0.0585415	-0.0419099	-0.177422
254	50	7.68	0.5	7	0.170995	0.127313	0.10915	0.0436817	0.0436817	0.00190809	-0.0402683	-0.0799513	-0.101384	0.0461278
255	50	7.68	0.5	7	0.0748749	0.127313	0.10915	-0.0524383	0.0524383	0.00274977	-0.0402683	-0.0799513	-0.101384	0.0461278
256	50	7.68	0.5	7	0.149334	0.127313	0.10915	0.0220204	0.0220204	0.000484896	-0.0402683	-0.0799513	-0.101384	0.0461278
257	50	7.68	0.5	14	0.252287	0.242299	0.104137	0.00998783	0.00998783	9.97568e-05	-0.0295911	-0.088457	-0.103974	0.161532
258	50	7.68	0.5	14	0.222558	0.242299	0.104137	-0.0197414	0.0197414	0.000389724	-0.0295911	-0.088457	-0.103974	0.161532
259	50	7.68	0.5	14	0.238705	0.242299	0.104137	-0.00359381	0.00359381	1.29154e-05	-0.0295911	-0.088457	-0.103974	0.161532
260	50	7.68	0.5	21	0.435837	0.380862	0.104185	0.0549744	0.0549744	0.00302218	0.0098057	-0.0815653	-0.08635	0.236183
261	50	7.68	0.5	21	0.366908	0.380862	0.104185	-0.013954	0.013954	0.000194715	0.0098057	-0.0815653	-0.08635	0.236183
262	50	7.68	0.5	21	0.320822	0.380862	0.104185	-0.0600406	0.0600406	0.00360488	0.0098057	-0.0815653	-0.08635	0.236183
263	50	7.68	0.5	28	0.44234	0.528509	0.104507	-0.0861692	0.0861692	0.00742513	0.037401	-0.0519846	-0.060291	0.300595
264	50	7.68	0.5	28	0.540793	0.528509	0.104507	0.0122835	0.0122835	0.000150884	0.037401	-0.0519846	-0.060291	0.300595
265	50	7.68	0.5	28	0.602238	0.528509	0.104507	0.0737284	0.0737284	0.00543587	0.037401	-0.0519846	-0.060291	0.300595
266	50	7.68	0.5	35	0.687764	0.639082	0.110504	0.0486814	0.0486814	0.00236988	0.0392131	-0.0287381	-0.0173702	0.343189
267	50	7.68	0.5	35	0.599775	0.639082	0.110504	-0.0393071	0.0393071	0.00154505	0.0392131	-0.0287381	-0.0173702	0.343189
268	50	7.68	0.5	35	0.849207	0.639082	0.110504	0.210124	0.210124	0.0441523	0.0392131	-0.0287381	-0.0173702	0.343189
269	60	8.22	0.715	0	-0.0694966	0.0182306	0.0965913	-0.0877273	0.0877273	0.00769607	-0.0494005	-0.0220015	-0.0190072	-0.194149
270	60	8.22	0.715	0	0.0522491	0.0182306	0.0965913	0.0340184	0.0340184	0.00115725	-0.0494005	-0.0220015	-0.0190072	-0.194149
271	60	8.22	0.715	0	0.0109118	0.0182306	0.0965913	-0.00731881	0.00731881	5.3565e-05	-0.0494005	-0.0220015	-0.0190072	-0.194149
272	60	8.22	0.715	0	-0.00308526	0.0182306	0.0965913	-0.0213159	0.0213159	0.000454368	-0.0494005	-0.0220015	-0.0190072	-0.194149
273	60	8.22	0.715	0	0.00277035	0.0182306	0.0965913	-0.0154603	0.0154603	0.000239021	-0.0494005	-0.0220015	-0.0190072	-0.194149
274	60	8.22	0.715	0	0.00665061	0.0182306	0.0965913	-0.01158	0.01158	0.000134097	-0.0494005	-0.0220015	-0.0190072	-0.194149
275	60	8.22	0.715	1	0.115326	0.0573647	0.0972139	0.0579617	0.0579617	0.00335956	-0.062485	-0.0235809	-0.0189275	-0.140431
276	60	8.22	0.715	1	0.111519	0.0573647	0.0972139	0.0541541	0.0541541	0.00293267	-0.062485	-0.0235809	-0.0189275	-0.140431
277	60	8.22	0.715	1	0.0694262	0.0573647	0.0972139	0.0120615	0.0120615	0.00014548	-0.062485	-0.0235809	-0.0189275	-0.140431
278	60	8.22	0.715	7	0.127883	0.163909	0.101663	-0.0360258	0.0360258	0.00129786	-0.141508	-0.0260479	-0.0257837	0.0544595
279	60	8.22	0.715	7	0.162418	0.163909	0.101663	-0.00149108	0.00149108	2.22333e-06	-0.141508	-0.0260479	-0.0257837	0.0544595
280	60	8.22	0.715	7	0.253555	0.163909	0.101663	0.0896464	0.0896464	0.00803648	-0.141508	-0.0260479	-0.0257837	0.0544595
281	60	8.22	0.715	14	0.176715	0.218616	0.105247	-0.0419012	0.0419012	0.00175571	-0.153682	-0.0448341	-0.0277257	0.142069
282	60	8.22	0.715	14	0.267905	0.218616	0.105247	0.0492892	0.0492892	0.00242942	-0.153682	-0.0448341	-0.0277257	0.142069
283	60	8.22	0.715	14	0.159857	0.218616	0.105247	-0.058759	0.058759	0.00345261	-0.153682	-0.0448341	-0.0277257	0.142069
284	60	8.22	0.715	21	0.219816	0.224055	0.105423	-0.00423971	0.00423971	1.79751e-05	-0.157781	-0.0588653	-0.0199768	0.15789
285	60	8.22	0.715	21	0.226579	0.224055	0.105423	0.00252321	0.00252321	6.36657e-06	-0.157781	-0.0588653	-0.0199768	0.15789
286	60	8.22	0.715	21	0.171006	0.224055	0.105423	-0.053049	0.053049	0.0028142	-0.157781	-0.0588653	-0.0199768	0.15789
287	60	8.22	0.715	28	0.322675	0.247206	0.112129	0.0754697	0.0754697	0.00569568	-0.163071	-0.0744698	0.00030388	0.181654
288	60	8.22	0.715	28	0.205788	0.247206	0.112129	-0.041418	0.041418	0.00171545	-0.163071	-0.0744698	0.00030388	0.181654
289	60	8.22	0.715	28	0.217495	0.247206	0.112129	-0.0297111	0.0297111	0.000882752	-0.163071	-0.0744698	0.00030388	0.181654
290	60	8.22	0.715	35	0.327939	0.37859	0.108454	-0.0506517	0.0506517	0.00256559	-0.126403	-0.066238	0.0177657	0.250677
291	60	8.22	0.715	35	0.329405	0.37859	0.108454	-0.049185	0.049185	0.00241917	-0.126403	-0.066238	0.0177657	0.250677
292	60	8.22	0.715	35	0.348879	0.37859	0.108454	-0.0297111	0.0297111	0.000882748	-0.126403	-0.066238	0.0177657	0.250677
293	60	8.22	0.715	42	0.337476	0.300791	0.113937	0.0366851	0.0366851	0.0013458	-0.138812	-0.0327246	0.0172441	0.152295
294	60	8.22	0.715	42	0.398631	0.300791	0.113937	0.0978398	0.0978398	0.00957263	-0.138812	-0.0327246	0.0172441	0.152295
295	60	8.22	0.715	42	0.302704	0.300791	0.113937	0.00191257	0.00191257	3.65791e-06	-0.138812	-0.0327246	0.0172441	0.152295
296	60	8.22	0.715	49	0.408021	0.353975	0.110206	0.0540465	0.0540465	0.00292102	-0.112489	0.0108041	0.0224861	0.130385
297	60	8.22	0.715	49	0.345473	0.353975	0.110206	-0.00850225	0.00850225	7.22882e-05	-0.112489	0.0108041	0.0224861	0.130385
298	60	8.22	0.715	49	0.381388	0.353975	0.110206	0.0274132	0.0274132	0.000751485	-0.112489	0.0108041	0.0224861	0.130385
299	60	8.22	0.715	56	0.466674	0.379383	0.102778	0.0872914	0.0872914	0.00761979	-0.0615188	0.0253021	0.0218032	0.0910077
300	60	8.22	0.715	56	0.402392	0.379383	0.102778	0.0230095	0.0230095	0.000529439	-0.0615188	0.0253021	0.0218032	0.0910077
301	60	8.22	0.715	56	0.352817	0.379383	0.102778	-0.0265661	0.0265661	0.000705758	-0.0615188	0.0253021	0.0218032	0.0910077
302	60	8.22	0.715	63	0.445373	0.430082	0.109499	0.0152902	0.0152902	0.000233791	-0.00347	0.0339558	0.0182969	0.078511
303	60	8.22	0.715	63	0.51366	0.430082	0.109499	0.0835778	0.0835778	0.00698526	-0.00347	0.0339558	0.0182969	0.078511
304	60	8.22	0.715	63	0.372956	0.430082	0.109499	-0.0571265	0.0571265	0.00326344	-0.00347	0.0339558	0.0182969	0.078511
305	61	9.4	0.533	0	-0.011606	-0.00479467	0.0957729	-0.00681132	0.00681132	4.63941e-05	-0.0651722	-0.03133	-0.0313933	-0.179688
306	61	9.4	0.533	0	0.00361661	-0.00479467	0.0957729	0.00841128	0.00841128	7.07496e-05	-0.0651722	-0.03133	-0.0313933	-0.179688
307	61	9.4	0.533	0	-0.00433297	-0.00479467	0.0957729	0.000461699	0.000461699	2.13166e-07	-0.0651722	-0.03133	-0.0313933	-0.179688
308	61	9.4	0.533	0	-0.00024376	-0.00479467	0.0957729	0.00455091	0.00455091	2.07107e-05	-0.0651722	-0.03133	-0.0313933	-0.179688
309	61	9.4	0.533	0	0.00512892	-0.00479467	0.0957729	0.00992359	0.00992359	9.84775e-05	-0.0651722	-0.03133	-0.0313933	-0.179688
310	61	9.4	0.533	0	0.00743718	-0.00479467	0.0957729	0.0122318	0.0122318	0.000149618	-0.0651722	-0.03133	-0.0313933	-0.179688
311	61	9.4	0.533	0.0833333	-2.48735e-05	-0.00342074	0.095494	0.00339587	0.00339587	1.15319e-05	-0.0665664	-0.0321144	-0.0315268	-0.176002
312	61	9.4	0.533	0.0833333	-0.00820329	-0.00342074	0.095494	-0.00478254	0.00478254	2.28727e-05	-0.0665664	-0.0321144	-0.0315268	-0.176002
313	61	9.4	0.533	0.0833333	0.00682032	-0.00342074	0.095494	0.0102411	0.0102411	0.000104879	-0.0665664	-0.0321144	-0.0315268	-0.176002
314	61	9.4	0.533	0.166667	0.000383052	-0.00208372	0.095282	0.00246677	0.00246677	6.08496e-06	-0.0679682	-0.032904	-0.0316671	-0.172333
315	61	9.4	0.533	0.166667	-0.0120139	-0.00208372	0.095282	-0.00993019	0.00993019	9.86087e-05	-0.0679682	-0.032904	-0.0316671	-0.172333
316	61	9.4	0.533	0.166667	0.0045817	-0.00208372	0.095282	0.00666542	0.00666542	4.44278e-05	-0.0679682	-0.032904	-0.0316671	-0.172333
317	61	9.4	0.533	1	0.0113075	0.00922915	0.0958058	0.00207835	0.00207835	4.31954e-06	-0.0822634	-0.0408878	-0.0334171	-0.136991
318	61	9.4	0.533	1	-0.00556669	0.00922915	0.0958058	-0.0147958	0.0147958	0.000218917	-0.0822634	-0.0408878	-0.0334171	-0.136991
319	61	9.4	0.533	1	0.00649199	0.00922915	0.0958058	-0.00273716	0.00273716	7.49205e-06	-0.0822634	-0.0408878	-0.0334171	-0.136991
320	61	9.4	0.533	3	0.00580548	0.0248065	0.101266	-0.019001	0.019001	0.000361037	-0.115492	-0.0566793	-0.0393658	-0.0664445
321	61	9.4	0.533	3	0.0186203	0.0248065	0.101266	-0.00618614	0.00618614	3.82683e-05	-0.115492	-0.0566793	-0.0393658	-0.0664445
322	61	9.4	0.533	3	0.00752673	0.0248065	0.101266	-0.0172797	0.0172797	0.000298589	-0.115492	-0.0566793	-0.0393658	-0.0664445
323	61	9.4	0.533	6	0.0655517	0.0485226	0.10281	0.0170291	0.0170291	0.00028999	-0.151588	-0.0630958	-0.0476478	0.0080658
324	61	9.4	0.533	6	0.0418323	0.0485226	0.10281	-0.00669029	0.00669029	4.476e-05	-0.151588	-0.0630958	-0.0476478	0.0080658
325	61	9.4	0.533	6	0.0229483	0.0485226	0.10281	-0.0255743	0.0255743	0.000654043	-0.151588	-0.0630958	-0.0476478	0.0080658
326	61	9.4	0.533	9	0.0729938	0.0837254	0.103016	-0.0107316	0.0107316	0.000115167	-0.165097	-0.0641248	-0.0505553	0.060714
327	61	9.4	0.533	9	0.0714517	0.0837254	0.103016	-0.0122737	0.0122737	0.000150645	-0.165097	-0.0641248	-0.0505553	0.060714
328	61	9.4	0.533	9	0.0944447	0.0837254	0.103016	0.0107193	0.0107193	0.000114904	-0.165097	-0.0641248	-0.0505553	0.060714
329	61	9.4	0.533	12	0.137655	0.128546	0.102779	0.0091091	0.0091091	8.29758e-05	-0.157028	-0.0715564	-0.0481702	0.102512
330	61	9.4	0.533	12	0.0830029	0.128546	0.102779	-0.045543	0.045543	0.00207416	-0.157028	-0.0715564	-0.0481702	0.102512
331	61	9.4	0.533	12	0.123169	0.128546	0.102779	-0.00537723	0.00537723	2.89146e-05	-0.157028	-0.0715564	-0.0481702	0.102512
332	61	9.4	0.533	15	0.13861	0.176733	0.100098	-0.038123	0.038123	0.00145336	-0.141367	-0.0793546	-0.0416492	0.136316
333	61	9.4	0.533	15	0.207102	0.176733	0.100098	0.0303687	0.0303687	0.000922261	-0.141367	-0.0793546	-0.0416492	0.136316
334	61	9.4	0.533	15	0.171841	0.176733	0.100098	-0.00489195	0.00489195	2.39312e-05	-0.141367	-0.0793546	-0.0416492	0.136316
335	61	9.4	0.533	18	0.190755	0.216003	0.100394	-0.025248	0.025248	0.000637462	-0.131541	-0.0821085	-0.0312181	0.158082
336	61	9.4	0.533	18	0.230005	0.216003	0.100394	0.0140024	0.0140024	0.000196067	-0.131541	-0.0821085	-0.0312181	0.158082
337	61	9.4	0.533	18	0.252969	0.216003	0.100394	0.0369656	0.0369656	0.00136646	-0.131541	-0.0821085	-0.0312181	0.158082
338	61	9.4	0.533	21	0.273206	0.21729	0.101886	0.0559156	0.0559156	0.00312655	-0.134058	-0.0877415	-0.0229653	0.159267
339	61	9.4	0.533	21	0.158151	0.21729	0.101886	-0.0591394	0.0591394	0.00349746	-0.134058	-0.0877415	-0.0229653	0.159267
340	61	9.4	0.533	21	0.226722	0.21729	0.101886	0.00943195	0.00943195	8.89617e-05	-0.134058	-0.0877415	-0.0229653	0.159267
341	61	9.4	0.533	28	0.317759	0.298858	0.107767	0.0189007	0.0189007	0.000357237	-0.114947	-0.0992988	0.00455687	0.205759
342	61	9.4	0.533	28	0.299741	0.298858	0.107767	0.00088233	0.00088233	7.78506e-07	-0.114947	-0.0992988	0.00455687	0.205759
343	61	9.4	0.533	28	0.314347	0.298858	0.107767	0.0154881	0.0154881	0.00023988	-0.114947	-0.0992988	0.00455687	0.205759
344	61	9.4	0.533	35	0.719566	0.569046	0.108154	0.15052	0.15052	0.0226564	-0.0532791	-0.0539396	0.0484163	0.325059
345	61	9.4	0.533	35	0.558535	0.569046	0.108154	-0.0105108	0.0105108	0.000110476	-0.0532791	-0.0539396	0.0484163	0.325059
346	61	9.4	0.533	35	0.476233	0.569046	0.108154	-0.0928122	0.0928122	0.00861411	-0.0532791	-0.0539396	0.0484163	0.325059
347	64.5	10.46	0.526	0	0.0146451	-0.000172471	0.0954365	0.0148176	0.0148176	0.00021956	-0.0616915	-0.0308964	-0.0246508	-0.185722
348	64.5	10.46	0.526	0	0.0137008	-0.000172471	0.0954365	0.0138733	0.0138733	0.000192468	-0.0616915	-0.0308964	-0.0246508	-0.185722
349	64.5	10.46	0.526	0	0.00149658	-0.000172471	0.0954365	0.00166905	0.00166905	2.78573e-06	-0.0616915	-0.0308964	-0.0246508	-0.185722
350	64.5	10.46	0.526	0	0.0285508	-0.000172471	0.0954365	0.0287233	0.0287233	0.000825027	-0.0616915	-0.0308964	-0.0246508	-0.185722
351	64.5	10.46	0.526	0	-0.030181	-0.000172471	0.0954365	-0.0300085	0.0300085	0.000900513	-0.0616915	-0.0308964	-0.0246508	-0.185722
352	64.5	10.46	0.526	0	-0.0282123	-0.000172471	0.0954365	-0.0280398	0.0280398	0.000786232	-0.0616915	-0.0308964	-0.0246508	-0.185722
353	64.5	10.46	0.526	0.0833333	0.0233841	0.000515345	0.0951012	0.0228687	0.0228687	0.000522978	-0.0634101	-0.0314479	-0.0248056	-0.18261
354	64.5	10.46	0.526	0.0833333	0.016017	0.000515345	0.0951012	0.0155016	0.0155016	0.0002403	-0.0634101	-0.0314479	-0.0248056	-0.18261
355	64.5	10.46	0.526	0.0833333	-0.00520239	0.000515345	0.0951012	-0.00571774	0.00571774	3.26925e-05	-0.0634101	-0.0314479	-0.0248056	-0.18261
356	64.5	10.46	0.526	0.166667	0.00124715	0.00121575	0.0948455	3.13974e-05	3.13974e-05	9.85796e-10	-0.0651213	-0.0319947	-0.024962	-0.179495
357	64.5	10.46	0.526	0.166667	0.0264396	0.00121575	0.0948455	0.0252238	0.0252238	0.000636241	-0.0651213	-0.0319947	-0.024962	-0.179495
358	64.5	10.46	0.526	0.166667	-0.049396	0.00121575	0.0948455	-0.0506118	0.0506118	0.00256155	-0.0651213	-0.0319947	-0.024962	-0.179495
359	64.5	10.46	0.526	1	0.0214153	0.00906522	0.0954244	0.0123501	0.0123501	0.000152525	-0.0815821	-0.0370745	-0.0265599	-0.148507
360	64.5	10.46	0.526	1	-0.0137008	0.00906522	0.0954244	-0.022766	0.022766	0.000518293	-0.0815821	-0.0370745	-0.0265599	-0.148507
361	64.5	10.46	0.526	1	-0.00649408	0.00906522	0.0954244	-0.0155593	0.0155593	0.000242092	-0.0815821	-0.0370745	-0.0265599	-0.148507
362	64.5	10.46	0.526	3	0.036782	0.0358044	0.101711	0.000977599	0.000977599	9.55699e-07	-0.112799	-0.0446017	-0.0298203	-0.0797629
363	64.5	10.46	0.526	3	0.0456813	0.0358044	0.101711	0.0098769	0.0098769	9.75532e-05	-0.112799	-0.0446017	-0.0298203	-0.0797629
364	64.5	10.46	0.526	3	0.0420735	0.0358044	0.101711	0.00626908	0.00626908	3.93013e-05	-0.112799	-0.0446017	-0.0298203	-0.0797629
365	64.5	10.46	0.526	6	0.0968946	0.0964792	0.103167	0.000415417	0.000415417	1.72571e-07	-0.136056	-0.0431516	-0.0311293	0.00402719
366	64.5	10.46	0.526	6	0.11088	0.0964792	0.103167	0.0144013	0.0144013	0.000207398	-0.136056	-0.0431516	-0.0311293	0.00402719
367	64.5	10.46	0.526	6	0.102427	0.0964792	0.103167	0.00594742	0.00594742	3.53717e-05	-0.136056	-0.0431516	-0.0311293	0.00402719
368	64.5	10.46	0.526	9	0.22813	0.182003	0.100643	0.0461273	0.0461273	0.00212773	-0.131986	-0.0356634	-0.0261893	0.0730533
369	64.5	10.46	0.526	9	0.153257	0.182003	0.100643	-0.0287462	0.0287462	0.000826343	-0.131986	-0.0356634	-0.0261893	0.0730533
370	64.5	10.46	0.526	9	0.143903	0.182003	0.100643	-0.0380998	0.0380998	0.00145159	-0.131986	-0.0356634	-0.0261893	0.0730533
371	64.5	10.46	0.526	12	0.306113	0.258133	0.101155	0.0479801	0.0479801	0.00230209	-0.113294	-0.0359584	-0.0198345	0.124431
372	64.5	10.46	0.526	12	0.275433	0.258133	0.101155	0.0173003	0.0173003	0.000299299	-0.113294	-0.0359584	-0.0198345	0.124431
373	64.5	10.46	0.526	12	0.246125	0.258133	0.101155	-0.0120077	0.0120077	0.000144186	-0.113294	-0.0359584	-0.0198345	0.124431
374	64.5	10.46	0.526	15	0.424245	0.276924	0.107755	0.147321	0.147321	0.0217035	-0.107096	-0.0470413	-0.0183318	0.146604
375	64.5	10.46	0.526	15	0.307119	0.276924	0.107755	0.0301958	0.0301958	0.000911789	-0.107096	-0.0470413	-0.0183318	0.146604
376	64.5	10.46	0.526	15	0.246196	0.276924	0.107755	-0.0307274	0.0307274	0.000944173	-0.107096	-0.0470413	-0.0183318	0.146604
377	64.5	10.46	0.526	18	0.448172	0.304397	0.104685	0.143775	0.143775	0.0206712	-0.100971	-0.0488057	-0.0124099	0.163795
378	64.5	10.46	0.526	18	0.379392	0.304397	0.104685	0.0749945	0.0749945	0.00562418	-0.100971	-0.0488057	-0.0124099	0.163795
379	64.5	10.46	0.526	18	0.227409	0.304397	0.104685	-0.0769884	0.0769884	0.00592722	-0.100971	-0.0488057	-0.0124099	0.163795
380	64.5	10.46	0.526	21	0.398794	0.368221	0.107289	0.0305729	0.0305729	0.000934702	-0.0814986	-0.0404296	-0.0005377	0.187898
381	64.5	10.46	0.526	21	0.340659	0.368221	0.107289	-0.0275621	0.0275621	0.000759668	-0.0814986	-0.0404296	-0.0005377	0.187898
382	64.5	10.46	0.526	21	0.430863	0.368221	0.107289	0.0626425	0.0626425	0.00392408	-0.0814986	-0.0404296	-0.0005377	0.187898
383	64.5	10.46	0.526	28	0.511625	0.567075	0.109841	-0.0554498	0.0554498	0.00307468	-0.021759	-0.0227766	0.0336984	0.275124
384	64.5	10.46	0.526	28	0.55989	0.567075	0.109841	-0.00718514	0.00718514	5.16262e-05	-0.021759	-0.0227766	0.0336984	0.275124
385	64.5	10.46	0.526	28	0.587933	0.567075	0.109841	0.0208579	0.0208579	0.000435052	-0.021759	-0.0227766	0.0336984	0.275124
386	64.5	10.46	0.526	35	0.614898	0.565887	0.110373	0.0490112	0.0490112	0.0024021	-0.0569182	-0.0230337	0.0449414	0.298109
387	64.5	10.46	0.526	35	0.569261	0.565887	0.110373	0.00337446	0.00337446	1.1387e-05	-0.0569182	-0.0230337	0.0449414	0.298109
388	64.5	10.46	0.526	35	0.536648	0.565887	0.110373	-0.0292385	0.0292385	0.00085489	-0.0569182	-0.0230337	0.0449414	0.298109
389	43	19.8	1.41296	0	0.0236257	0.0187114	0.0977561	0.0049143	0.0049143	2.41503e-05	0.0734311	-0.0155423	-0.0082214	-0.333745
390	43	19.8	1.41296	0	-0.00284975	0.0187114	0.0977561	-0.0215611	0.0215611	0.000464883	0.0734311	-0.0155423	-0.0082214	-0.333745
391	43	19.8	1.41296	0	-0.00996003	0.0187114	0.0977561	-0.0286714	0.0286714	0.00082205	0.0734311	-0.0155423	-0.0082214	-0.333745
392	43	19.8	1.41296	0	-0.0236915	0.0187114	0.0977561	-0.0424029	0.0424029	0.00179801	0.0734311	-0.0155423	-0.0082214	-0.333745
393	43	19.8	1.41296	0	0.0128756	0.0187114	0.0977561	-0.00583576	0.00583576	3.40561e-05	0.0734311	-0.0155423	-0.0082214	-0.333745
394	43	19.8	1.41296	1	0.179506	0.115796	0.0961711	0.0637103	0.0637103	0.004059	0.098286	-0.0263876	-0.0029746	-0.255916
395	43	19.8	1.41296	1	0.0750905	0.115796	0.0961711	-0.0407054	0.0407054	0.00165693	0.098286	-0.0263876	-0.0029746	-0.255916
396	43	19.8	1.41296	1	0.219158	0.115796	0.0961711	0.103362	0.103362	0.0106838	0.098286	-0.0263876	-0.0029746	-0.255916
397	43	19.8	1.41296	3	0.433388	0.356165	0.0983578	0.0772232	0.0772232	0.00596342	0.157106	-0.0316307	0.0169314	-0.0890305
398	43	19.8	1.41296	3	0.414719	0.356165	0.0983578	0.058554	0.058554	0.00342857	0.157106	-0.0316307	0.0169314	-0.0890305
399	43	19.8	1.41296	3	0.356022	0.356165	0.0983578	-0.000143377	0.000143377	2.05569e-08	0.157106	-0.0316307	0.0169314	-0.0890305
400	43	19.8	1.41296	4	0.728521	0.506766	0.0971133	0.221755	0.221755	0.0491754	0.192346	-0.0218046	0.0345237	-0.0010885
401	43	19.8	1.41296	4	0.596351	0.506766	0.0971133	0.0895851	0.0895851	0.00802549	0.192346	-0.0218046	0.0345237	-0.0010885
402	43	19.8	1.41296	4	0.391827	0.506766	0.0971133	-0.114939	0.114939	0.0132109	0.192346	-0.0218046	0.0345237	-0.0010885
403	43	19.8	1.41296	5	0.452471	0.680453	0.0946368	-0.227982	0.227982	0.0519759	0.231942	-0.0021811	0.0584851	0.0894188
404	43	19.8	1.41296	5	0.586428	0.680453	0.0946368	-0.0940249	0.0940249	0.00884069	0.231942	-0.0021811	0.0584851	0.0894188
405	43	19.8	1.41296	5	0.435401	0.680453	0.0946368	-0.245052	0.245052	0.0600507	0.231942	-0.0021811	0.0584851	0.0894188
406	43	19.8	1.41296	6	0.745695	0.865733	0.0939197	-0.120038	0.120038	0.0144092	0.27314	0.0247527	0.0864138	0.178638
407	43	19.8	1.41296	6	0.891258	0.865733	0.0939197	0.0255248	0.0255248	0.000651513	0.27314	0.0247527	0.0864138	0.178638
408	43	19.8	1.41296	6	0.78087	0.865733	0.0939197	-0.0848632	0.0848632	0.00720176	0.27314	0.0247527	0.0864138	0.178638
409	43	19.8	1.41296	6	0.964994	0.865733	0.0939197	0.0992609	0.0992609	0.00985273	0.27314	0.0247527	0.0864138	0.178638
410	43	19.8	1.41296	6	0.953962	0.865733	0.0939197	0.0882287	0.0882287	0.00778431	0.27314	0.0247527	0.0864138	0.178638
411	43	19.8	1.41296	6	0.927957	0.865733	0.0939197	0.0622236	0.0622236	0.00387177	0.27314	0.0247527	0.0864138	0.178638
412	43	19.8	1.41296	6	0.972622	0.865733	0.0939197	0.106888	0.106888	0.0114252	0.27314	0.0247527	0.0864138	0.178638
413	43	19.8	1.41296	6	0.98355	0.865733	0.0939197	0.117817	0.117817	0.0138809	0.27314	0.0247527	0.0864138	0.178638
414	43	19.8	1.41296	6	0.874028	0.865733	0.0939197	0.00829456	0.00829456	6.87998e-05	0.27314	0.0247527	0.0864138	0.178638
415	43	19.8	1.41296	6	0.840376	0.865733	0.0939197	-0.025357	0.025357	0.000642976	0.27314	0.0247527	0.0864138	0.178638
416	43	19.8	1.41296	6	0.831592	0.865733	0.0939197	-0.0341414	0.0341414	0.00116563	0.27314	0.0247527	0.0864138	0.178638
417	43	19.8	1.41296	6	0.850957	0.865733	0.0939197	-0.0147762	0.0147762	0.000218336	0.27314	0.0247527	0.0864138	0.178638
418	43	19.8	1.41296	6	0.787651	0.865733	0.0939197	-0.0780821	0.0780821	0.00609682	0.27314	0.0247527	0.0864138	0.178638
419	43	19.8	1.41296	6	0.930524	0.865733	0.0939197	0.0647912	0.0647912	0.00419789	0.27314	0.0247527	0.0864138	0.178638
420	43	19.8	1.41296	6	0.949485	0.865733	0.0939197	0.0837519	0.0837519	0.00701438	0.27314	0.0247527	0.0864138	0.178638
421	43	19.8	1.41296	6	0.9396	0.865733	0.0939197	0.0738671	0.0738671	0.00545635	0.27314	0.0247527	0.0864138	0.178638
422	43	19.8	1.41296	6	0.958815	0.865733	0.0939197	0.0930818	0.0930818	0.00866422	0.27314	0.0247527	0.0864138	0.178638
423	43	19.8	1.41296	6	0.771418	0.865733	0.0939197	-0.0943154	0.0943154	0.00889539	0.27314	0.0247527	0.0864138	0.178638
424	52	19.3	0.739	0	-0.0198771	-0.00490546	0.0960625	-0.0149717	0.0149717	0.000224151	-0.0291797	-0.01067	-0.0205891	-0.247255
425	52	19.3	0.739	0	0.0317418	-0.00490546	0.0960625	0.0366472	0.0366472	0.00134302	-0.0291797	-0.01067	-0.0205891	-0.247255
426	52	19.3	0.739	0	0.00933581	-0.00490546	0.0960625	0.0142413	0.0142413	0.000202814	-0.0291797	-0.01067	-0.0205891	-0.247255
427	52	19.3	0.739	0	-0.00685379	-0.00490546	0.0960625	-0.00194833	0.00194833	3.79599e-06	-0.0291797	-0.01067	-0.0205891	-0.247255
428	52	19.3	0.739	0	-0.00585647	-0.00490546	0.0960625	-0.000951003	0.000951003	9.04407e-07	-0.0291797	-0.01067	-0.0205891	-0.247255
429	52	19.3	0.739	0	-0.00849018	-0.00490546	0.0960625	-0.00358472	0.00358472	1.28502e-05	-0.0291797	-0.01067	-0.0205891	-0.247255
430	52	19.3	0.739	1	0.00241263	0.0136701	0.0956205	-0.0112575	0.0112575	0.00012673	-0.0373407	-0.0241258	-0.0237662	-0.203886
431	52	19.3	0.739	1	-0.00744444	0.0136701	0.0956205	-0.0211145	0.0211145	0.000445823	-0.0373407	-0.0241258	-0.0237662	-0.203886
432	52	19.3	0.739	1	-0.0020124	0.0136701	0.0956205	-0.0156825	0.0156825	0.00024594	-0.0373407	-0.0241258	-0.0237662	-0.203886
433	52	19.3	0.739	3	0.0656896	0.0810796	0.0997485	-0.01539	0.01539	0.000236853	-0.0483942	-0.032223	-0.0275183	-0.113573
434	52	19.3	0.739	3	0.0896835	0.0810796	0.0997485	0.0086039	0.0086039	7.4027e-05	-0.0483942	-0.032223	-0.0275183	-0.113573
435	52	19.3	0.739	3	0.061768	0.0810796	0.0997485	-0.0193115	0.0193115	0.000372936	-0.0483942	-0.032223	-0.0275183	-0.113573
436	52	19.3	0.739	6	0.154926	0.219109	0.102749	-0.0641835	0.0641835	0.00411952	-0.0534934	-0.0130793	-0.0280642	0.0109578
437	52	19.3	0.739	6	0.233996	0.219109	0.102749	0.0148861	0.0148861	0.000221596	-0.0534934	-0.0130793	-0.0280642	0.0109578
438	52	19.3	0.739	6	0.103307	0.219109	0.102749	-0.115802	0.115802	0.0134102	-0.0534934	-0.0130793	-0.0280642	0.0109578
439	52	19.3	0.739	9	0.183306	0.30665	0.0991945	-0.123344	0.123344	0.0152137	-0.0598921	-0.0007329	-0.03031	0.0947964
440	52	19.3	0.739	9	0.55391	0.30665	0.0991945	0.24726	0.24726	0.0611374	-0.0598921	-0.0007329	-0.03031	0.0947964
441	52	19.3	0.739	9	0.249062	0.30665	0.0991945	-0.057588	0.057588	0.00331637	-0.0598921	-0.0007329	-0.03031	0.0947964
442	52	19.3	0.739	12	0.408121	0.393033	0.0985921	0.0150884	0.0150884	0.000227659	-0.0517812	0.0104453	-0.0313863	0.162966
443	52	19.3	0.739	12	0.536263	0.393033	0.0985921	0.14323	0.14323	0.0205149	-0.0517812	0.0104453	-0.0313863	0.162966
444	52	19.3	0.739	12	0.305096	0.393033	0.0985921	-0.0879364	0.0879364	0.0077328	-0.0517812	0.0104453	-0.0313863	0.162966
445	52	19.3	0.739	15	0.479057	0.535054	0.0988225	-0.0559968	0.0559968	0.00313564	-0.0179745	0.0355439	-0.0261499	0.240846
446	52	19.3	0.739	15	0.417107	0.535054	0.0988225	-0.117947	0.117947	0.0139115	-0.0179745	0.0355439	-0.0261499	0.240846
447	52	19.3	0.739	15	0.560964	0.535054	0.0988225	0.0259098	0.0259098	0.000671316	-0.0179745	0.0355439	-0.0261499	0.240846
448	52	19.3	0.739	18	0.580319	0.621171	0.0988203	-0.0408515	0.0408515	0.00166885	0.00946072	0.0436092	-0.0225359	0.287848
449	52	19.3	0.739	18	0.44295	0.621171	0.0988203	-0.178221	0.178221	0.0317627	0.00946072	0.0436092	-0.0225359	0.287848
450	52	19.3	0.739	18	0.625431	0.621171	0.0988203	0.00426055	0.00426055	1.81523e-05	0.00946072	0.0436092	-0.0225359	0.287848
451	52	19.3	0.739	21	0.706254	0.653389	0.100326	0.0528646	0.0528646	0.00279467	0.0268863	0.0373159	-0.0168079	0.303206
452	52	19.3	0.739	21	0.634223	0.653389	0.100326	-0.0191656	0.0191656	0.000367319	0.0268863	0.0373159	-0.0168079	0.303206
453	52	19.3	0.739	21	0.750891	0.653389	0.100326	0.0975022	0.0975022	0.00950668	0.0268863	0.0373159	-0.0168079	0.303206
454	52	19.3	0.739	28	0.829661	0.836519	0.101524	-0.00685857	0.00685857	4.70399e-05	0.0792269	0.0659444	0.0204675	0.368092
455	52	19.3	0.739	28	0.739746	0.836519	0.101524	-0.0967728	0.0967728	0.00936498	0.0792269	0.0659444	0.0204675	0.368092
456	52	19.3	0.739	28	0.94323	0.836519	0.101524	0.106711	0.106711	0.0113872	0.0792269	0.0659444	0.0204675	0.368092
457	52	19.3	0.739	35	0.828789	0.92157	0.101893	-0.092781	0.092781	0.00860831	0.103271	0.0741324	0.0486232	0.392755
458	52	19.3	0.739	35	0.970216	0.92157	0.101893	0.0486457	0.0486457	0.0023664	0.103271	0.0741324	0.0486232	0.392755
459	52	19.3	0.739	35	0.966478	0.92157	0.101893	0.0449081	0.0449081	0.00201674	0.103271	0.0741324	0.0486232	0.392755
460	52	19.9	0.737	0	-0.0255931	-0.000784519	0.0983838	-0.0248085	0.0248085	0.000615464	-0.0260468	-0.0032668	-0.0194764	-0.254783
461	52	19.9	0.737	0	-0.0123219	-0.000784519	0.0983838	-0.0115374	0.0115374	0.000133111	-0.0260468	-0.0032668	-0.0194764	-0.254783
462	52	19.9	0.737	0	0.0116672	-0.000784519	0.0983838	0.0124517	0.0124517	0.000155046	-0.0260468	-0.0032668	-0.0194764	-0.254783
463	52	19.9	0.737	0	0.0329909	-0.000784519	0.0983838	0.0337754	0.0337754	0.00114078	-0.0260468	-0.0032668	-0.0194764	-0.254783
464	52	19.9	0.737	0	0.00880536	-0.000784519	0.0983838	0.00958988	0.00958988	9.19658e-05	-0.0260468	-0.0032668	-0.0194764	-0.254783
465	52	19.9	0.737	0	-0.0155485	-0.000784519	0.0983838	-0.014764	0.014764	0.000217975	-0.0260468	-0.0032668	-0.0194764	-0.254783
466	52	19.9	0.737	1	-0.02376	0.0167222	0.0962814	-0.0404822	0.0404822	0.00163881	-0.0343326	-0.0171522	-0.0227186	-0.211863
467	52	19.9	0.737	1	0.0389578	0.0167222	0.0962814	0.0222355	0.0222355	0.00049442	-0.0343326	-0.0171522	-0.0227186	-0.211863
468	52	19.9	0.737	1	0.0150154	0.0167222	0.0962814	-0.00170681	0.00170681	2.91318e-06	-0.0343326	-0.0171522	-0.0227186	-0.211863
469	52	19.9	0.737	3	0.0800058	0.0813366	0.0979314	-0.00133079	0.00133079	1.771e-06	-0.0458196	-0.0262394	-0.0267812	-0.122612
470	52	19.9	0.737	3	0.0893396	0.0813366	0.0979314	0.00800299	0.00800299	6.40478e-05	-0.0458196	-0.0262394	-0.0267812	-0.122612
471	52	19.9	0.737	3	0.0575037	0.0813366	0.0979314	-0.0238329	0.0238329	0.000568005	-0.0458196	-0.0262394	-0.0267812	-0.122612
472	52	19.9	0.737	6	0.25991	0.218877	0.0991308	0.0410334	0.0410334	0.00168374	-0.0510442	-0.0070282	-0.0276899	0.00185045
473	52	19.9	0.737	6	0.338817	0.218877	0.0991308	0.11994	0.11994	0.0143857	-0.0510442	-0.0070282	-0.0276899	0.00185045
474	52	19.9	0.737	6	0.0914158	0.218877	0.0991308	-0.127461	0.127461	0.0162463	-0.0510442	-0.0070282	-0.0276899	0.00185045
475	52	19.9	0.737	9	0.424748	0.322714	0.0986164	0.102033	0.102033	0.0104108	-0.054406	0.0115472	-0.0290472	0.0918317
476	52	19.9	0.737	9	0.132286	0.322714	0.0986164	-0.190428	0.190428	0.0362629	-0.054406	0.0115472	-0.0290472	0.0918317
477	52	19.9	0.737	9	0.356549	0.322714	0.0986164	0.033835	0.033835	0.00114481	-0.054406	0.0115472	-0.0290472	0.0918317
478	52	19.9	0.737	12	0.509939	0.464158	0.0988951	0.0457818	0.0457818	0.00209598	-0.0352217	0.0421907	-0.0250476	0.179448
479	52	19.9	0.737	12	0.307121	0.464158	0.0988951	-0.157036	0.157036	0.0246603	-0.0352217	0.0421907	-0.0250476	0.179448
480	52	19.9	0.737	12	0.418706	0.464158	0.0988951	-0.0454516	0.0454516	0.00206585	-0.0352217	0.0421907	-0.0250476	0.179448
481	52	19.9	0.737	15	0.637002	0.680271	0.10013	-0.0432687	0.0432687	0.00187218	0.014	0.0926127	-0.0117906	0.28266
482	52	19.9	0.737	15	0.941706	0.680271	0.10013	0.261435	0.261435	0.0683483	0.014	0.0926127	-0.0117906	0.28266
483	52	19.9	0.737	15	0.393931	0.680271	0.10013	-0.28634	0.28634	0.0819904	0.014	0.0926127	-0.0117906	0.28266
484	52	19.9	0.737	18	0.846797	0.774069	0.0990525	0.072728	0.072728	0.00528937	0.042946	0.103361	-0.0073895	0.332363
485	52	19.9	0.737	18	0.914902	0.774069	0.0990525	0.140833	0.140833	0.0198339	0.042946	0.103361	-0.0073895	0.332363
486	52	19.9	0.737	18	0.785155	0.774069	0.0990525	0.0110858	0.0110858	0.000122896	0.042946	0.103361	-0.0073895	0.332363
487	52	19.9	0.737	21	0.661291	0.743751	0.100308	-0.0824601	0.0824601	0.00679968	0.0467494	0.0761155	-0.0086824	0.32678
488	52	19.9	0.737	21	0.692341	0.743751	0.100308	-0.0514099	0.0514099	0.00264298	0.0467494	0.0761155	-0.0086824	0.32678
489	52	19.9	0.737	21	0.718687	0.743751	0.100308	-0.025064	0.025064	0.000628202	0.0467494	0.0761155	-0.0086824	0.32678
490	52	19.9	0.737	28	0.924385	0.856214	0.101532	0.0681712	0.0681712	0.00464731	0.0845919	0.0795623	0.0227444	0.366527
491	52	19.9	0.737	28	0.730639	0.856214	0.101532	-0.125575	0.125575	0.015769	0.0845919	0.0795623	0.0227444	0.366527
492	52	19.9	0.737	28	0.920485	0.856214	0.101532	0.0642712	0.0642712	0.00413079	0.0845919	0.0795623	0.0227444	0.366527
493	52	19.9	0.737	35	0.988108	0.929494	0.101916	0.0586141	0.0586141	0.00343561	0.106167	0.0833585	0.0502726	0.386908
494	52	19.9	0.737	35	0.961931	0.929494	0.101916	0.0324365	0.0324365	0.00105213	0.106167	0.0833585	0.0502726	0.386908
495	52	19.9	0.737	35	0.854358	0.929494	0.101916	-0.0751357	0.0751357	0.00564538	0.106167	0.0833585	0.0502726	0.386908
496	61	18.4	0.499	0	0.0191541	-0.000924417	0.095296	0.0200785	0.0200785	0.000403146	-0.0766243	-0.0344983	-0.0234885	-0.169102
497	61	18.4	0.499	0	0.0140027	-0.000924417	0.095296	0.0149272	0.0149272	0.00022282	-0.0766243	-0.0344983	-0.0234885	-0.169102
498	61	18.4	0.499	0	-0.00304643	-0.000924417	0.095296	-0.00212201	0.00212201	4.50294e-06	-0.0766243	-0.0344983	-0.0234885	-0.169102
499	61	18.4	0.499	0	0.0158215	-0.000924417	0.095296	0.0167459	0.0167459	0.000280424	-0.0766243	-0.0344983	-0.0234885	-0.169102
500	61	18.4	0.499	0	-0.0276956	-0.000924417	0.095296	-0.0267712	0.0267712	0.000716696	-0.0766243	-0.0344983	-0.0234885	-0.169102
501	61	18.4	0.499	0	-0.0182363	-0.000924417	0.095296	-0.0173118	0.0173118	0.0002997	-0.0766243	-0.0344983	-0.0234885	-0.169102
502	61	18.4	0.499	0.0833333	0.00266372	-0.00102674	0.0950413	0.00369046	0.00369046	1.36195e-05	-0.0778263	-0.0360967	-0.0236466	-0.166246
503	61	18.4	0.499	0.0833333	0.010345	-0.00102674	0.0950413	0.0113717	0.0113717	0.000129316	-0.0778263	-0.0360967	-0.0236466	-0.166246
504	61	18.4	0.499	0.0833333	-0.00175606	-0.00102674	0.0950413	-0.000729317	0.000729317	5.31903e-07	-0.0778263	-0.0360967	-0.0236466	-0.166246
505	61	18.4	0.499	0.166667	-0.0195063	-0.00111761	0.0948739	-0.0183887	0.0183887	0.000338144	-0.0790366	-0.0376776	-0.0238073	-0.163385
506	61	18.4	0.499	0.166667	0.0131798	-0.00111761	0.0948739	0.0142974	0.0142974	0.000204415	-0.0790366	-0.0376776	-0.0238073	-0.163385
507	61	18.4	0.499	0.166667	0.00911559	-0.00111761	0.0948739	0.0102332	0.0102332	0.000104718	-0.0790366	-0.0376776	-0.0238073	-0.163385
508	61	18.4	0.499	1	-0.0424993	-0.00122502	0.0964544	-0.0412743	0.0412743	0.00170357	-0.0914753	-0.0522316	-0.0255244	-0.134782
509	61	18.4	0.499	1	-0.0458827	-0.00122502	0.0964544	-0.0446577	0.0446577	0.00199431	-0.0914753	-0.0522316	-0.0255244	-0.134782
510	61	18.4	0.499	1	-0.0380491	-0.00122502	0.0964544	-0.036824	0.036824	0.00135601	-0.0914753	-0.0522316	-0.0255244	-0.134782
511	61	18.4	0.499	3	0.0183717	0.00655817	0.102486	0.0118136	0.0118136	0.00013956	-0.121457	-0.0740765	-0.0299342	-0.0707622
512	61	18.4	0.499	3	0.0166648	0.00655817	0.102486	0.0101066	0.0101066	0.000102144	-0.121457	-0.0740765	-0.0299342	-0.0707622
513	61	18.4	0.499	3	0.00689046	0.00655817	0.102486	0.000332289	0.000332289	1.10416e-07	-0.121457	-0.0740765	-0.0299342	-0.0707622
514	61	18.4	0.499	6	0.027892	0.0374473	0.100691	-0.00955523	0.00955523	9.13024e-05	-0.158154	-0.077268	-0.03584	0.00592047
515	61	18.4	0.499	6	0.0206375	0.0374473	0.100691	-0.0168098	0.0168098	0.000282568	-0.158154	-0.077268	-0.03584	0.00592047
516	61	18.4	0.499	6	0.0557621	0.0374473	0.100691	0.0183148	0.0183148	0.000335432	-0.158154	-0.077268	-0.03584	0.00592047
517	61	18.4	0.499	9	0.0855118	0.080414	0.100404	0.00509778	0.00509778	2.59874e-05	-0.175418	-0.0723324	-0.0383761	0.0637518
518	61	18.4	0.499	9	0.089393	0.080414	0.100404	0.00897906	0.00897906	8.06235e-05	-0.175418	-0.0723324	-0.0383761	0.0637518
519	61	18.4	0.499	9	0.0687369	0.080414	0.100404	-0.0116771	0.0116771	0.000136354	-0.175418	-0.0723324	-0.0383761	0.0637518
520	61	18.4	0.499	12	0.112142	0.109398	0.100404	0.00274411	0.00274411	7.53014e-06	-0.179695	-0.0796046	-0.0397086	0.105618
521	61	18.4	0.499	12	0.131488	0.109398	0.100404	0.0220895	0.0220895	0.000487948	-0.179695	-0.0796046	-0.0397086	0.105618
522	61	18.4	0.499	12	0.106402	0.109398	0.100404	-0.00299652	0.00299652	8.97916e-06	-0.179695	-0.0796046	-0.0397086	0.105618
523	61	18.4	0.499	15	0.175574	0.133588	0.100717	0.0419859	0.0419859	0.00176282	-0.178774	-0.0888531	-0.0397018	0.138128
524	61	18.4	0.499	15	0.102561	0.133588	0.100717	-0.0310268	0.0310268	0.000962664	-0.178774	-0.0888531	-0.0397018	0.138128
525	61	18.4	0.499	15	0.0849021	0.133588	0.100717	-0.0486856	0.0486856	0.00237029	-0.178774	-0.0888531	-0.0397018	0.138128
526	61	18.4	0.499	18	0.20197	0.189625	0.1032	0.0123457	0.0123457	0.000152416	-0.168396	-0.0817081	-0.0331016	0.170042
527	61	18.4	0.499	18	0.203535	0.189625	0.1032	0.0139104	0.0139104	0.000193499	-0.168396	-0.0817081	-0.0331016	0.170042
528	61	18.4	0.499	18	0.195122	0.189625	0.1032	0.00549756	0.00549756	3.02231e-05	-0.168396	-0.0817081	-0.0331016	0.170042
529	61	18.4	0.499	21	0.298992	0.237859	0.10327	0.061133	0.061133	0.00373725	-0.159777	-0.0691373	-0.025563	0.189548
530	61	18.4	0.499	21	0.191698	0.237859	0.10327	-0.046161	0.046161	0.00213084	-0.159777	-0.0691373	-0.025563	0.189548
531	61	18.4	0.499	21	0.217607	0.237859	0.10327	-0.0202519	0.0202519	0.00041014	-0.159777	-0.0691373	-0.025563	0.189548
532	61	18.4	0.499	28	0.359416	0.306317	0.12646	0.053099	0.053099	0.0028195	-0.147422	-0.0801006	-0.0052158	0.236267
533	61	18.4	0.499	28	0.305241	0.306317	0.12646	-0.00107639	0.00107639	1.15861e-06	-0.147422	-0.0801006	-0.0052158	0.236267
534	61	18.4	0.499	28	0.296706	0.306317	0.12646	-0.00961114	0.00961114	9.23739e-05	-0.147422	-0.0801006	-0.0052158	0.236267
535	61	18.4	0.499	35	0.507352	0.333733	0.372102	0.173619	0.173619	0.0301434	-0.127147	-0.123805	0.0138553	0.268042
536	61	18.4	0.499	35	0.468234	0.333733	0.372102	0.134501	0.134501	0.0180905	-0.127147	-0.123805	0.0138553	0.268042
537	61	18.4	0.499	35	0.392326	0.333733	0.372102	0.0585926	0.0585926	0.00343309	-0.127147	-0.123805	0.0138553	0.268042
538	61	27.7	0.876	0	0.024703	-0.00538454	0.0944953	0.0300875	0.0300875	0.000905258	-0.0669132	-0.0683588	-0.009997	-0.162904
539	61	27.7	0.876	0	0.0223721	-0.00538454	0.0944953	0.0277566	0.0277566	0.00077043	-0.0669132	-0.0683588	-0.009997	-0.162904
540	61	27.7	0.876	0	-0.00140088	-0.00538454	0.0944953	0.00398366	0.00398366	1.58695e-05	-0.0669132	-0.0683588	-0.009997	-0.162904
541	61	27.7	0.876	0	-0.00965482	-0.00538454	0.0944953	-0.00427029	0.00427029	1.82353e-05	-0.0669132	-0.0683588	-0.009997	-0.162904
542	61	27.7	0.876	0	-0.0342048	-0.00538454	0.0944953	-0.0288202	0.0288202	0.000830605	-0.0669132	-0.0683588	-0.009997	-0.162904
543	61	27.7	0.876	0	-0.00181459	-0.00538454	0.0944953	0.00356995	0.00356995	1.27445e-05	-0.0669132	-0.0683588	-0.009997	-0.162904
544	61	27.7	0.876	0.0833333	0.0104755	-0.00585773	0.0942218	0.0163332	0.0163332	0.000266775	-0.0678794	-0.0702243	-0.0101271	-0.160415
545	61	27.7	0.876	0.0833333	0.0131696	-0.00585773	0.0942218	0.0190274	0.0190274	0.000362041	-0.0678794	-0.0702243	-0.0101271	-0.160415
546	61	27.7	0.876	0.0833333	-0.027313	-0.00585773	0.0942218	-0.0214553	0.0214553	0.000460329	-0.0678794	-0.0702243	-0.0101271	-0.160415
547	61	27.7	0.876	0.166667	0.0179929	-0.00631411	0.0940241	0.024307	0.024307	0.000590828	-0.0688482	-0.0720756	-0.0102569	-0.157922
548	61	27.7	0.876	0.166667	-0.00731385	-0.00631411	0.0940241	-0.000999747	0.000999747	9.99495e-07	-0.0688482	-0.0720756	-0.0102569	-0.157922
549	61	27.7	0.876	0.166667	-0.0237007	-0.00631411	0.0940241	-0.0173865	0.0173865	0.000302292	-0.0688482	-0.0720756	-0.0102569	-0.157922
550	61	27.7	0.876	1	-0.0377868	-0.00964385	0.0948389	-0.028143	0.028143	0.000792028	-0.0785281	-0.0895364	-0.0114476	-0.13292
551	61	27.7	0.876	1	-0.0435182	-0.00964385	0.0948389	-0.0338743	0.0338743	0.00114747	-0.0785281	-0.0895364	-0.0114476	-0.13292
552	61	27.7	0.876	1	-0.0249418	-0.00964385	0.0948389	-0.0152979	0.0152979	0.000234026	-0.0785281	-0.0895364	-0.0114476	-0.13292
553	61	27.7	0.876	3	-0.00840362	-0.00628458	0.0998172	-0.00211903	0.00211903	4.4903e-06	-0.0994346	-0.120726	-0.0124787	-0.0764339
554	61	27.7	0.876	3	0.0200513	-0.00628458	0.0998172	0.0263359	0.0263359	0.000693578	-0.0994346	-0.120726	-0.0124787	-0.0764339
555	61	27.7	0.876	3	-0.000169855	-0.00628458	0.0998172	0.00611473	0.00611473	3.73899e-05	-0.0994346	-0.120726	-0.0124787	-0.0764339
556	61	27.7	0.876	6	0.0200917	0.013759	0.102794	0.0063327	0.0063327	4.01031e-05	-0.122192	-0.145843	-0.0104655	-0.0105286
557	61	27.7	0.876	6	-0.00249065	0.013759	0.102794	-0.0162496	0.0162496	0.00026405	-0.122192	-0.145843	-0.0104655	-0.0105286
558	61	27.7	0.876	6	-0.00255119	0.013759	0.102794	-0.0163101	0.0163101	0.000266021	-0.122192	-0.145843	-0.0104655	-0.0105286
559	61	27.7	0.876	9	0.0700088	0.0400952	0.100698	0.0299136	0.0299136	0.000894826	-0.134958	-0.158306	-0.0074109	0.0379818
560	61	27.7	0.876	9	0.0447122	0.0400952	0.100698	0.00461703	0.00461703	2.1317e-05	-0.134958	-0.158306	-0.0074109	0.0379818
561	61	27.7	0.876	9	0.0216254	0.0400952	0.100698	-0.0184698	0.0184698	0.000341133	-0.134958	-0.158306	-0.0074109	0.0379818
562	61	27.7	0.876	12	0.0741863	0.0756616	0.100447	-0.0014753	0.0014753	2.17652e-06	-0.139414	-0.162547	-0.0057048	0.0805386
563	61	27.7	0.876	12	0.044692	0.0756616	0.100447	-0.0309695	0.0309695	0.000959111	-0.139414	-0.162547	-0.0057048	0.0805386
564	61	27.7	0.876	12	0.0828236	0.0756616	0.100447	0.00716207	0.00716207	5.12953e-05	-0.139414	-0.162547	-0.0057048	0.0805386
565	61	27.7	0.876	15	0.121329	0.133575	0.101298	-0.0122468	0.0122468	0.000149985	-0.135097	-0.155148	-0.00175	0.122782
566	61	27.7	0.876	15	0.180246	0.133575	0.101298	0.046671	0.046671	0.00217818	-0.135097	-0.155148	-0.00175	0.122782
567	61	27.7	0.876	15	0.116384	0.133575	0.101298	-0.0171911	0.0171911	0.000295535	-0.135097	-0.155148	-0.00175	0.122782
568	61	27.7	0.876	18	0.178006	0.180426	0.107661	-0.00241956	0.00241956	5.85429e-06	-0.128116	-0.144814	0.00132241	0.149245
569	61	27.7	0.876	18	0.190085	0.180426	0.107661	0.00965864	0.00965864	9.32893e-05	-0.128116	-0.144814	0.00132241	0.149245
570	61	27.7	0.876	18	0.138866	0.180426	0.107661	-0.0415602	0.0415602	0.00172725	-0.128116	-0.144814	0.00132241	0.149245
571	61	27.7	0.876	21	0.215169	0.212274	0.103526	0.00289526	0.00289526	8.38253e-06	-0.119752	-0.134634	0.00334564	0.160526
572	61	27.7	0.876	21	0.192163	0.212274	0.103526	-0.0201108	0.0201108	0.000404446	-0.119752	-0.134634	0.00334564	0.160526
573	61	27.7	0.876	21	0.230002	0.212274	0.103526	0.0177281	0.0177281	0.000314287	-0.119752	-0.134634	0.00334564	0.160526
574	61	27.7	0.876	28	0.362176	0.371282	0.124894	-0.00910599	0.00910599	8.29191e-05	-0.071286	-0.107053	0.016732	0.230101
575	61	27.7	0.876	28	0.263775	0.371282	0.124894	-0.107508	0.107508	0.0115579	-0.071286	-0.107053	0.016732	0.230101
576	61	27.7	0.876	28	0.240506	0.371282	0.124894	-0.130776	0.130776	0.0171023	-0.071286	-0.107053	0.016732	0.230101
577	61	27.7	0.876	35	0.772038	0.647208	0.110887	0.12483	0.12483	0.0155825	0.00386263	-0.0440864	0.0428038	0.341839
578	61	27.7	0.876	35	0.543571	0.647208	0.110887	-0.103637	0.103637	0.0107406	0.00386263	-0.0440864	0.0428038	0.341839
579	61	27.7	0.876	35	0.36376	0.647208	0.110887	-0.283448	0.283448	0.0803425	0.00386263	-0.0440864	0.0428038	0.341839
580	31	9.49	1.215	0	-0.0568422	0.0350705	0.0960656	-0.0919126	0.0919126	0.00844793	0.0320922	-0.0068769	-0.0042118	-0.288722
581	31	9.49	1.215	0	0.0845222	0.0350705	0.0960656	0.0494518	0.0494518	0.00244548	0.0320922	-0.0068769	-0.0042118	-0.288722
582	31	9.49	1.215	0	0.129383	0.0350705	0.0960656	0.0943128	0.0943128	0.0088949	0.0320922	-0.0068769	-0.0042118	-0.288722
583	31	9.49	1.215	0	-0.0379609	0.0350705	0.0960656	-0.0730314	0.0730314	0.00533358	0.0320922	-0.0068769	-0.0042118	-0.288722
584	31	9.49	1.215	0	-0.0382325	0.0350705	0.0960656	-0.073303	0.073303	0.00537333	0.0320922	-0.0068769	-0.0042118	-0.288722
585	31	9.49	1.215	0	-0.0808698	0.0350705	0.0960656	-0.11594	0.11594	0.0134422	0.0320922	-0.0068769	-0.0042118	-0.288722
586	31	9.49	1.215	0.166667	0.140464	0.055723	0.0954626	0.0847411	0.0847411	0.00718105	0.0356392	-0.0051525	-0.0023036	-0.275249
587	31	9.49	1.215	0.166667	0.0440548	0.055723	0.0954626	-0.0116682	0.0116682	0.000136146	0.0356392	-0.0051525	-0.0023036	-0.275249
588	31	9.49	1.215	0.166667	0.0864206	0.055723	0.0954626	0.0306976	0.0306976	0.000942343	0.0356392	-0.0051525	-0.0023036	-0.275249
589	31	9.49	1.215	1	0.160289	0.165925	0.0960746	-0.00563607	0.00563607	3.17653e-05	0.0558978	0.00438397	0.00853999	-0.205685
590	31	9.49	1.215	1	0.103258	0.165925	0.0960746	-0.0626669	0.0626669	0.00392714	0.0558978	0.00438397	0.00853999	-0.205685
591	31	9.49	1.215	1	0.199124	0.165925	0.0960746	0.0331992	0.0331992	0.00110219	0.0558978	0.00438397	0.00853999	-0.205685
592	31	9.49	1.215	3	0.411496	0.45476	0.100161	-0.0432635	0.0432635	0.00187173	0.11505	0.0319642	0.0412692	-0.0363126
593	31	9.49	1.215	3	0.409595	0.45476	0.100161	-0.0451646	0.0451646	0.00203984	0.11505	0.0319642	0.0412692	-0.0363126
594	31	9.49	1.215	3	0.480476	0.45476	0.100161	0.0257166	0.0257166	0.000661344	0.11505	0.0319642	0.0412692	-0.0363126
595	31	9.49	1.215	5	0.574713	0.711261	0.0989752	-0.136548	0.136548	0.0186455	0.166361	0.0588642	0.0729826	0.110265
596	31	9.49	1.215	5	0.90685	0.711261	0.0989752	0.195588	0.195588	0.0382548	0.166361	0.0588642	0.0729826	0.110265
597	31	9.49	1.215	5	0.74662	0.711261	0.0989752	0.0353588	0.0353588	0.00125025	0.166361	0.0588642	0.0729826	0.110265
598	31	9.49	1.215	7	0.823321	0.873615	0.105053	-0.0502943	0.0502943	0.00252951	0.191266	0.0756037	0.0914981	0.212458
599	31	9.49	1.215	7	0.897315	0.873615	0.105053	0.0237003	0.0237003	0.000561705	0.191266	0.0756037	0.0914981	0.212458
600	31	9.49	1.215	7	0.983334	0.873615	0.105053	0.109719	0.109719	0.0120382	0.191266	0.0756037	0.0914981	0.212458
601	31	9.49	1.215	14	0.970188	0.99609	0.110282	-0.0259015	0.0259015	0.000670887	0.206912	0.0738407	0.0898429	0.322706
602	31	9.49	1.215	14	0.990271	0.99609	0.110282	-0.00581835	0.00581835	3.38532e-05	0.206912	0.0738407	0.0898429	0.322706
603	31	9.49	1.215	14	0.999218	0.99609	0.110282	0.00312777	0.00312777	9.78293e-06	0.206912	0.0738407	0.0898429	0.322706
604	31	9.49	1.215	21	0.96685	0.967194	0.104794	-0.000344449	0.000344449	1.18645e-07	0.200053	0.0698203	0.0873837	0.307148
605	31	9.49	1.215	21	0.96998	0.967194	0.104794	0.00278539	0.00278539	7.7584e-06	0.200053	0.0698203	0.0873837	0.307148
606	31	9.49	1.215	21	0.985133	0.967194	0.104794	0.017939	0.017939	0.000321809	0.200053	0.0698203	0.0873837	0.307148
607	43.5	8.05	2.57	0	-0.0323238	0.0533901	0.096436	-0.0857139	0.0857139	0.00734687	0.039205	-0.0186355	0.00767829	-0.277646
608	43.5	8.05	2.57	0	-0.00159692	0.0533901	0.096436	-0.054987	0.054987	0.00302357	0.039205	-0.0186355	0.00767829	-0.277646
609	43.5	8.05	2.57	0	-0.0663546	0.0533901	0.096436	-0.119745	0.119745	0.0143388	0.039205	-0.0186355	0.00767829	-0.277646
610	43.5	8.05	2.57	0	-0.117566	0.0533901	0.096436	-0.170956	0.170956	0.029226	0.039205	-0.0186355	0.00767829	-0.277646
611	43.5	8.05	2.57	0	0.0129405	0.0533901	0.096436	-0.0404496	0.0404496	0.00163617	0.039205	-0.0186355	0.00767829	-0.277646
612	43.5	8.05	2.57	0	0.176817	0.0533901	0.096436	0.123427	0.123427	0.0152342	0.039205	-0.0186355	0.00767829	-0.277646
613	43.5	8.05	2.57	0.166667	0.0654736	0.0670843	0.0956137	-0.00161072	0.00161072	2.59441e-06	0.0417794	-0.0176951	0.00435926	-0.264148
614	43.5	8.05	2.57	0.166667	0.0363987	0.0670843	0.0956137	-0.0306856	0.0306856	0.000941606	0.0417794	-0.0176951	0.00435926	-0.264148
615	43.5	8.05	2.57	0.166667	0.0446586	0.0670843	0.0956137	-0.0224257	0.0224257	0.000502912	0.0417794	-0.0176951	0.00435926	-0.264148
616	43.5	8.05	2.57	1	0.215474	0.134574	0.0945857	0.0808997	0.0808997	0.00654477	0.0540928	-0.0132764	-0.0122434	-0.196788
617	43.5	8.05	2.57	1	0.177478	0.134574	0.0945857	0.0429041	0.0429041	0.00184076	0.0540928	-0.0132764	-0.0122434	-0.196788
618	43.5	8.05	2.57	1	0.0938877	0.134574	0.0945857	-0.0406862	0.0406862	0.00165536	0.0540928	-0.0132764	-0.0122434	-0.196788
619	43.5	8.05	2.57	2	0.178139	0.206956	0.0959283	-0.0288175	0.0288175	0.000830449	0.0661547	-0.0092991	-0.0325843	-0.120104
620	43.5	8.05	2.57	2	0.218117	0.206956	0.0959283	0.0111605	0.0111605	0.000124556	0.0661547	-0.0092991	-0.0325843	-0.120104
621	43.5	8.05	2.57	2	0.248844	0.206956	0.0959283	0.0418873	0.0418873	0.00175455	0.0661547	-0.0092991	-0.0325843	-0.120104
622	43.5	8.05	2.57	3	0.296751	0.262539	0.0972603	0.0342125	0.0342125	0.00117049	0.0735936	-0.0075927	-0.0538226	-0.0524282
623	43.5	8.05	2.57	3	0.191355	0.262539	0.0972603	-0.071184	0.071184	0.00506716	0.0735936	-0.0075927	-0.0538226	-0.0524282
624	43.5	8.05	2.57	3	0.246861	0.262539	0.0972603	-0.0156774	0.0156774	0.000245781	0.0735936	-0.0075927	-0.0538226	-0.0524282
625	43.5	8.05	2.57	5	0.361178	0.318197	0.0994009	0.0429818	0.0429818	0.00184743	0.0745556	-0.0116463	-0.0968454	0.049344
626	43.5	8.05	2.57	5	0.190694	0.318197	0.0994009	-0.127503	0.127503	0.016257	0.0745556	-0.0116463	-0.0968454	0.049344
627	43.5	8.05	2.57	5	0.453029	0.318197	0.0994009	0.134832	0.134832	0.0181797	0.0745556	-0.0116463	-0.0968454	0.049344
628	43.5	8.05	2.57	7	0.381002	0.34498	0.103513	0.0360218	0.0360218	0.00129757	0.0698836	-0.0196068	-0.126136	0.118051
629	43.5	8.05	2.57	7	0.414703	0.34498	0.103513	0.0697222	0.0697222	0.00486119	0.0698836	-0.0196068	-0.126136	0.118051
630	43.5	8.05	2.57	7	0.286839	0.34498	0.103513	-0.0581412	0.0581412	0.0033804	0.0698836	-0.0196068	-0.126136	0.118051
631	43.5	8.05	2.57	10	0.555121	0.515391	0.102057	0.0397304	0.0397304	0.00157851	0.0966812	-0.011769	-0.0955473	0.223237
632	43.5	8.05	2.57	10	0.324835	0.515391	0.102057	-0.190556	0.190556	0.0363116	0.0966812	-0.011769	-0.0955473	0.223237
633	43.5	8.05	2.57	10	0.578579	0.515391	0.102057	0.0631886	0.0631886	0.0039928	0.0966812	-0.011769	-0.0955473	0.223237
634	43.5	8.05	2.57	14	0.956107	0.924191	0.101942	0.0319157	0.0319157	0.00101861	0.174077	0.0307643	0.0395797	0.376982
635	43.5	8.05	2.57	14	0.966845	0.924191	0.101942	0.0426535	0.0426535	0.00181932	0.174077	0.0307643	0.0395797	0.376982
636	43.5	8.05	2.57	14	0.975006	0.924191	0.101942	0.0508143	0.0508143	0.0025821	0.174077	0.0307643	0.0395797	0.376982
637	43.5	8.05	2.57	17	0.961063	0.986495	0.103803	-0.0254319	0.0254319	0.000646779	0.174948	0.0359486	0.0793421	0.393467
638	43.5	8.05	2.57	17	0.973717	0.986495	0.103803	-0.0127777	0.0127777	0.000163269	0.174948	0.0359486	0.0793421	0.393467
639	43.5	8.05	2.57	17	0.985347	0.986495	0.103803	-0.00114772	0.00114772	1.31725e-06	0.174948	0.0359486	0.0793421	0.393467
640	49	8.4	1.80507	0	-0.108912	0.0448623	0.0964437	-0.153774	0.153774	0.0236465	0.0213909	-0.0312767	0.0089152	-0.256956
641	49	8.4	1.80507	0	-0.0305699	0.0448623	0.0964437	-0.0754322	0.0754322	0.00569002	0.0213909	-0.0312767	0.0089152	-0.256956
642	49	8.4	1.80507	0	-0.0510881	0.0448623	0.0964437	-0.0959504	0.0959504	0.00920647	0.0213909	-0.0312767	0.0089152	-0.256956
643	49	8.4	1.80507	0	0.0881865	0.0448623	0.0964437	0.0433243	0.0433243	0.00187699	0.0213909	-0.0312767	0.0089152	-0.256956
644	49	8.4	1.80507	0	0.0829016	0.0448623	0.0964437	0.0380393	0.0380393	0.00144699	0.0213909	-0.0312767	0.0089152	-0.256956
645	49	8.4	1.80507	0	0.0194819	0.0448623	0.0964437	-0.0253804	0.0253804	0.000644165	0.0213909	-0.0312767	0.0089152	-0.256956
646	49	8.4	1.80507	0.166667	0.146943	0.0562961	0.0958513	0.0906469	0.0906469	0.00821686	0.0225481	-0.0317986	0.00822026	-0.245462
647	49	8.4	1.80507	0.166667	0.126736	0.0562961	0.0958513	0.0704396	0.0704396	0.00496174	0.0225481	-0.0317986	0.00822026	-0.245462
648	49	8.4	1.80507	0.166667	0.145389	0.0562961	0.0958513	0.0890925	0.0890925	0.00793747	0.0225481	-0.0317986	0.00822026	-0.245462
649	49	8.4	1.80507	1	0.181451	0.111049	0.0959257	0.0704022	0.0704022	0.00495647	0.0273001	-0.035302	0.00515348	-0.188892
650	49	8.4	1.80507	1	0.136995	0.111049	0.0959257	0.0259462	0.0259462	0.000673206	0.0273001	-0.035302	0.00515348	-0.188892
651	49	8.4	1.80507	3	0.127358	0.216546	0.100644	-0.0891887	0.0891887	0.00795462	0.0313205	-0.0485649	-0.0011382	-0.0678597
652	49	8.4	1.80507	3	0.28715	0.216546	0.100644	0.0706041	0.0706041	0.00498494	0.0313205	-0.0485649	-0.0011382	-0.0678597
653	49	8.4	1.80507	3	0.209119	0.216546	0.100644	-0.00742699	0.00742699	5.51602e-05	0.0313205	-0.0485649	-0.0011382	-0.0678597
654	49	8.4	1.80507	7	0.287772	0.330127	0.103369	-0.0423553	0.0423553	0.00179397	0.0280321	-0.076511	-0.0175152	0.0933329
655	49	8.4	1.80507	7	0.273782	0.330127	0.103369	-0.0563449	0.0563449	0.00317475	0.0280321	-0.076511	-0.0175152	0.0933329
656	49	8.4	1.80507	7	0.370777	0.330127	0.103369	0.0406499	0.0406499	0.00165241	0.0280321	-0.076511	-0.0175152	0.0933329
657	49	8.4	1.80507	14	0.464974	0.444644	0.110251	0.02033	0.02033	0.00041331	0.0336827	-0.0968151	-0.0030744	0.208062
658	49	8.4	1.80507	14	0.385389	0.444644	0.110251	-0.0592555	0.0592555	0.00351121	0.0336827	-0.0968151	-0.0030744	0.208062
659	49	8.4	1.80507	14	0.316373	0.444644	0.110251	-0.128271	0.128271	0.0164535	0.0336827	-0.0968151	-0.0030744	0.208062
660	49	8.4	1.80507	21	0.584041	0.6829	0.23461	-0.0988586	0.0988586	0.00977302	0.103035	-0.0642535	0.0461145	0.295215
661	49	8.4	1.80507	21	0.740415	0.6829	0.23461	0.0575145	0.0575145	0.00330792	0.103035	-0.0642535	0.0461145	0.295215
662	49	8.4	1.80507	21	0.790155	0.6829	0.23461	0.107255	0.107255	0.0115037	0.103035	-0.0642535	0.0461145	0.295215
663	49	8.4	1.80507	28	0.868808	0.796197	0.104734	0.0726112	0.0726112	0.00527239	0.14948	-0.0221472	0.0421751	0.323901
664	49	8.4	1.80507	28	0.759378	0.796197	0.104734	-0.0368189	0.0368189	0.00135563	0.14948	-0.0221472	0.0421751	0.323901
665	49	8.4	1.80507	28	0.757824	0.796197	0.104734	-0.0383733	0.0383733	0.00147251	0.14948	-0.0221472	0.0421751	0.323901
666	59	8.38	0.375	0	0.0757361	-0.0131809	0.0989064	0.088917	0.088917	0.00790623	-0.0630435	-0.0332552	-0.0495383	-0.170132
667	59	8.38	0.375	0	0.0133837	-0.0131809	0.0989064	0.0265646	0.0265646	0.000705677	-0.0630435	-0.0332552	-0.0495383	-0.170132
668	59	8.38	0.375	0	-0.00740041	-0.0131809	0.0989064	0.00578045	0.00578045	3.34136e-05	-0.0630435	-0.0332552	-0.0495383	-0.170132
669	59	8.38	0.375	0	-0.0392064	-0.0131809	0.0989064	-0.0260256	0.0260256	0.00067733	-0.0630435	-0.0332552	-0.0495383	-0.170132
670	59	8.38	0.375	0	-0.0499134	-0.0131809	0.0989064	-0.0367325	0.0367325	0.00134928	-0.0630435	-0.0332552	-0.0495383	-0.170132
671	59	8.38	0.375	0	0.00740041	-0.0131809	0.0989064	0.0205813	0.0205813	0.000423589	-0.0630435	-0.0332552	-0.0495383	-0.170132
672	59	8.38	0.375	1	0.0688081	0.0248234	0.100155	0.0439846	0.0439846	0.00193465	-0.0713528	-0.0372262	-0.0518247	-0.117561
673	59	8.38	0.375	1	-0.0489687	0.0248234	0.100155	-0.0737921	0.0737921	0.00544527	-0.0713528	-0.0372262	-0.0518247	-0.117561
674	59	8.38	0.375	1	0.0316486	0.0248234	0.100155	0.00682514	0.00682514	4.65826e-05	-0.0713528	-0.0372262	-0.0518247	-0.117561
675	59	8.38	0.375	7	0.158873	0.0875343	0.108324	0.0713384	0.0713384	0.00508916	-0.13498	-0.0468439	-0.084825	0.0513941
676	59	8.38	0.375	7	0.0307038	0.0875343	0.108324	-0.0568304	0.0568304	0.0032297	-0.13498	-0.0468439	-0.084825	0.0513941
677	59	8.38	0.375	14	0.126122	0.0946731	0.103684	0.0314487	0.0314487	0.000989023	-0.158497	-0.0724179	-0.095828	0.118627
678	59	8.38	0.375	14	0.110376	0.0946731	0.103684	0.0157032	0.0157032	0.00024659	-0.158497	-0.0724179	-0.095828	0.118627
679	59	8.38	0.375	14	0.0354275	0.0946731	0.103684	-0.0592456	0.0592456	0.00351005	-0.158497	-0.0724179	-0.095828	0.118627
680	59	8.38	0.375	21	0.209573	0.0949936	0.108713	0.11458	0.11458	0.0131285	-0.175471	-0.0856697	-0.0787058	0.132052
681	59	8.38	0.375	21	0.145331	0.0949936	0.108713	0.0503378	0.0503378	0.0025339	-0.175471	-0.0856697	-0.0787058	0.132052
682	59	8.38	0.375	21	0.0439301	0.0949936	0.108713	-0.0510635	0.0510635	0.00260748	-0.175471	-0.0856697	-0.0787058	0.132052
683	59	8.38	0.375	28	0.23823	0.000111462	0.120471	0.238119	0.238119	0.0567005	-0.222487	-0.120959	-0.0754764	0.116245
684	59	8.38	0.375	28	-0.0782554	0.000111462	0.120471	-0.0783669	0.0783669	0.00614136	-0.222487	-0.120959	-0.0754764	0.116245
685	59	8.38	0.375	35	0.180916	0.21832	0.108936	-0.0374032	0.0374032	0.001399	-0.178558	-0.0958782	-0.0244352	0.214402
686	59	8.38	0.375	35	0.207684	0.21832	0.108936	-0.0106358	0.0106358	0.00011312	-0.178558	-0.0958782	-0.0244352	0.214402
687	59	8.38	0.375	35	0.164226	0.21832	0.108936	-0.0540935	0.0540935	0.00292611	-0.178558	-0.0958782	-0.0244352	0.214402
688	59	8.38	0.375	42	0.15163	0.18678	0.1043	-0.0351503	0.0351503	0.00123554	-0.169737	-0.0560998	-0.0268919	0.13672
689	59	8.38	0.375	42	0.265942	0.18678	0.1043	0.0791624	0.0791624	0.00626669	-0.169737	-0.0560998	-0.0268919	0.13672
690	59	8.38	0.375	42	0.112266	0.18678	0.1043	-0.0745142	0.0745142	0.00555236	-0.169737	-0.0560998	-0.0268919	0.13672
691	59	8.38	0.375	56	0.230987	0.225889	0.104254	0.00509855	0.00509855	2.59952e-05	-0.0985086	-0.0047691	-0.0379663	0.0643442
692	59	8.38	0.375	56	0.199496	0.225889	0.104254	-0.0263926	0.0263926	0.000696567	-0.0985086	-0.0047691	-0.0379663	0.0643442
693	59	8.38	0.375	56	0.212722	0.225889	0.104254	-0.0131663	0.0131663	0.000173351	-0.0985086	-0.0047691	-0.0379663	0.0643442
694	59	8.38	0.375	63	0.234766	0.271921	0.109983	-0.0371552	0.0371552	0.00138051	-0.0426938	0.00595803	-0.0444926	0.0503611
695	59	8.38	0.375	63	0.299638	0.271921	0.109983	0.0277165	0.0277165	0.000768203	-0.0426938	0.00595803	-0.0444926	0.0503611
696	59	8.38	0.375	63	0.11573	0.271921	0.109983	-0.156192	0.156192	0.0243958	-0.0426938	0.00595803	-0.0444926	0.0503611
697	60	8.88	0.901	0	-0.0892451	0.0473362	0.0972303	-0.136581	0.136581	0.0186544	-0.0506586	-0.0200117	-0.0118905	-0.172892
698	60	8.88	0.901	0	0.0942576	0.0473362	0.0972303	0.0469214	0.0469214	0.00220162	-0.0506586	-0.0200117	-0.0118905	-0.172892
699	60	8.88	0.901	0	-0.0233314	0.0473362	0.0972303	-0.0706676	0.0706676	0.00499391	-0.0506586	-0.0200117	-0.0118905	-0.172892
700	60	8.88	0.901	0	0.122746	0.0473362	0.0972303	0.0754102	0.0754102	0.00568669	-0.0506586	-0.0200117	-0.0118905	-0.172892
701	60	8.88	0.901	0	-0.156248	0.0473362	0.0972303	-0.203584	0.203584	0.0414464	-0.0506586	-0.0200117	-0.0118905	-0.172892
702	60	8.88	0.901	0	0.117616	0.0473362	0.0972303	0.0702793	0.0702793	0.00493918	-0.0506586	-0.0200117	-0.0118905	-0.172892
703	60	8.88	0.901	0.166667	0.0447339	0.0516805	0.0963739	-0.00694657	0.00694657	4.82548e-05	-0.0532091	-0.0209192	-0.0122639	-0.164716
704	60	8.88	0.901	0.166667	0.129389	0.0516805	0.0963739	0.0777085	0.0777085	0.00603862	-0.0532091	-0.0209192	-0.0122639	-0.164716
705	60	8.88	0.901	0.166667	0.107408	0.0516805	0.0963739	0.0557279	0.0557279	0.0031056	-0.0532091	-0.0209192	-0.0122639	-0.164716
706	60	8.88	0.901	1	0.045062	0.0699604	0.0950509	-0.0248984	0.0248984	0.000619931	-0.0668058	-0.0259726	-0.0145256	-0.125524
707	60	8.88	0.901	1	0.168806	0.0699604	0.0950509	0.0988451	0.0988451	0.00977036	-0.0668058	-0.0259726	-0.0145256	-0.125524
708	60	8.88	0.901	1	0.093654	0.0699604	0.0950509	0.0236936	0.0236936	0.000561385	-0.0668058	-0.0259726	-0.0145256	-0.125524
709	60	8.88	0.901	2	0.0554272	0.0846569	0.0970623	-0.0292297	0.0292297	0.000854376	-0.0845471	-0.0324609	-0.0175924	-0.0835313
710	60	8.88	0.901	2	0.0592886	0.0846569	0.0970623	-0.0253683	0.0253683	0.000643548	-0.0845471	-0.0324609	-0.0175924	-0.0835313
711	60	8.88	0.901	2	0.0904773	0.0846569	0.0970623	0.00582047	0.00582047	3.38779e-05	-0.0845471	-0.0324609	-0.0175924	-0.0835313
712	60	8.88	0.901	3	0.0996902	0.0951108	0.100968	0.00457942	0.00457942	2.0971e-05	-0.102688	-0.0379539	-0.0199812	-0.0470549
713	60	8.88	0.901	3	0.0990866	0.0951108	0.100968	0.00397579	0.00397579	1.58069e-05	-0.102688	-0.0379539	-0.0199812	-0.0470549
714	60	8.88	0.901	3	0.045062	0.0951108	0.100968	-0.0500488	0.0500488	0.00250489	-0.102688	-0.0379539	-0.0199812	-0.0470549
715	60	8.88	0.901	7	0.183594	0.144606	0.106112	0.0389881	0.0389881	0.00152008	-0.162362	-0.0424335	-0.0159666	0.0625794
716	60	8.88	0.901	7	0.133795	0.144606	0.106112	-0.0108111	0.0108111	0.00011688	-0.162362	-0.0424335	-0.0159666	0.0625794
717	60	8.88	0.901	7	0.151904	0.144606	0.106112	0.00729772	0.00729772	5.32568e-05	-0.162362	-0.0424335	-0.0159666	0.0625794
718	60	8.88	0.901	14	0.163373	0.182925	0.107507	-0.0195524	0.0195524	0.000382296	-0.176873	-0.0677215	-0.0182012	0.142932
719	60	8.88	0.901	14	0.198685	0.182925	0.107507	0.0157598	0.0157598	0.000248371	-0.176873	-0.0677215	-0.0182012	0.142932
720	60	8.88	0.901	14	0.231281	0.182925	0.107507	0.0483557	0.0483557	0.00233827	-0.176873	-0.0677215	-0.0182012	0.142932
721	60	8.88	0.901	21	0.099992	0.121416	0.107551	-0.0214239	0.0214239	0.000458983	-0.18839	-0.0969579	-0.0292058	0.133181
722	60	8.88	0.901	21	0.130475	0.121416	0.107551	0.00905928	0.00905928	8.20706e-05	-0.18839	-0.0969579	-0.0292058	0.133181
723	60	8.88	0.901	21	0.0728288	0.121416	0.107551	-0.0485871	0.0485871	0.00236071	-0.18839	-0.0969579	-0.0292058	0.133181
724	60	8.88	0.901	28	0.00730741	0.0875551	0.103567	-0.0802477	0.0802477	0.0064397	-0.200954	-0.123504	-0.0248928	0.134117
725	60	8.88	0.901	28	0.0696849	0.0875551	0.103567	-0.0178703	0.0178703	0.000319347	-0.200954	-0.123504	-0.0248928	0.134117
726	60	8.88	0.901	28	0.119587	0.0875551	0.103567	0.0320317	0.0320317	0.00102603	-0.200954	-0.123504	-0.0248928	0.134117
727	60	8.88	0.901	42	0.192955	0.17561	0.103863	0.0173443	0.0173443	0.000300824	-0.167481	-0.0683741	-0.0081587	0.116835
728	60	8.88	0.901	42	0.12731	0.17561	0.103863	-0.0483006	0.0483006	0.00233294	-0.167481	-0.0683741	-0.0081587	0.116835
729	60	8.88	0.901	42	0.17038	0.17561	0.103863	-0.00523042	0.00523042	2.73573e-05	-0.167481	-0.0683741	-0.0081587	0.116835
730	60	8.88	0.901	56	0.166518	0.236617	0.120144	-0.0700988	0.0700988	0.00491384	-0.0940316	-0.0201544	-0.0021368	0.0501514
731	60	8.88	0.901	56	0.221173	0.236617	0.120144	-0.0154442	0.0154442	0.000238524	-0.0940316	-0.0201544	-0.0021368	0.0501514
732	60	8.88	0.901	56	0.164736	0.236617	0.120144	-0.071881	0.071881	0.00516688	-0.0940316	-0.0201544	-0.0021368	0.0501514
733	60	8.88	0.901	70	0.274936	0.232696	0.110922	0.0422401	0.0422401	0.00178423	-0.0265781	-0.0061708	-0.0020918	-0.0352516
734	60	8.88	0.901	70	0.219391	0.232696	0.110922	-0.0133055	0.0133055	0.000177036	-0.0265781	-0.0061708	-0.0020918	-0.0352516
735	60	8.88	0.901	70	0.243154	0.232696	0.110922	0.0104573	0.0104573	0.000109356	-0.0265781	-0.0061708	-0.0020918	-0.0352516
736	45.5	10.1	4.828	0	-0.0427016	0.11541	0.0959642	-0.158111	0.158111	0.0249992	0.0964902	0.0216848	0.038886	-0.34444
737	45.5	10.1	4.828	0	0.0522496	0.11541	0.0959642	-0.0631601	0.0631601	0.0039892	0.0964902	0.0216848	0.038886	-0.34444
738	45.5	10.1	4.828	0	0.115081	0.11541	0.0959642	-0.000329075	0.000329075	1.08291e-07	0.0964902	0.0216848	0.038886	-0.34444
739	45.5	10.1	4.828	0	0.0167823	0.11541	0.0959642	-0.0986274	0.0986274	0.00972735	0.0964902	0.0216848	0.038886	-0.34444
740	45.5	10.1	4.828	0	-0.141411	0.11541	0.0959642	-0.256821	0.256821	0.0659568	0.0964902	0.0216848	0.038886	-0.34444
741	45.5	10.1	4.828	0.083	0.160707	0.14722	0.0955205	0.0134866	0.0134866	0.000181889	0.103332	0.025581	0.0453859	-0.329867
742	45.5	10.1	4.828	0.083	0.115081	0.14722	0.0955205	-0.0321393	0.0321393	0.00103293	0.103332	0.025581	0.0453859	-0.329867
743	45.5	10.1	4.828	0.25	0.224595	0.211449	0.0948301	0.0131453	0.0131453	0.000172798	0.117162	0.0334656	0.058503	-0.30047
744	45.5	10.1	4.828	0.25	0.184488	0.211449	0.0948301	-0.0269609	0.0269609	0.000726891	0.117162	0.0334656	0.058503	-0.30047
745	45.5	10.1	4.828	0.5	0.163643	0.307717	0.0942199	-0.144074	0.144074	0.0207574	0.137928	0.0453127	0.0781272	-0.25644
746	45.5	10.1	4.828	0.5	0.343797	0.307717	0.0942199	0.0360807	0.0360807	0.00130181	0.137928	0.0453127	0.0781272	-0.25644
747	45.5	10.1	4.828	0.5	0.320133	0.307717	0.0942199	0.0124163	0.0124163	0.000154163	0.137928	0.0453127	0.0781272	-0.25644
748	45.5	10.1	4.828	1	0.487134	0.497514	0.0940359	-0.0103793	0.0103793	0.00010773	0.178974	0.0686637	0.116552	-0.169465
749	45.5	10.1	4.828	1	0.783497	0.497514	0.0940359	0.285984	0.285984	0.0817866	0.178974	0.0686637	0.116552	-0.169465
750	45.5	10.1	4.828	1	0.633349	0.497514	0.0940359	0.135835	0.135835	0.0184511	0.178974	0.0686637	0.116552	-0.169465
751	45.5	10.1	4.828	1.5	0.907633	0.677969	0.094651	0.229663	0.229663	0.0527452	0.218098	0.0906506	0.152445	-0.0860134
752	45.5	10.1	4.828	1.5	0.887609	0.677969	0.094651	0.209639	0.209639	0.0439487	0.218098	0.0906506	0.152445	-0.0860134
753	45.5	10.1	4.828	1.5	0.89812	0.677969	0.094651	0.22015	0.22015	0.0484662	0.218098	0.0906506	0.152445	-0.0860134
754	45.5	10.1	4.828	2	0.928126	0.84338	0.0959294	0.0847464	0.0847464	0.00718195	0.254026	0.110401	0.184324	-0.0081607
755	45.5	10.1	4.828	2	0.949618	0.84338	0.0959294	0.106238	0.106238	0.0112865	0.254026	0.110401	0.184324	-0.0081607
756	45.5	10.1	4.828	2	0.95226	0.84338	0.0959294	0.108881	0.108881	0.011855	0.254026	0.110401	0.184324	-0.0081607
757	45.5	10.1	4.828	2.5	0.974868	0.990275	0.0983344	-0.0154075	0.0154075	0.000237391	0.286	0.127477	0.211232	0.0627777
758	45.5	10.1	4.828	2.5	0.96007	0.990275	0.0983344	-0.0302051	0.0302051	0.000912347	0.286	0.127477	0.211232	0.0627777
759	45.5	10.1	4.828	2.5	0.983617	0.990275	0.0983344	-0.00665813	0.00665813	4.43307e-05	0.286	0.127477	0.211232	0.0627777
760	45.5	10.1	4.828	3	0.992249	1.11743	0.102711	-0.125177	0.125177	0.0156693	0.313778	0.141857	0.232764	0.126238
761	45.5	10.1	4.828	3	0.998121	1.11743	0.102711	-0.119305	0.119305	0.0142337	0.313778	0.141857	0.232764	0.126238
762	51.6	7.82	2.186	0	0.04628	0.000382041	0.0962161	0.045898	0.045898	0.00210662	-0.0050685	-0.0253155	0.0370619	-0.309084
763	51.6	7.82	2.186	0	-0.00387965	0.000382041	0.0962161	-0.00426169	0.00426169	1.8162e-05	-0.0050685	-0.0253155	0.0370619	-0.309084
764	51.6	7.82	2.186	0	-0.0225608	0.000382041	0.0962161	-0.0229429	0.0229429	0.000526375	-0.0050685	-0.0253155	0.0370619	-0.309084
765	51.6	7.82	2.186	0	-0.0198395	0.000382041	0.0962161	-0.0202216	0.0202216	0.000408912	-0.0050685	-0.0253155	0.0370619	-0.309084
766	51.6	7.82	2.186	0	-0.000181319	0.000382041	0.0962161	-0.00056336	0.00056336	3.17374e-07	-0.0050685	-0.0253155	0.0370619	-0.309084
767	51.6	7.82	2.186	0	0.0168627	0.000382041	0.0962161	0.0164807	0.0164807	0.000271612	-0.0050685	-0.0253155	0.0370619	-0.309084
768	51.6	7.82	2.186	0	-0.00395276	0.000382041	0.0962161	-0.0043348	0.0043348	1.87905e-05	-0.0050685	-0.0253155	0.0370619	-0.309084
769	51.6	7.82	2.186	0	-0.013744	0.000382041	0.0962161	-0.014126	0.014126	0.000199545	-0.0050685	-0.0253155	0.0370619	-0.309084
770	51.6	7.82	2.186	0	-0.0538518	0.000382041	0.0962161	-0.0542339	0.0542339	0.00294131	-0.0050685	-0.0253155	0.0370619	-0.309084
771	51.6	7.82	2.186	0	0.0548672	0.000382041	0.0962161	0.0544852	0.0544852	0.00296863	-0.0050685	-0.0253155	0.0370619	-0.309084
772	51.6	7.82	2.186	1	0.103098	0.117906	0.0945613	-0.0148081	0.0148081	0.000219281	0.00660211	-0.0182602	0.0569972	-0.230221
773	51.6	7.82	2.186	1	0.232923	0.117906	0.0945613	0.115016	0.115016	0.0132288	0.00660211	-0.0182602	0.0569972	-0.230221
774	51.6	7.82	2.186	1	0.186868	0.117906	0.0945613	0.0689614	0.0689614	0.00475567	0.00660211	-0.0182602	0.0569972	-0.230221
775	51.6	7.82	2.186	2	0.106736	0.252235	0.0945746	-0.145499	0.145499	0.0211699	0.0218718	-0.0088602	0.0844026	-0.147968
776	51.6	7.82	2.186	2	0.0938655	0.252235	0.0945746	-0.15837	0.15837	0.0250809	0.0218718	-0.0088602	0.0844026	-0.147968
777	51.6	7.82	2.186	2	0.190213	0.252235	0.0945746	-0.0620218	0.0620218	0.0038467	0.0218718	-0.0088602	0.0844026	-0.147968
778	51.6	7.82	2.186	3	0.137921	0.397042	0.0943173	-0.259122	0.259122	0.0671441	0.0403252	0.00257256	0.117101	-0.0657445
779	51.6	7.82	2.186	3	0.188007	0.397042	0.0943173	-0.209036	0.209036	0.0436959	0.0403252	0.00257256	0.117101	-0.0657445
780	51.6	7.82	2.186	3	0.149983	0.397042	0.0943173	-0.24706	0.24706	0.0610386	0.0403252	0.00257256	0.117101	-0.0657445
781	51.6	7.82	2.186	3	0.591717	0.397042	0.0943173	0.194675	0.194675	0.0378983	0.0403252	0.00257256	0.117101	-0.0657445
782	51.6	7.82	2.186	3	0.657718	0.397042	0.0943173	0.260675	0.260675	0.0679515	0.0403252	0.00257256	0.117101	-0.0657445
783	51.6	7.82	2.186	3	0.780797	0.397042	0.0943173	0.383755	0.383755	0.147268	0.0403252	0.00257256	0.117101	-0.0657445
784	51.6	7.82	2.186	4	0.296784	0.536865	0.0945026	-0.240081	0.240081	0.0576389	0.0591904	0.0136946	0.150176	0.0110161
785	51.6	7.82	2.186	4	0.788084	0.536865	0.0945026	0.251219	0.251219	0.0631109	0.0591904	0.0136946	0.150176	0.0110161
786	51.6	7.82	2.186	4	0.587666	0.536865	0.0945026	0.0508008	0.0508008	0.00258072	0.0591904	0.0136946	0.150176	0.0110161
787	51.6	7.82	2.186	5	0.797261	0.655877	0.0950439	0.141384	0.141384	0.0199894	0.075273	0.0219873	0.1786	0.0772279
788	51.6	7.82	2.186	5	0.74156	0.655877	0.0950439	0.0856825	0.0856825	0.0073415	0.075273	0.0219873	0.1786	0.0772279
789	51.6	7.82	2.186	5	0.52064	0.655877	0.0950439	-0.135237	0.135237	0.018289	0.075273	0.0219873	0.1786	0.0772279
790	51.6	7.82	2.186	6	0.836552	0.745942	0.0954161	0.0906098	0.0906098	0.00821014	0.0867662	0.0263819	0.199574	0.130432
791	51.6	7.82	2.186	6	0.60164	0.745942	0.0954161	-0.144302	0.144302	0.0208231	0.0867662	0.0263819	0.199574	0.130432
792	51.6	7.82	2.186	7	0.882408	0.807198	0.0957069	0.0752108	0.0752108	0.00565666	0.0934301	0.0272904	0.212781	0.170908
793	51.6	7.82	2.186	7	0.823371	0.807198	0.0957069	0.0161732	0.0161732	0.000261572	0.0934301	0.0272904	0.212781	0.170908
794	51.6	7.82	2.186	7	0.749828	0.807198	0.0957069	-0.0573699	0.0573699	0.00329131	0.0934301	0.0272904	0.212781	0.170908
795	51.6	7.82	2.186	8	0.924515	0.844351	0.096729	0.0801644	0.0801644	0.00642633	0.0958453	0.0256705	0.219405	0.200641
796	51.6	7.82	2.186	8	0.67357	0.844351	0.096729	-0.170781	0.170781	0.0291662	0.0958453	0.0256705	0.219405	0.200641
797	51.6	7.82	2.186	8	0.949963	0.844351	0.096729	0.105612	0.105612	0.0111539	0.0958453	0.0256705	0.219405	0.200641
798	51.6	7.82	2.186	10	0.905472	0.876587	0.102316	0.0288851	0.0288851	0.000834352	0.0928855	0.0191301	0.2216	0.240183
799	51.6	7.82	2.186	10	0.874503	0.876587	0.102316	-0.00208419	0.00208419	4.34383e-06	0.0928855	0.0191301	0.2216	0.240183
800	51.6	7.82	2.186	10	0.83998	0.876587	0.102316	-0.0366074	0.0366074	0.0013401	0.0928855	0.0191301	0.2216	0.240183
801	51.6	7.82	2.186	14	0.953341	0.913649	0.10846	0.039691	0.039691	0.00157538	0.0871184	0.00669424	0.220287	0.296762
802	51.6	7.82	2.186	14	0.90627	0.913649	0.10846	-0.00737946	0.00737946	5.44565e-05	0.0871184	0.00669424	0.220287	0.296762
803	51.6	7.82	2.186	14	0.913885	0.913649	0.10846	0.000235947	0.000235947	5.56708e-08	0.0871184	0.00669424	0.220287	0.296762
804	51.6	7.82	2.186	21	0.910839	0.924143	0.104502	-0.0133042	0.0133042	0.000177002	0.112031	0.00020942	0.183947	0.325168
805	51.6	7.82	2.186	21	0.895971	0.924143	0.104502	-0.0281724	0.0281724	0.000793684	0.112031	0.00020942	0.183947	0.325168
806	51.6	7.82	2.186	21	0.962624	0.924143	0.104502	0.0384806	0.0384806	0.00148075	0.112031	0.00020942	0.183947	0.325168
807	51.6	7.82	2.186	28	0.927738	0.934471	0.104636	-0.00673256	0.00673256	4.53274e-05	0.144348	0.0274104	0.140784	0.319139
808	51.6	7.82	2.186	28	0.917222	0.934471	0.104636	-0.0172491	0.0172491	0.000297531	0.144348	0.0274104	0.140784	0.319139
809	51.6	7.82	2.186	28	0.980393	0.934471	0.104636	0.0459226	0.0459226	0.00210888	0.144348	0.0274104	0.140784	0.319139
810	66.3	7.79	5.463	0	-0.0298324	0.00983895	0.096936	-0.0396714	0.0396714	0.00157382	-0.0803744	-0.007174	-0.043577	-0.161824
811	66.3	7.79	5.463	0	0.0201962	0.00983895	0.096936	0.0103573	0.0103573	0.000107273	-0.0803744	-0.007174	-0.043577	-0.161824
812	66.3	7.79	5.463	0	0.00532095	0.00983895	0.096936	-0.004518	0.004518	2.04123e-05	-0.0803744	-0.007174	-0.043577	-0.161824
813	66.3	7.79	5.463	0	-0.0390242	0.00983895	0.096936	-0.0488632	0.0488632	0.00238761	-0.0803744	-0.007174	-0.043577	-0.161824
814	66.3	7.79	5.463	0	0.00609278	0.00983895	0.096936	-0.00374617	0.00374617	1.40338e-05	-0.0803744	-0.007174	-0.043577	-0.161824
815	66.3	7.79	5.463	0	0.0372467	0.00983895	0.096936	0.0274077	0.0274077	0.000751183	-0.0803744	-0.007174	-0.043577	-0.161824
816	66.3	7.79	5.463	1	0.0270725	0.0284785	0.0987317	-0.00140594	0.00140594	1.97668e-06	-0.106789	-0.0045195	-0.043388	-0.119613
817	66.3	7.79	5.463	1	-0.00450234	0.0284785	0.0987317	-0.0329808	0.0329808	0.00108774	-0.106789	-0.0045195	-0.043388	-0.119613
818	66.3	7.79	5.463	1	0.129936	0.0284785	0.0987317	0.101458	0.101458	0.0102937	-0.106789	-0.0045195	-0.043388	-0.119613
819	66.3	7.79	5.463	7	0.0156354	0.0338004	0.104341	-0.018165	0.018165	0.000329967	-0.223105	-0.0005862	-0.0763567	0.0310595
820	66.3	7.79	5.463	7	0.00665411	0.0338004	0.104341	-0.0271463	0.0271463	0.000736922	-0.223105	-0.0005862	-0.0763567	0.0310595
821	66.3	7.79	5.463	7	0.0667867	0.0338004	0.104341	0.0329863	0.0329863	0.0010881	-0.223105	-0.0005862	-0.0763567	0.0310595
822	66.3	7.79	5.463	14	0.0548584	0.0754006	0.10448	-0.0205422	0.0205422	0.00042198	-0.199739	0.00327868	-0.120494	0.0895666
823	66.3	7.79	5.463	14	0.0704354	0.0754006	0.10448	-0.00496522	0.00496522	2.46534e-05	-0.199739	0.00327868	-0.120494	0.0895666
824	66.3	7.79	5.463	14	0.104677	0.0754006	0.10448	0.029276	0.029276	0.000857083	-0.199739	0.00327868	-0.120494	0.0895666
825	66.3	7.79	5.463	21	0.0672077	0.116946	0.110245	-0.0497379	0.0497379	0.00247386	-0.142764	0.00589132	-0.143918	0.0949474
826	66.3	7.79	5.463	21	0.0818023	0.116946	0.110245	-0.0351433	0.0351433	0.00123505	-0.142764	0.00589132	-0.143918	0.0949474
827	66.3	7.79	5.463	21	0.153302	0.116946	0.110245	0.0363562	0.0363562	0.00132178	-0.142764	0.00589132	-0.143918	0.0949474
828	66.3	7.79	5.463	28	0.166984	0.135315	0.110247	0.0316689	0.0316689	0.00100292	-0.102795	0.00911222	-0.17645	0.10266
829	66.3	7.79	5.463	28	0.121306	0.135315	0.110247	-0.0140094	0.0140094	0.000196263	-0.102795	0.00911222	-0.17645	0.10266
830	66.3	7.79	5.463	28	0.104256	0.135315	0.110247	-0.0310598	0.0310598	0.000964713	-0.102795	0.00911222	-0.17645	0.10266
831	66.3	7.79	5.463	35	0.24957	0.250514	0.104491	-0.000943489	0.000943489	8.90171e-07	-0.0695903	0.0191763	-0.139696	0.137835
832	66.3	7.79	5.463	35	0.286057	0.250514	0.104491	0.035543	0.035543	0.00126331	-0.0695903	0.0191763	-0.139696	0.137835
833	66.3	7.79	5.463	35	0.213996	0.250514	0.104491	-0.0365179	0.0365179	0.00133355	-0.0695903	0.0191763	-0.139696	0.137835
834	66.3	7.79	5.463	42	0.792939	0.556134	0.104487	0.236805	0.236805	0.0560767	0.00837246	0.0480317	0.00384949	0.193091
835	66.3	7.79	5.463	42	0.43088	0.556134	0.104487	-0.125254	0.125254	0.0156884	0.00837246	0.0480317	0.00384949	0.193091
836	66.3	7.79	5.463	42	0.446948	0.556134	0.104487	-0.109185	0.109185	0.0119215	0.00837246	0.0480317	0.00384949	0.193091
837	66.3	7.79	5.463	49	0.760031	0.839238	0.104497	-0.0792076	0.0792076	0.00627385	0.0774708	0.079035	0.115303	0.264641
838	66.3	7.79	5.463	49	0.854826	0.839238	0.104497	0.0155872	0.0155872	0.000242961	0.0774708	0.079035	0.115303	0.264641
839	66.3	7.79	5.463	49	0.921554	0.839238	0.104497	0.0823155	0.0823155	0.00677584	0.0774708	0.079035	0.115303	0.264641
840	66.3	7.79	5.463	56	0.875946	0.877806	0.110366	-0.00185978	0.00185978	3.45876e-06	0.0978444	0.0817986	0.1394	0.255974
841	66.3	7.79	5.463	56	0.808516	0.877806	0.110366	-0.0692897	0.0692897	0.00480106	0.0978444	0.0817986	0.1394	0.255974
842	66.3	7.79	5.463	56	0.941692	0.877806	0.110366	0.0638862	0.0638862	0.00408144	0.0978444	0.0817986	0.1394	0.255974
843	66.3	7.79	5.463	63	0.911169	0.912579	0.110878	-0.00140995	0.00140995	1.98795e-06	0.117737	0.0872509	0.158366	0.246437
844	66.3	7.79	5.463	63	0.841073	0.912579	0.110878	-0.0715062	0.0715062	0.00511314	0.117737	0.0872509	0.158366	0.246437
845	66.3	7.79	5.463	63	0.937131	0.912579	0.110878	0.0245516	0.0245516	0.000602782	0.117737	0.0872509	0.158366	0.246437
846	51.6	19.5	2.099	0	-0.044	0.0279734	0.0989377	-0.0719734	0.0719734	0.00518017	0.00227457	-0.0259072	0.0103808	-0.261563
847	51.6	19.5	2.099	0	0.088	0.0279734	0.0989377	0.0600266	0.0600266	0.00360319	0.00227457	-0.0259072	0.0103808	-0.261563
848	51.6	19.5	2.099	0	0.007	0.0279734	0.0989377	-0.0209734	0.0209734	0.000439884	0.00227457	-0.0259072	0.0103808	-0.261563
849	51.6	19.5	2.099	0	-0.02	0.0279734	0.0989377	-0.0479734	0.0479734	0.00230145	0.00227457	-0.0259072	0.0103808	-0.261563
850	51.6	19.5	2.099	0	-0.03	0.0279734	0.0989377	-0.0579734	0.0579734	0.00336092	0.00227457	-0.0259072	0.0103808	-0.261563
851	51.6	19.5	2.099	1	0.061	0.0723279	0.0961865	-0.0113279	0.0113279	0.00012832	0.00485399	-0.0434227	0.0162015	-0.208093
852	51.6	19.5	2.099	1	0.043	0.0723279	0.0961865	-0.0293279	0.0293279	0.000860123	0.00485399	-0.0434227	0.0162015	-0.208093
853	51.6	19.5	2.099	1	0.209	0.0723279	0.0961865	0.136672	0.136672	0.0186793	0.00485399	-0.0434227	0.0162015	-0.208093
854	51.6	19.5	2.099	3	0.043	0.164606	0.0972546	-0.121606	0.121606	0.0147881	0.0104928	-0.0766135	0.0280662	-0.100128
855	51.6	19.5	2.099	3	0.209	0.164606	0.0972546	0.0443937	0.0443937	0.0019708	0.0104928	-0.0766135	0.0280662	-0.100128
856	51.6	19.5	2.099	3	0.099	0.164606	0.0972546	-0.0656063	0.0656063	0.00430419	0.0104928	-0.0766135	0.0280662	-0.100128
857	51.6	19.5	2.099	3	0.133	0.164606	0.0972546	-0.0316063	0.0316063	0.000998959	0.0104928	-0.0766135	0.0280662	-0.100128
858	51.6	19.5	2.099	3	0.195	0.164606	0.0972546	0.0303937	0.0303937	0.000923776	0.0104928	-0.0766135	0.0280662	-0.100128
859	51.6	19.5	2.099	5	0.208508	0.268787	0.0981419	-0.060279	0.060279	0.00363355	0.0181649	-0.095261	0.0411007	0.00199341
860	51.6	19.5	2.099	5	0.334655	0.268787	0.0981419	0.0658682	0.0658682	0.00433861	0.0181649	-0.095261	0.0411007	0.00199341
861	51.6	19.5	2.099	5	0.205959	0.268787	0.0981419	-0.0628274	0.0628274	0.00394728	0.0181649	-0.095261	0.0411007	0.00199341
862	51.6	19.5	2.099	7	0.397053	0.378835	0.102177	0.0182176	0.0182176	0.000331881	0.0256409	-0.0940835	0.0550548	0.0894342
863	51.6	19.5	2.099	7	0.532698	0.378835	0.102177	0.153863	0.153863	0.0236739	0.0256409	-0.0940835	0.0550548	0.0894342
864	51.6	19.5	2.099	7	0.435858	0.378835	0.102177	0.0570232	0.0570232	0.00325164	0.0256409	-0.0940835	0.0550548	0.0894342
865	51.6	19.5	2.099	11	0.492804	0.558717	0.101272	-0.0659131	0.0659131	0.00434454	0.0377599	-0.0657777	0.0723589	0.211588
866	51.6	19.5	2.099	11	0.429223	0.558717	0.101272	-0.129494	0.129494	0.0167687	0.0377599	-0.0657777	0.0723589	0.211588
867	51.6	19.5	2.099	11	0.709246	0.558717	0.101272	0.150529	0.150529	0.0226589	0.0377599	-0.0657777	0.0723589	0.211588
868	51.6	19.5	2.099	14	0.594267	0.726275	0.0981235	-0.132008	0.132008	0.0174262	0.0685866	-0.0270302	0.0816148	0.300316
869	51.6	19.5	2.099	14	0.705279	0.726275	0.0981235	-0.0209965	0.0209965	0.000440854	0.0685866	-0.0270302	0.0816148	0.300316
870	51.6	19.5	2.099	14	0.576678	0.726275	0.0981235	-0.149598	0.149598	0.0223795	0.0685866	-0.0270302	0.0816148	0.300316
871	51.6	19.5	2.099	14	0.907747	0.726275	0.0981235	0.181472	0.181472	0.0329321	0.0685866	-0.0270302	0.0816148	0.300316
872	51.6	19.5	2.099	14	0.855015	0.726275	0.0981235	0.12874	0.12874	0.0165739	0.0685866	-0.0270302	0.0816148	0.300316
873	51.6	19.5	2.099	18	0.94708	0.89523	0.101858	0.0518501	0.0518501	0.00268844	0.112619	0.0112779	0.0912896	0.377255
874	51.6	19.5	2.099	18	0.858713	0.89523	0.101858	-0.0365171	0.0365171	0.0013335	0.112619	0.0112779	0.0912896	0.377255
875	51.6	19.5	2.099	18	0.908567	0.89523	0.101858	0.0133365	0.0133365	0.000177863	0.112619	0.0112779	0.0912896	0.377255
876	51.6	19.5	2.099	21	0.94529	0.881454	0.108875	0.0638355	0.0638355	0.00407497	0.122844	0.00231861	0.0818448	0.371658
877	51.6	19.5	2.099	21	0.934757	0.881454	0.108875	0.053303	0.053303	0.00284121	0.122844	0.00231861	0.0818448	0.371658
878	51.6	19.5	2.099	21	0.812054	0.881454	0.108875	-0.0693999	0.0693999	0.00481635	0.122844	0.00231861	0.0818448	0.371658
879	45.5	5.2	1.87062	0	-0.0300735	-0.0382809	0.0957784	0.00820737	0.00820737	6.73609e-05	0.0266317	-0.0287934	-0.0106423	-0.328265
880	45.5	5.2	1.87062	0	-0.0171849	-0.0382809	0.0957784	0.021096	0.021096	0.000445041	0.0266317	-0.0287934	-0.0106423	-0.328265
881	45.5	5.2	1.87062	0	0.054381	-0.0382809	0.0957784	0.0926619	0.0926619	0.00858622	0.0266317	-0.0287934	-0.0106423	-0.328265
882	45.5	5.2	1.87062	0	0.00689655	-0.0382809	0.0957784	0.0451774	0.0451774	0.002041	0.0266317	-0.0287934	-0.0106423	-0.328265
883	45.5	5.2	1.87062	0	0.0526851	-0.0382809	0.0957784	0.090966	0.090966	0.00827481	0.0266317	-0.0287934	-0.0106423	-0.328265
884	45.5	5.2	1.87062	0	-0.0667044	-0.0382809	0.0957784	-0.0284235	0.0284235	0.000807895	0.0266317	-0.0287934	-0.0106423	-0.328265
885	45.5	5.2	1.87062	0.25	0.0204635	-0.0213392	0.0947833	0.0418028	0.0418028	0.00174747	0.0305861	-0.0269994	-0.0211582	-0.306556
886	45.5	5.2	1.87062	0.25	-0.0758621	-0.0213392	0.0947833	-0.0545228	0.0545228	0.00297274	0.0305861	-0.0269994	-0.0211582	-0.306556
887	45.5	5.2	1.87062	0.25	0.0591295	-0.0213392	0.0947833	0.0804687	0.0804687	0.00647521	0.0305861	-0.0269994	-0.0211582	-0.306556
888	45.5	5.2	1.87062	1	0.0123233	0.0398221	0.093931	-0.0274987	0.0274987	0.00075618	0.0444687	-0.02004	-0.0488223	-0.238573
889	45.5	5.2	1.87062	1	-0.154551	0.0398221	0.093931	-0.194373	0.194373	0.0377807	0.0444687	-0.02004	-0.0488223	-0.238573
890	45.5	5.2	1.87062	1	-0.0361786	0.0398221	0.093931	-0.0760007	0.0760007	0.00577611	0.0444687	-0.02004	-0.0488223	-0.238573
891	45.5	5.2	1.87062	2	0.193103	0.151788	0.0942824	0.0413155	0.0413155	0.00170697	0.0686825	-0.0059369	-0.0714909	-0.142255
892	45.5	5.2	1.87062	2	0.0302996	0.151788	0.0942824	-0.121488	0.121488	0.0147594	0.0686825	-0.0059369	-0.0714909	-0.142255
893	45.5	5.2	1.87062	2	-0.0202374	0.151788	0.0942824	-0.172025	0.172025	0.0295927	0.0686825	-0.0059369	-0.0714909	-0.142255
894	45.5	5.2	1.87062	2.2	0.0882985	0.178275	0.0943517	-0.0899761	0.0899761	0.0080957	0.0742312	-0.0025084	-0.0736799	-0.122557
895	45.5	5.2	1.87062	2.2	0.091351	0.178275	0.0943517	-0.0869236	0.0869236	0.00755571	0.0742312	-0.0025084	-0.0736799	-0.122557
896	45.5	5.2	1.87062	2.2	0.0248728	0.178275	0.0943517	-0.153402	0.153402	0.0235321	0.0742312	-0.0025084	-0.0736799	-0.122557
897	45.5	5.2	1.87062	3	0.438327	0.292707	0.0946639	0.14562	0.14562	0.0212052	0.0974606	0.0119867	-0.0749606	-0.0445685
898	45.5	5.2	1.87062	3	0.519729	0.292707	0.0946639	0.227022	0.227022	0.051539	0.0974606	0.0119867	-0.0749606	-0.0445685
899	45.5	5.2	1.87062	3	0.49056	0.292707	0.0946639	0.197853	0.197853	0.0391458	0.0974606	0.0119867	-0.0749606	-0.0445685
900	45.5	5.2	1.87062	4	0.16156	0.437991	0.0961481	-0.276431	0.276431	0.0764142	0.124953	0.0281618	-0.0632559	0.0453443
901	45.5	5.2	1.87062	4	0.680497	0.437991	0.0961481	0.242506	0.242506	0.0588092	0.124953	0.0281618	-0.0632559	0.0453443
902	45.5	5.2	1.87062	4	0.384398	0.437991	0.0961481	-0.0535935	0.0535935	0.00287226	0.124953	0.0281618	-0.0632559	0.0453443
903	45.5	5.2	1.87062	5	0.77004	0.566365	0.102358	0.203675	0.203675	0.0414833	0.146725	0.0385378	-0.042648	0.120961
904	45.5	5.2	1.87062	5	0.817524	0.566365	0.102358	0.251159	0.251159	0.0630809	0.146725	0.0385378	-0.042648	0.120961
905	45.5	5.2	1.87062	5	0.385076	0.566365	0.102358	-0.181289	0.181289	0.0328656	0.146725	0.0385378	-0.042648	0.120961
906	45.5	4.5	0.917	0	0.0491928	0.00395678	0.0943902	0.0452361	0.0452361	0.0020463	0.0524934	0.00763428	-0.0155813	-0.343378
907	45.5	4.5	0.917	0	-0.0163976	0.00395678	0.0943902	-0.0203544	0.0203544	0.000414301	0.0524934	0.00763428	-0.0155813	-0.343378
908	45.5	4.5	0.917	0	0.0446168	0.00395678	0.0943902	0.04066	0.04066	0.00165323	0.0524934	0.00763428	-0.0155813	-0.343378
909	45.5	4.5	0.917	0	0.0122029	0.00395678	0.0943902	0.00824609	0.00824609	6.79981e-05	0.0524934	0.00763428	-0.0155813	-0.343378
910	45.5	4.5	0.917	0	-0.00533876	0.00395678	0.0943902	-0.00929554	0.00929554	8.6407e-05	0.0524934	0.00763428	-0.0155813	-0.343378
911	45.5	4.5	0.917	0	-0.0842761	0.00395678	0.0943902	-0.0882329	0.0882329	0.00778504	0.0524934	0.00763428	-0.0155813	-0.343378
912	45.5	4.5	0.917	0.0416667	-0.0122029	0.0144489	0.094261	-0.0266518	0.0266518	0.000710316	0.0546187	0.00931204	-0.0150624	-0.337208
913	45.5	4.5	0.917	0.0416667	0.0244057	0.0144489	0.094261	0.00995686	0.00995686	9.9139e-05	0.0546187	0.00931204	-0.0150624	-0.337208
914	45.5	4.5	0.917	0.0416667	0.0255498	0.0144489	0.094261	0.0111009	0.0111009	0.00012323	0.0546187	0.00931204	-0.0150624	-0.337208
915	45.5	4.5	0.917	0.125	0.0137282	0.0354268	0.0940563	-0.0216985	0.0216985	0.000470826	0.0588773	0.0126561	-0.0140277	-0.324868
916	45.5	4.5	0.917	0.125	0.0434727	0.0354268	0.0940563	0.00804598	0.00804598	6.47377e-05	0.0588773	0.0126561	-0.0140277	-0.324868
917	45.5	4.5	0.917	0.125	0.0160163	0.0354268	0.0940563	-0.0194105	0.0194105	0.000376767	0.0588773	0.0126561	-0.0140277	-0.324868
918	45.5	4.5	0.917	0.25	0.211262	0.066849	0.0938743	0.144413	0.144413	0.0208552	0.0652795	0.0176372	-0.0124848	-0.306372
919	45.5	4.5	0.917	0.25	0.207067	0.066849	0.0938743	0.140219	0.140219	0.0196612	0.0652795	0.0176372	-0.0124848	-0.306372
920	45.5	4.5	0.917	0.25	0	0.066849	0.0938743	-0.066849	0.066849	0.00446879	0.0652795	0.0176372	-0.0124848	-0.306372
921	45.5	4.5	0.917	1	0.208212	0.25135	0.0950173	-0.0431381	0.0431381	0.00186089	0.10343	0.0459721	-0.0036102	-0.197231
922	45.5	4.5	0.917	1	0.23338	0.25135	0.0950173	-0.0179697	0.0179697	0.000322908	0.10343	0.0459721	-0.0036102	-0.197231
923	45.5	4.5	0.917	1	0.100292	0.25135	0.0950173	-0.151057	0.151057	0.0228183	0.10343	0.0459721	-0.0036102	-0.197231
924	45.5	4.5	0.917	3	0.751621	0.629925	0.102626	0.121696	0.121696	0.0148098	0.18436	0.0896324	0.0107268	0.0424172
925	45.5	4.5	0.917	3	0.781747	0.629925	0.102626	0.151821	0.151821	0.0230497	0.18436	0.0896324	0.0107268	0.0424172
926	45.5	4.5	0.917	3	0.329478	0.629925	0.102626	-0.300448	0.300448	0.0902688	0.18436	0.0896324	0.0107268	0.0424172
927	45.5	4.5	0.917	7	0.438159	0.621332	0.103843	-0.183172	0.183172	0.0335521	0.17392	-0.017662	-0.0205089	0.182794
928	45.5	4.5	0.917	7	0.463328	0.621332	0.103843	-0.158004	0.158004	0.0249652	0.17392	-0.017662	-0.0205089	0.182794
929	45.5	4.5	0.917	7	0.808059	0.621332	0.103843	0.186727	0.186727	0.0348671	0.17392	-0.017662	-0.0205089	0.182794

## Sheet: File S5 (Avg Data)
AVG Data	ID		Drug Specific Parameters				Scaffold Specific Parameters (GPR Features)				In Vitro Observations		GPR Results						Shapley Values for Parameters
Observation #	Scaffold #	Drug	MW (g/mol)	LogP	PSA (Å)	pKa	%CAC	%Load (wt.)	Fd (µm)	Time (Days)	Avg Observed F(t)	Observed Stdev F(t)	Predicted F(t)	Predicted Stdev F(t)	90% CI (lower)	90% CI (upper)	AE	SE	Time	%CAC	%Load	Fd
1	1	DXR	579.15	1.27	206	8.2	47	3.81	0.63	0	0	0.0573531	0.0846546	0.0965144	-0.0765245	0.257693	0.0846546	0.0071664	-0.375183	0.0554486	0.0886671	-0.00588777
2	1	DXR	579.15	1.27	206	8.2	47	3.81	0.63	1	0.67682	0.119464	0.38142	0.0948223	0.223067	0.253175	0.2954	0.0872612	-0.215813	0.113391	0.147085	0.0151475
3	1	DXR	579.15	1.27	206	8.2	47	3.81	0.63	2	0.737317	0.0987198	0.629452	0.0950476	0.470722	0.253777	0.107865	0.0116349	-0.0772232	0.163161	0.191793	0.0301103
4	1	DXR	579.15	1.27	206	8.2	47	3.81	0.63	3	0.778072	0.0464598	0.798717	0.0955018	0.639229	0.25499	0.0206456	0.00042624	0.0278287	0.197785	0.215145	0.0363484
5	1	DXR	579.15	1.27	206	8.2	47	3.81	0.63	5	0.879969	0.0372092	0.904673	0.0996394	0.738275	0.266037	0.0247034	0.00061026	0.136189	0.219725	0.199574	0.0275748
6	2	DXR	579.15	1.27	206	8.2	50	4.32	0.548	0	0	0.0831367	0.0262532	0.0952237	-0.13277	0.254247	0.0262532	0.000689233	-0.34861	0.0126247	0.0550941	-0.0144659
7	2	DXR	579.15	1.27	206	8.2	50	4.32	0.548	1	0.33041	0.0238824	0.192151	0.0949629	0.0335627	0.253551	0.138259	0.0191157	-0.240622	0.0228329	0.0967264	-0.00839696
8	2	DXR	579.15	1.27	206	8.2	50	4.32	0.548	3	0.441136	0.0164627	0.418769	0.0972671	0.256333	0.259703	0.022367	0.000500282	-0.0765786	0.0331909	0.150917	-0.0103702
9	2	DXR	579.15	1.27	206	8.2	50	4.32	0.548	7	0.481833	0.119108	0.584751	0.0995046	0.418578	0.265677	0.102918	0.0105921	0.0745832	0.0570959	0.166338	-0.0348759
10	2	DXR	579.15	1.27	206	8.2	50	4.32	0.548	14	0.806762	0.157184	0.801336	0.108743	0.619736	0.290343	0.00542614	2.9443e-05	0.223914	0.092589	0.19119	-0.0279675
11	2	DXR	579.15	1.27	206	8.2	50	4.32	0.548	21	0.937517	0.0803876	0.880373	0.110477	0.695877	0.294973	0.0571442	0.00326546	0.280141	0.111147	0.178371	-0.0108962
12	3	DXR	579.15	1.27	206	8.2	59	3.93	0.428	0	0	0.113657	0.066175	0.0963036	-0.094652	0.257131	0.066175	0.00437913	-0.274297	-0.0632979	0.0933486	-0.0111885
13	3	DXR	579.15	1.27	206	8.2	59	3.93	0.428	1	0.367926	0.0585008	0.195462	0.0960184	0.0351113	0.256369	0.172463	0.0297436	-0.183525	-0.0701264	0.128001	-0.000498192
14	3	DXR	579.15	1.27	206	8.2	59	3.93	0.428	3	0.408844	0.0629005	0.360019	0.102302	0.189175	0.273146	0.0488246	0.00238384	-0.050558	-0.0890629	0.171852	0.00617785
15	3	DXR	579.15	1.27	206	8.2	59	3.93	0.428	7	0.407943	0.0243887	0.387269	0.100294	0.219778	0.267785	0.020674	0.000427415	0.0359159	-0.122147	0.171165	-0.0192753
16	3	DXR	579.15	1.27	206	8.2	59	3.93	0.428	14	0.556114	0.0195889	0.536767	0.104252	0.362667	0.278352	0.0193469	0.000374302	0.150937	-0.103367	0.192266	-0.0246794
17	3	DXR	579.15	1.27	206	8.2	59	3.93	0.428	21	0.526491	0.0854534	0.53144	0.104376	0.357132	0.278684	0.0049485	2.44877e-05	0.166584	-0.111091	0.179287	-0.0249506
18	3	DXR	579.15	1.27	206	8.2	59	3.93	0.428	28	0.691121	0.0799986	0.70212	0.108143	0.521521	0.288741	0.0109995	0.000120989	0.22829	-0.0629737	0.217735	-0.00254182
19	3	DXR	579.15	1.27	206	8.2	59	3.93	0.428	35	0.579024	0.211499	0.700792	0.101024	0.532081	0.269735	0.121768	0.0148274	0.240409	-0.0286743	0.153462	0.0139841
20	4	ERL	393.4	3.3	74.7	5.42	47	9.52	1.042	0	0	0.0306332	-0.00298066	0.0992848	-0.168786	0.26509	0.00298066	8.88436e-06	-0.337848	0.0580271	-0.0317733	-0.0129966
21	4	ERL	393.4	3.3	74.7	5.42	47	9.52	1.042	1	0.164108	0.0195339	0.0802813	0.0972191	-0.0820746	0.259575	0.0838266	0.00702689	-0.256973	0.0802991	-0.0462447	-0.0184106
22	4	ERL	393.4	3.3	74.7	5.42	47	9.52	1.042	2	0.180347	0.0317404	0.164067	0.0984032	-0.00026617	0.262737	0.0162797	0.000265028	-0.178885	0.102744	-0.0590411	-0.0223604
23	4	ERL	393.4	3.3	74.7	5.42	47	9.52	1.042	3	0.170301	0.0116512	0.255246	0.0994737	0.0891252	0.265595	0.0849448	0.00721562	-0.103708	0.126357	-0.0666171	-0.0223958
24	4	ERL	393.4	3.3	74.7	5.42	47	9.52	1.042	5	0.420758	0.225343	0.48969	0.0991451	0.324118	0.264717	0.0689315	0.00475155	0.0447969	0.182996	-0.0564328	-0.00328055
25	4	ERL	393.4	3.3	74.7	5.42	47	9.52	1.042	7	0.812026	0.124848	0.755535	0.105303	0.579679	0.281158	0.056491	0.00319123	0.180554	0.243605	-0.0232873	0.0330533
26	5	ERL	393.4	3.3	74.7	5.42	50	10.51	0.664	0	0	0.0277089	0.0142228	0.101021	-0.154482	0.269726	0.0142228	0.000202287	-0.232219	-0.000817537	-0.046897	-0.0274535
27	5	ERL	393.4	3.3	74.7	5.42	50	10.51	0.664	1	0.0669601	0.0485504	0.0338658	0.0978213	-0.129496	0.261183	0.0330944	0.00109524	-0.181819	-0.00735919	-0.0646526	-0.0339132
28	5	ERL	393.4	3.3	74.7	5.42	50	10.51	0.664	3	0.0640453	0.0395796	0.0629572	0.100897	-0.105541	0.269396	0.00108802	1.18379e-06	-0.0958437	-0.0217251	-0.0937226	-0.0473614
29	5	ERL	393.4	3.3	74.7	5.42	50	10.51	0.664	7	0.113023	0.0448264	0.127082	0.108124	-0.0534854	0.288691	0.0140586	0.000197644	0.0258299	-0.0391384	-0.120442	-0.060778
30	5	ERL	393.4	3.3	74.7	5.42	50	10.51	0.664	14	0.217225	0.0609629	0.166198	0.123426	-0.039924	0.329548	0.0510276	0.00260381	0.111147	-0.0389876	-0.164345	-0.0632268
31	5	ERL	393.4	3.3	74.7	5.42	50	10.51	0.664	21	0.373994	0.0313209	0.344517	0.110383	0.160177	0.294724	0.0294775	0.000868921	0.192262	0.0267761	-0.150125	-0.0460068
32	5	ERL	393.4	3.3	74.7	5.42	50	10.51	0.664	38	0.682575	0.0397449	0.65901	0.110792	0.473988	0.295814	0.0235649	0.000555303	0.301091	0.0807471	-0.0630308	0.0185932
33	5	ERL	393.4	3.3	74.7	5.42	50	10.51	0.664	49	0.756994	0.0795123	0.792292	0.111088	0.606775	0.296605	0.0352981	0.00124596	0.255519	0.143027	0.0271636	0.0449718
34	6	EVR	958.2	5.9	205	10.4	47	4.2	0.63475	0	0	0.0265469	0.0187907	0.0957856	-0.141171	0.255747	0.0187907	0.000353089	-0.386485	0.0463142	0.0512977	-0.0139462
35	6	EVR	958.2	5.9	205	10.4	47	4.2	0.63475	1	0.282222	0.0447634	0.309225	0.0951201	0.150374	0.253971	0.0270023	0.000729125	-0.229547	0.103868	0.107209	0.0060847
36	6	EVR	958.2	5.9	205	10.4	47	4.2	0.63475	2	0.48738	0.102934	0.555215	0.0960317	0.394842	0.256405	0.0678346	0.00460153	-0.0919053	0.154162	0.15088	0.0204683
37	6	EVR	958.2	5.9	205	10.4	47	4.2	0.63475	3	0.712198	0.105621	0.727035	0.0969592	0.565113	0.258881	0.0148369	0.000220133	0.0138232	0.190168	0.174804	0.0266295
38	6	EVR	958.2	5.9	205	10.4	47	4.2	0.63475	5	0.953608	0.0394583	0.844151	0.101418	0.674782	0.270786	0.109458	0.011981	0.126067	0.215217	0.162865	0.0183921
39	7	EVR	958.2	5.9	205	10.4	50	4.46	0.59495	0	0	0.0422272	-0.00447436	0.0953419	-0.163695	0.254563	0.00447436	2.00199e-05	-0.354895	0.00819991	0.0406092	-0.0199983
40	7	EVR	958.2	5.9	205	10.4	50	4.46	0.59495	1	0.175801	0.0720153	0.159282	0.0950171	0.00060296	0.253696	0.01652	0.000272909	-0.247663	0.0182925	0.0806717	-0.0136298
41	7	EVR	958.2	5.9	205	10.4	50	4.46	0.59495	3	0.291462	0.0103813	0.386089	0.096861	0.224331	0.258619	0.0946271	0.0089543	-0.0833011	0.0287854	0.133065	-0.01407
42	7	EVR	958.2	5.9	205	10.4	50	4.46	0.59495	5	0.501145	0.00760864	0.496489	0.0971344	0.334274	0.259349	0.00465586	2.1677e-05	0.0129553	0.0383973	0.1485	-0.0249734
43	7	EVR	958.2	5.9	205	10.4	50	4.46	0.59495	7	0.588278	0.0552065	0.565501	0.0974081	0.402829	0.26008	0.022777	0.000518792	0.0736709	0.0547941	0.149264	-0.0338386
44	7	EVR	958.2	5.9	205	10.4	50	4.46	0.59495	10	0.792642	0.117399	0.686737	0.104512	0.512202	0.279048	0.105905	0.0112159	0.153038	0.0824079	0.162032	-0.0323506
45	8	EVR	958.2	5.9	205	10.4	59	4.42	0.44935	0	0	0.0261977	-0.0121272	0.0963213	-0.172984	0.257178	0.0121272	0.000147068	-0.286609	-0.0719879	0.0480659	-0.023206
46	8	EVR	958.2	5.9	205	10.4	59	4.42	0.44935	1	0.0564027	0.0463305	0.102116	0.0961071	-0.0583831	0.256606	0.0457131	0.00208969	-0.201069	-0.0811965	0.0773025	-0.0145314
47	8	EVR	958.2	5.9	205	10.4	59	4.42	0.44935	3	0.169862	0.0620745	0.248797	0.10109	0.0799761	0.269911	0.0789348	0.0062307	-0.0741874	-0.103134	0.114701	-0.010193
48	8	EVR	958.2	5.9	205	10.4	59	4.42	0.44935	7	0.247049	0.0194467	0.287929	0.0998209	0.121228	0.266522	0.0408799	0.00167117	0.0175541	-0.135766	0.11841	-0.0338792
49	8	EVR	958.2	5.9	205	10.4	59	4.42	0.44935	14	0.487177	0.0140516	0.499572	0.103571	0.326609	0.276534	0.0123946	0.000153627	0.156386	-0.110074	0.162538	-0.0308878
50	8	EVR	958.2	5.9	205	10.4	59	4.42	0.44935	21	0.608266	0.0173566	0.552643	0.103637	0.379569	0.27671	0.0556233	0.00309395	0.193107	-0.109324	0.170386	-0.0231362
51	8	EVR	958.2	5.9	205	10.4	59	4.42	0.44935	28	0.764428	0.0292643	0.747976	0.101949	0.577722	0.272203	0.0164512	0.000270644	0.265638	-0.0610685	0.218875	0.00292161
52	8	EVR	958.2	5.9	205	10.4	59	4.42	0.44935	35	0.962594	0.0399301	0.823467	0.100451	0.655713	0.268205	0.139128	0.0193565	0.30465	-0.0141714	0.182036	0.0293413
53	9	PTX	853.9	2.5	221	10.4	64.5	5.2	0.341	0	0	0.00841271	0.00201093	0.0951438	-0.156879	0.254034	0.00201093	4.04384e-06	-0.223262	-0.0698195	0.00634098	-0.0328591
54	9	PTX	853.9	2.5	221	10.4	64.5	5.2	0.341	0.0833333	0.00964631	0.0296926	0.00348095	0.0948639	-0.154942	0.253287	0.00616536	3.80116e-05	-0.219197	-0.0729141	0.00697125	-0.0329895
55	9	PTX	853.9	2.5	221	10.4	64.5	5.2	0.341	0.166667	0.0155699	0.00208505	0.00491771	0.0946596	-0.153164	0.252741	0.0106522	0.000113469	-0.215149	-0.0760017	0.00758843	-0.0331297
56	9	PTX	853.9	2.5	221	10.4	64.5	5.2	0.341	1	0.0114643	0.0117637	0.0175319	0.0954095	-0.141802	0.254743	0.00606757	3.68154e-05	-0.176043	-0.105993	0.0129948	-0.0350374
57	9	PTX	853.9	2.5	221	10.4	64.5	5.2	0.341	3	0.0330999	0.00567987	0.0386964	0.0997468	-0.127881	0.266324	0.00559652	3.1321e-05	-0.098179	-0.162687	0.0200448	-0.0420925
58	9	PTX	853.9	2.5	221	10.4	64.5	5.2	0.341	6	0.0724099	0.0195043	0.0693311	0.100652	-0.0987584	0.268742	0.00307877	9.47881e-06	-0.0236485	-0.195243	0.018786	-0.0521737
59	9	PTX	853.9	2.5	221	10.4	64.5	5.2	0.341	9	0.137329	0.0549151	0.12664	0.103317	-0.0458994	0.275856	0.0106887	0.000114248	0.0341722	-0.194154	0.0190786	-0.0540669
60	9	PTX	853.9	2.5	221	10.4	64.5	5.2	0.341	12	0.222276	0.0282812	0.21077	0.103349	0.0381775	0.275941	0.0115057	0.000132381	0.0954342	-0.187781	0.029592	-0.0480852
61	9	PTX	853.9	2.5	221	10.4	64.5	5.2	0.341	15	0.259123	0.0521578	0.259565	0.101006	0.0908849	0.269687	0.000441915	1.95289e-07	0.136393	-0.1906	0.0365418	-0.0443795
62	9	PTX	853.9	2.5	221	10.4	64.5	5.2	0.341	18	0.284016	0.0553831	0.269452	0.103491	0.0966208	0.276322	0.0145642	0.000212117	0.153315	-0.196585	0.0338099	-0.0426979
63	9	PTX	853.9	2.5	221	10.4	64.5	5.2	0.341	21	0.307873	0.0455387	0.284618	0.107524	0.105052	0.28709	0.0232546	0.000540777	0.165388	-0.193286	0.0297265	-0.0388198
64	9	PTX	853.9	2.5	221	10.4	64.5	5.2	0.341	28	0.417628	0.0403026	0.419472	0.110155	0.235513	0.294113	0.00184384	3.39974e-06	0.238147	-0.154681	0.0321442	-0.0177484
65	9	PTX	853.9	2.5	221	10.4	64.5	5.2	0.341	35	0.456023	0.0181081	0.475201	0.126142	0.264545	0.336798	0.0191787	0.000367824	0.265558	-0.141261	0.0302416	-0.000947256
66	10	PTX	853.9	2.5	221	10.4	45	10.6	0.723	0	0	0.0257	0.0368188	0.097484	-0.125979	0.260282	0.0368188	0.00135563	-0.354695	0.0975872	-0.0158464	-0.0118372
67	10	PTX	853.9	2.5	221	10.4	45	10.6	0.723	1	0.2468	0.045	0.178251	0.0951651	0.0193252	0.254091	0.0685492	0.00469899	-0.253368	0.141782	-0.0237773	-0.00799648
68	10	PTX	853.9	2.5	221	10.4	45	10.6	0.723	2	0.3341	0.0915	0.317603	0.0956543	0.157861	0.255397	0.0164966	0.000272139	-0.155871	0.185849	-0.0296389	-0.00434546
69	10	PTX	853.9	2.5	221	10.4	45	10.6	0.723	3	0.4059	0.1345	0.451257	0.0960112	0.290918	0.25635	0.0453567	0.00205723	-0.0659957	0.227733	-0.0314471	-0.000643941
70	10	PTX	853.9	2.5	221	10.4	45	10.6	0.723	4	0.6275	0.0976	0.582415	0.0961346	0.42187	0.256679	0.0450848	0.00203264	0.0162384	0.26727	-0.026846	0.00414283
71	10	PTX	853.9	2.5	221	10.4	45	10.6	0.723	5	0.6188	0.0864	0.712105	0.0959635	0.551846	0.256223	0.0933051	0.00870584	0.091267	0.304231	-0.015476	0.0104734
72	10	PTX	853.9	2.5	221	10.4	45	10.6	0.723	6	0.8726	0.0958	0.835364	0.0960635	0.674938	0.25649	0.0372359	0.00138651	0.158094	0.337365	0.00048299	0.0178124
73	10	PTX	853.9	2.5	221	10.4	45	10.6	0.723	7	0.9435	0.037	0.94217	0.100056	0.775077	0.267148	0.00132994	1.76875e-06	0.214203	0.364444	0.0171583	0.0247542
74	11	PTX	853.9	2.5	221	10.4	50	7.68	0.5	0	0	0.161433	-0.0139329	0.0975129	-0.176779	0.260359	0.0139329	0.000194125	-0.256107	0.00401248	-0.0505952	-0.0328529
75	11	PTX	853.9	2.5	221	10.4	50	7.68	0.5	1	0	0.00837389	0.0172204	0.0985564	-0.147369	0.263145	0.0172204	0.000296544	-0.198877	-0.00425669	-0.0587907	-0.0424647
76	11	PTX	853.9	2.5	221	10.4	50	7.68	0.5	7	0.131734	0.0504188	0.127313	0.10915	-0.0549674	0.291431	0.00442126	1.95476e-05	0.0190783	-0.0342812	-0.0794376	-0.0996564
77	11	PTX	853.9	2.5	221	10.4	50	7.68	0.5	14	0.23785	0.0148831	0.242299	0.104137	0.06839	0.278046	0.00444913	1.97948e-05	0.133704	-0.0244825	-0.0868088	-0.101724
78	11	PTX	853.9	2.5	221	10.4	50	7.68	0.5	21	0.374522	0.0578843	0.380862	0.104185	0.206873	0.278174	0.00634011	4.01969e-05	0.209657	0.0138502	-0.0801729	-0.0840821
79	11	PTX	853.9	2.5	221	10.4	50	7.68	0.5	28	0.528457	0.0806594	0.528509	0.104507	0.353982	0.279034	5.24587e-05	2.75191e-09	0.276341	0.0405818	-0.0514854	-0.058538
80	11	PTX	853.9	2.5	221	10.4	50	7.68	0.5	35	0.712249	0.126506	0.639082	0.110504	0.454541	0.295046	0.0731662	0.0053533	0.322098	0.0414647	-0.0288457	-0.0172448
81	12	PTX	853.9	2.5	221	10.4	60	8.22	0.715	0	0	0.0393452	0.0182306	0.0965913	-0.143077	0.257899	0.0182306	0.000332356	-0.210248	-0.0512656	-0.0240479	-0.0178183
82	12	PTX	853.9	2.5	221	10.4	60	8.22	0.715	1	0.0987571	0.0254726	0.0573647	0.0972139	-0.104983	0.259561	0.0413924	0.00171333	-0.157472	-0.0635814	-0.0254949	-0.0176967
83	12	PTX	853.9	2.5	221	10.4	60	8.22	0.715	7	0.181286	0.0649259	0.163909	0.101663	-0.00586836	0.27144	0.0173765	0.000301944	0.0322479	-0.138885	-0.0277477	-0.023316
84	12	PTX	853.9	2.5	221	10.4	60	8.22	0.715	14	0.201492	0.0581295	0.218616	0.105247	0.042854	0.281008	0.0171237	0.00029322	0.119351	-0.151194	-0.0460505	-0.0251004
85	12	PTX	853.9	2.5	221	10.4	60	8.22	0.715	21	0.2058	0.0303215	0.224055	0.105423	0.0479997	0.281478	0.0182552	0.000333251	0.136601	-0.156278	-0.0597118	-0.0181666
86	12	PTX	853.9	2.5	221	10.4	60	8.22	0.715	28	0.248653	0.0643724	0.247206	0.112129	0.05995	0.299385	0.00144687	2.09343e-06	0.162354	-0.162723	-0.0754787	0.00144273
87	12	PTX	853.9	2.5	221	10.4	60	8.22	0.715	35	0.335408	0.0116897	0.37859	0.108454	0.197472	0.289572	0.0431826	0.00186474	0.234505	-0.126842	-0.068029	0.0173453
88	12	PTX	853.9	2.5	221	10.4	60	8.22	0.715	42	0.34627	0.0485645	0.300791	0.113937	0.110516	0.304212	0.0454792	0.00206835	0.135969	-0.138687	-0.0348429	0.0167426
89	12	PTX	853.9	2.5	221	10.4	60	8.22	0.715	49	0.378294	0.0313889	0.353975	0.110206	0.16993	0.294251	0.0243192	0.000591421	0.11473	-0.112689	0.00843321	0.0218901
90	12	PTX	853.9	2.5	221	10.4	60	8.22	0.715	56	0.407295	0.0570868	0.379383	0.102778	0.207744	0.274417	0.0279116	0.000779058	0.0764501	-0.0631155	0.0230965	0.0213418
91	12	PTX	853.9	2.5	221	10.4	60	8.22	0.715	63	0.443996	0.0703623	0.430082	0.109499	0.247219	0.292363	0.0139139	0.000193595	0.0651555	-0.00649807	0.0316182	0.0181966
92	13	PTX	853.9	2.5	221	10.4	43	19.8	1.41296	0	0	0.0381302	0.0187114	0.0977561	-0.144541	0.261009	0.0187114	0.000350116	-0.359195	0.080589	-0.0171136	-0.00717865
93	13	PTX	853.9	2.5	221	10.4	43	19.8	1.41296	1	0.136334	0.0185297	0.115796	0.0961711	-0.0448098	0.256777	0.0205384	0.000421824	-0.28232	0.106166	-0.027909	-0.00175092
94	13	PTX	853.9	2.5	221	10.4	43	19.8	1.41296	2	0.276459	0.045721	0.227428	0.0978838	0.0639616	0.26135	0.0490319	0.00240413	-0.201379	0.134709	-0.0339269	0.00641417
95	13	PTX	853.9	2.5	221	10.4	43	19.8	1.41296	3	0.465503	0.0652582	0.356165	0.0983578	0.191908	0.262615	0.109338	0.0119548	-0.11757	0.166581	-0.0330561	0.0186007
96	13	PTX	853.9	2.5	221	10.4	43	19.8	1.41296	4	0.845011	0.149248	0.506766	0.0971133	0.344587	0.259292	0.338245	0.11441	-0.0307865	0.202666	-0.023191	0.0364674
97	13	PTX	853.9	2.5	221	10.4	43	19.8	1.41296	5	0.890416	0.110658	0.680453	0.0946368	0.52241	0.25268	0.209963	0.0440843	0.0585064	0.243117	-0.0035262	0.0607462
98	13	PTX	853.9	2.5	221	10.4	43	19.8	1.41296	6	0.949266	0.0742047	0.865733	0.0939197	0.708887	0.250766	0.0835331	0.00697778	0.146514	0.285142	0.0234491	0.0890175
99	13	PTX	853.9	2.5	221	10.4	43	19.8	1.41296	7	0.979761	0.0141712	1.03876	0.103307	0.866233	0.27583	0.0589946	0.00348036	0.226196	0.323032	0.0521192	0.115798
100	14	PTX	853.9	2.5	221	10.4	52	19.3	0.739	0	0	0.0181282	-0.00490546	0.0960625	-0.16533	0.256487	0.00490546	2.40636e-05	-0.268928	-0.0255919	-0.0126914	-0.0193045
101	14	PTX	853.9	2.5	221	10.4	52	19.3	0.739	1	0	0.0049371	0.0136701	0.0956205	-0.146016	0.255307	0.0136701	0.000186871	-0.226591	-0.0331846	-0.0258957	-0.0222685
102	14	PTX	853.9	2.5	221	10.4	52	19.3	0.739	3	0.0723804	0.0151127	0.0810796	0.0997485	-0.0855005	0.266329	0.00869922	7.56765e-05	-0.13847	-0.0430234	-0.033482	-0.0255551
103	14	PTX	853.9	2.5	221	10.4	52	19.3	0.739	6	0.164076	0.065823	0.219109	0.102749	0.0475195	0.274339	0.0550332	0.00302866	-0.0169728	-0.0463665	-0.0139465	-0.0252148
104	14	PTX	853.9	2.5	221	10.4	52	19.3	0.739	9	0.328759	0.197738	0.30665	0.0991945	0.140995	0.264849	0.0221094	0.000488824	0.0649132	-0.0516381	-0.00158794	-0.0266473
105	14	PTX	853.9	2.5	221	10.4	52	19.3	0.739	12	0.416493	0.11581	0.393033	0.0985921	0.228384	0.263241	0.0234607	0.000550406	0.132376	-0.0433113	0.00971978	-0.0273618
106	14	PTX	853.9	2.5	221	10.4	52	19.3	0.739	15	0.485709	0.0721588	0.535054	0.0988225	0.37002	0.263856	0.0493448	0.00243491	0.210295	-0.00991015	0.0351435	-0.0220847
107	14	PTX	853.9	2.5	221	10.4	52	19.3	0.739	18	0.549567	0.0950483	0.621171	0.0988203	0.456141	0.26385	0.071604	0.00512713	0.257937	0.0167728	0.043341	-0.0184902
108	14	PTX	853.9	2.5	221	10.4	52	19.3	0.739	21	0.697123	0.0588674	0.653389	0.100326	0.485845	0.267869	0.0437337	0.00191264	0.274313	0.0334676	0.0369897	-0.0129918
109	14	PTX	853.9	2.5	221	10.4	52	19.3	0.739	28	0.837546	0.101971	0.836519	0.101524	0.666974	0.271069	0.00102644	1.05358e-06	0.342137	0.0846263	0.0656006	0.0225452
110	14	PTX	853.9	2.5	221	10.4	52	19.3	0.739	35	0.921828	0.0805954	0.92157	0.101893	0.751408	0.272056	0.000257591	6.63529e-08	0.369758	0.107938	0.0730973	0.0491667
111	15	PTX	853.9	2.5	221	10.4	52	19.9	0.737	0	0	0.0216825	-0.000784519	0.0983838	-0.165085	0.262685	0.000784519	6.1547e-07	-0.277382	-0.0222851	-0.00458917	-0.0181387
112	15	PTX	853.9	2.5	221	10.4	52	19.9	0.737	1	0.0100711	0.0316499	0.0167222	0.0962814	-0.144068	0.257071	0.00665115	4.42378e-05	-0.23549	-0.030015	-0.0182183	-0.0211651
113	15	PTX	853.9	2.5	221	10.4	52	19.9	0.737	3	0.0756164	0.0163655	0.0813366	0.0979314	-0.0822088	0.261477	0.00572022	3.27209e-05	-0.148422	-0.0403108	-0.0267873	-0.0247536
114	15	PTX	853.9	2.5	221	10.4	52	19.9	0.737	6	0.230048	0.126375	0.218877	0.0991308	0.0533283	0.264679	0.0111709	0.00012479	-0.0269931	-0.0437902	-0.00718464	-0.0247654
115	15	PTX	853.9	2.5	221	10.4	52	19.9	0.737	9	0.304528	0.153013	0.322714	0.0986164	0.158025	0.263306	0.0181866	0.000330752	0.0610299	-0.0459865	0.0113966	-0.0253357
116	15	PTX	853.9	2.5	221	10.4	52	19.9	0.737	12	0.411922	0.101579	0.464158	0.0988951	0.299003	0.26405	0.0522353	0.00272853	0.147942	-0.0264734	0.0421724	-0.0210935
117	15	PTX	853.9	2.5	221	10.4	52	19.9	0.737	15	0.657546	0.274465	0.680271	0.10013	0.513054	0.267347	0.0227244	0.0005164	0.251204	0.0224883	0.0929297	-0.00796157
118	15	PTX	853.9	2.5	221	10.4	52	19.9	0.737	18	0.848951	0.0649003	0.774069	0.0990525	0.608651	0.26447	0.0748822	0.00560735	0.301545	0.0507068	0.103808	-0.00360174
119	15	PTX	853.9	2.5	221	10.4	52	19.9	0.737	21	0.690773	0.0287302	0.743751	0.100308	0.576236	0.267823	0.052978	0.00280667	0.296977	0.0536551	0.0765017	-0.00499301
120	15	PTX	853.9	2.5	221	10.4	52	19.9	0.737	28	0.858503	0.110751	0.856214	0.101532	0.686655	0.271092	0.00228921	5.24049e-06	0.339683	0.0901294	0.0799518	0.0248402
121	15	PTX	853.9	2.5	221	10.4	52	19.9	0.737	35	0.934799	0.0708826	0.929494	0.101916	0.759295	0.272115	0.00530496	2.81426e-05	0.363042	0.110907	0.0830766	0.0508578
122	16	PTX	853.9	2.5	221	10.4	61	18.4	0.499	0	0	0.0196069	-0.000924417	0.095296	-0.160069	0.25444	0.000924417	8.54547e-07	-0.183388	-0.0770922	-0.0391319	-0.022922
123	16	PTX	853.9	2.5	221	10.4	61	18.4	0.499	0.0833333	0.00375089	0.00612334	-0.00102674	0.0950413	-0.159746	0.25376	0.00477763	2.28257e-05	-0.180604	-0.0782446	-0.040718	-0.0230702
124	16	PTX	853.9	2.5	221	10.4	61	18.4	0.499	0.166667	0.000929678	0.0178144	-0.00111761	0.0948739	-0.159557	0.253313	0.00204729	4.19139e-06	-0.177815	-0.0794049	-0.0422866	-0.0232207
125	16	PTX	853.9	2.5	221	10.4	61	18.4	0.499	1	0.0006513	0.00392893	-0.00122502	0.0964544	-0.162304	0.257533	0.00187632	3.52057e-06	-0.149962	-0.0913283	-0.0567176	-0.024827
126	16	PTX	853.9	2.5	221	10.4	61	18.4	0.499	3	0.0139757	0.00619503	0.00655817	0.102486	-0.164593	0.273637	0.00741749	5.50191e-05	-0.0877887	-0.120025	-0.0783392	-0.028899
127	16	PTX	853.9	2.5	221	10.4	61	18.4	0.499	6	0.0347639	0.0185432	0.0374473	0.100691	-0.130707	0.268846	0.0026834	7.20064e-06	-0.0135424	-0.154933	-0.0815505	-0.0341373
128	16	PTX	853.9	2.5	221	10.4	61	18.4	0.499	9	0.0812139	0.0109783	0.080414	0.100404	-0.0872605	0.268078	0.000799925	6.39881e-07	0.0428364	-0.171058	-0.0768204	-0.0361543
129	16	PTX	853.9	2.5	221	10.4	61	18.4	0.499	12	0.116677	0.0131435	0.109398	0.100404	-0.0582771	0.26808	0.00727904	5.29845e-05	0.0843818	-0.174997	-0.0843026	-0.0372945
130	16	PTX	853.9	2.5	221	10.4	61	18.4	0.499	15	0.121012	0.0480694	0.133588	0.100717	-0.0346103	0.268916	0.0125755	0.000158143	0.117245	-0.174255	-0.0936948	-0.0373177
131	16	PTX	853.9	2.5	221	10.4	61	18.4	0.499	18	0.200209	0.00447438	0.189625	0.1032	0.01728	0.275545	0.0105845	0.000112032	0.149878	-0.164422	-0.0864771	-0.030965
132	16	PTX	853.9	2.5	221	10.4	61	18.4	0.499	21	0.236099	0.0559863	0.237859	0.10327	0.0653981	0.275731	0.00175996	3.09745e-06	0.170143	-0.156456	-0.0736834	-0.0237545
133	16	PTX	853.9	2.5	221	10.4	61	18.4	0.499	28	0.320454	0.0340107	0.306317	0.12646	0.0951287	0.337649	0.0141371	0.000199859	0.219143	-0.145347	-0.0848135	-0.00427551
134	16	PTX	853.9	2.5	221	10.4	61	18.4	0.499	35	0.455971	0.0584854	0.333733	0.372102	-0.287676	0.993511	0.122237	0.014942	0.25368	-0.125785	-0.129794	0.014022
135	17	PTX	853.9	2.5	221	10.4	64.5	10.46	0.526	0	0	0.0241926	-0.000172471	0.0954365	-0.159552	0.254816	0.000172471	2.97461e-08	-0.2017	-0.0611284	-0.0349697	-0.0239842
136	17	PTX	853.9	2.5	221	10.4	64.5	10.46	0.526	0.0833333	0.0113995	0.0148421	0.000515345	0.0951012	-0.158304	0.25392	0.0108842	0.000118466	-0.198663	-0.0627825	-0.0355151	-0.0241345
137	17	PTX	853.9	2.5	221	10.4	64.5	10.46	0.526	0.166667	0	0.038623	0.00121575	0.0948455	-0.157176	0.253237	0.00121575	1.47805e-06	-0.195623	-0.064429	-0.0360558	-0.0242862
138	17	PTX	853.9	2.5	221	10.4	64.5	10.46	0.526	1	0.000406808	0.0185473	0.00906522	0.0954244	-0.150293	0.254783	0.00865841	7.49681e-05	-0.16541	-0.0802307	-0.0410772	-0.025827
139	17	PTX	853.9	2.5	221	10.4	64.5	10.46	0.526	3	0.0415123	0.00447612	0.0358044	0.101711	-0.134054	0.27157	0.00570786	3.25796e-05	-0.0985276	-0.109888	-0.048522	-0.0288682
140	17	PTX	853.9	2.5	221	10.4	64.5	10.46	0.526	6	0.103401	0.00704363	0.0964792	0.103167	-0.0758093	0.275455	0.00692138	4.79055e-05	-0.0170498	-0.131206	-0.0471696	-0.0297058
141	17	PTX	853.9	2.5	221	10.4	64.5	10.46	0.526	9	0.175097	0.0461659	0.182003	0.100643	0.01393	0.268716	0.00690622	4.76959e-05	0.0508362	-0.126105	-0.0398277	-0.0245103
142	17	PTX	853.9	2.5	221	10.4	64.5	10.46	0.526	12	0.27589	0.0299966	0.258133	0.101155	0.0892032	0.270085	0.0177576	0.000315331	0.102318	-0.107437	-0.0401221	-0.0182367
143	17	PTX	853.9	2.5	221	10.4	64.5	10.46	0.526	15	0.325853	0.0904905	0.276924	0.107755	0.0969726	0.287706	0.0489298	0.00239413	0.125083	-0.10176	-0.0511148	-0.0168949
144	17	PTX	853.9	2.5	221	10.4	64.5	10.46	0.526	18	0.351658	0.112965	0.304397	0.104685	0.129573	0.279509	0.0472603	0.00223354	0.143	-0.0961378	-0.0528207	-0.0112542
145	17	PTX	853.9	2.5	221	10.4	64.5	10.46	0.526	21	0.390105	0.0457256	0.368221	0.107289	0.189048	0.286463	0.0218844	0.000478928	0.167838	-0.0769455	-0.0444976	0.000215787
146	17	PTX	853.9	2.5	221	10.4	64.5	10.46	0.526	28	0.553149	0.0385978	0.567075	0.109841	0.383641	0.293275	0.0139257	0.000193925	0.25757	-0.0181872	-0.0273233	0.033405
147	17	PTX	853.9	2.5	221	10.4	64.5	10.46	0.526	35	0.573603	0.0393051	0.565887	0.110373	0.381564	0.294696	0.00771573	5.95325e-05	0.283193	-0.0548931	-0.0279667	0.0439438
148	18	PTX	853.9	2.5	221	10.4	61	9.4	0.533	0	0	0.007046	-0.00479467	0.0957729	-0.164735	0.255714	0.00479467	2.29888e-05	-0.194874	-0.0653845	-0.0355005	-0.0306462
149	18	PTX	853.9	2.5	221	10.4	61	9.4	0.533	0.0833333	0	0.00752166	-0.00342074	0.095494	-0.162896	0.254969	0.00342074	1.17015e-05	-0.191263	-0.0667185	-0.0362756	-0.0307742
150	18	PTX	853.9	2.5	221	10.4	61	9.4	0.533	0.166667	0	0.00862871	-0.00208372	0.095282	-0.161205	0.254403	0.00208372	4.34188e-06	-0.18767	-0.0680597	-0.0370556	-0.0309086
151	18	PTX	853.9	2.5	221	10.4	61	9.4	0.533	1	0.0040776	0.00869233	0.00922915	0.0958058	-0.150767	0.255802	0.00515155	2.65385e-05	-0.153113	-0.0817409	-0.0449465	-0.0325807
152	18	PTX	853.9	2.5	221	10.4	61	9.4	0.533	3	0.0106508	0.00695522	0.0248065	0.101266	-0.144307	0.270379	0.0141556	0.000200381	-0.0845023	-0.113517	-0.0605896	-0.0381949
153	18	PTX	853.9	2.5	221	10.4	61	9.4	0.533	6	0.0434441	0.0213474	0.0485226	0.10281	-0.123171	0.274504	0.00507848	2.5791e-05	-0.0124587	-0.147829	-0.0670439	-0.045756
154	18	PTX	853.9	2.5	221	10.4	61	9.4	0.533	9	0.0796301	0.012853	0.0837254	0.103016	-0.0883117	0.275053	0.00409532	1.67716e-05	0.0388916	-0.160481	-0.0681154	-0.0481798
155	18	PTX	853.9	2.5	221	10.4	61	9.4	0.533	12	0.114609	0.0283137	0.128546	0.102779	-0.0430954	0.274421	0.013937	0.000194241	0.0806917	-0.152557	-0.0754226	-0.0457766
156	18	PTX	853.9	2.5	221	10.4	61	9.4	0.533	15	0.172518	0.0342509	0.176733	0.100098	0.00956918	0.267262	0.00421539	1.77695e-05	0.115141	-0.137416	-0.0830616	-0.0395407
157	18	PTX	853.9	2.5	221	10.4	61	9.4	0.533	18	0.224576	0.0314601	0.216003	0.100394	0.0483451	0.268052	0.00857335	7.35023e-05	0.137669	-0.128067	-0.0856928	-0.0295165
158	18	PTX	853.9	2.5	221	10.4	61	9.4	0.533	21	0.21936	0.0578798	0.21729	0.101886	0.0471403	0.272036	0.00206939	4.28238e-06	0.139448	-0.130909	-0.0912663	-0.021593
159	18	PTX	853.9	2.5	221	10.4	61	9.4	0.533	28	0.310616	0.0095711	0.298858	0.107767	0.118888	0.287737	0.011757	0.000138228	0.188118	-0.11279	-0.103107	0.00502675
160	18	PTX	853.9	2.5	221	10.4	61	9.4	0.533	35	0.584778	0.123771	0.569046	0.108154	0.388429	0.288771	0.0157325	0.000247511	0.310696	-0.0520869	-0.0584965	0.0473228
161	19	PTX	853.9	2.5	221	10.4	61	27.7	0.876	0	0	0.0219465	-0.00538454	0.0944953	-0.163192	0.252302	0.00538454	2.89933e-05	-0.177915	-0.0674746	-0.0725774	-0.00902807
162	19	PTX	853.9	2.5	221	10.4	61	27.7	0.876	0.0833333	0.00123007	0.0227729	-0.00585773	0.0942218	-0.163208	0.251572	0.0070878	5.02369e-05	-0.175489	-0.0684045	-0.0744193	-0.00915498
163	19	PTX	853.9	2.5	221	10.4	61	27.7	0.876	0.166667	0.00436699	0.0211331	-0.00631411	0.0940241	-0.163334	0.251044	0.0106811	0.000114086	-0.173059	-0.0693369	-0.0762468	-0.00928149
164	19	PTX	853.9	2.5	221	10.4	61	27.7	0.876	1	0.0356313	0.00957045	-0.00964385	0.0948389	-0.168025	0.25322	0.0452752	0.00204984	-0.148712	-0.0786489	-0.0934571	-0.0104357
165	19	PTX	853.9	2.5	221	10.4	61	27.7	0.876	3	0.00384924	0.0147314	-0.00628458	0.0998172	-0.172979	0.266512	0.0101338	0.000102694	-0.0938142	-0.0987084	-0.124031	-0.0113408
166	19	PTX	853.9	2.5	221	10.4	61	27.7	0.876	6	0.00504716	0.0131349	0.013759	0.102794	-0.157908	0.274461	0.00871179	7.58953e-05	-0.0298745	-0.12045	-0.1485	-0.00902656
167	19	PTX	853.9	2.5	221	10.4	61	27.7	0.876	9	0.0457256	0.0243475	0.0400952	0.100698	-0.128071	0.268864	0.00563046	3.17021e-05	0.0175165	-0.132574	-0.160682	-0.00577606
168	19	PTX	853.9	2.5	221	10.4	61	27.7	0.876	12	0.0676435	0.0201157	0.0756616	0.100447	-0.0920846	0.268193	0.00801805	6.42892e-05	0.0598567	-0.136821	-0.164881	-0.00410352
169	19	PTX	853.9	2.5	221	10.4	61	27.7	0.876	15	0.140168	0.035746	0.133575	0.101298	-0.0355916	0.270465	0.00659294	4.34669e-05	0.102446	-0.132682	-0.157516	-0.000282766
170	19	PTX	853.9	2.5	221	10.4	61	27.7	0.876	18	0.170015	0.0269376	0.180426	0.107661	0.000631543	0.287456	0.0104111	0.00010839	0.129435	-0.126067	-0.147189	0.00263665
171	19	PTX	853.9	2.5	221	10.4	61	27.7	0.876	21	0.213739	0.0191822	0.212274	0.103526	0.039385	0.276415	0.00146488	2.14587e-06	0.141261	-0.118195	-0.13694	0.00453739
172	19	PTX	853.9	2.5	221	10.4	61	27.7	0.876	28	0.290578	0.0649791	0.371282	0.124894	0.162709	0.333468	0.0807039	0.00651312	0.21314	-0.0715895	-0.109436	0.0175572
173	19	PTX	853.9	2.5	221	10.4	61	27.7	0.876	35	0.5632	0.205868	0.647208	0.110887	0.462027	0.296067	0.0840084	0.00705741	0.328074	0.001528	-0.0470563	0.0430522
174	20	RESI	314.4	1.3	86.2	14.63	31	9.49	1.215	0	0	0.0855076	0.0350705	0.0960656	-0.125359	0.256495	0.0350705	0.00122994	-0.311693	0.036738	-0.00904401	-0.00254053
175	20	RESI	314.4	1.3	86.2	14.63	31	9.49	1.215	0.166667	0.0903131	0.0483224	0.055723	0.0954626	-0.1037	0.254885	0.0345902	0.00119648	-0.298363	0.0404162	-0.00734621	-0.000594426
176	20	RESI	314.4	1.3	86.2	14.63	31	9.49	1.215	1	0.154224	0.04822	0.165925	0.0960746	0.0054805	0.256519	0.0117013	0.000136919	-0.229543	0.061357	0.00204199	0.0104589
177	20	RESI	314.4	1.3	86.2	14.63	31	9.49	1.215	3	0.433856	0.0403857	0.45476	0.100161	0.287492	0.267429	0.0209038	0.00043697	-0.062052	0.122246	0.0291749	0.0437811
178	20	RESI	314.4	1.3	86.2	14.63	31	9.49	1.215	5	0.742728	0.166103	0.711261	0.0989752	0.545973	0.264264	0.0314663	0.000990125	0.0827184	0.175265	0.0556244	0.0760437
179	20	RESI	314.4	1.3	86.2	14.63	31	9.49	1.215	7	0.901323	0.0800818	0.873615	0.105053	0.698176	0.280493	0.0277083	0.000767747	0.183426	0.201587	0.0720911	0.0949008
180	20	RESI	314.4	1.3	86.2	14.63	31	9.49	1.215	14	0.986559	0.0148664	0.99609	0.110282	0.811919	0.294453	0.00953069	9.08341e-05	0.292981	0.217842	0.0703653	0.093291
181	20	RESI	314.4	1.3	86.2	14.63	31	9.49	1.215	21	0.973988	0.0097785	0.967194	0.104794	0.792188	0.279801	0.00679332	4.61492e-05	0.278753	0.210131	0.0661774	0.0905225
182	21	RESI	314.4	1.3	86.2	14.63	43.5	8.05	2.57	0	0	0.126291	0.0533901	0.096436	-0.107658	0.257484	0.0533901	0.0028505	-0.301272	0.0443564	-0.0179033	0.00659884
183	21	RESI	314.4	1.3	86.2	14.63	43.5	8.05	2.57	0.166667	0.0488436	0.0149824	0.0670843	0.0956137	-0.0925906	0.255289	0.0182407	0.000332722	-0.287898	0.0470617	-0.0169576	0.00326804
184	21	RESI	314.4	1.3	86.2	14.63	43.5	8.05	2.57	1	0.16228	0.0622015	0.134574	0.0945857	-0.0233843	0.252544	0.0277059	0.000767617	-0.221201	0.0600466	-0.0125046	-0.0133771
185	21	RESI	314.4	1.3	86.2	14.63	43.5	8.05	2.57	2	0.215033	0.0354531	0.206956	0.0959283	0.046756	0.256129	0.00807676	6.5234e-05	-0.145382	0.0729193	-0.00846464	-0.0337261
186	21	RESI	314.4	1.3	86.2	14.63	43.5	8.05	2.57	3	0.244989	0.0527232	0.262539	0.0972603	0.100114	0.259685	0.0175497	0.00030799	-0.0786098	0.0811218	-0.00666398	-0.0549194
187	21	RESI	314.4	1.3	86.2	14.63	43.5	8.05	2.57	5	0.334967	0.133117	0.318197	0.0994009	0.152197	0.2654	0.0167703	0.000281244	0.0214	0.0832936	-0.010403	-0.0977041
188	21	RESI	314.4	1.3	86.2	14.63	43.5	8.05	2.57	7	0.360848	0.0662715	0.34498	0.103513	0.172114	0.276379	0.0158676	0.00025178	0.0886275	0.0793665	-0.017984	-0.12664
189	21	RESI	314.4	1.3	86.2	14.63	43.5	8.05	2.57	10	0.486178	0.140219	0.515391	0.102057	0.344956	0.272492	0.0292123	0.000853359	0.192565	0.106914	-0.0100899	-0.0956085
190	21	RESI	314.4	1.3	86.2	14.63	43.5	8.05	2.57	14	0.965986	0.00947858	0.924191	0.101942	0.753947	0.272186	0.0417945	0.00174678	0.345998	0.18516	0.0316065	0.0398165
191	21	RESI	314.4	1.3	86.2	14.63	43.5	8.05	2.57	17	0.973376	0.0121457	0.986495	0.103803	0.813143	0.277155	0.0131191	0.00017211	0.36289	0.185953	0.036452	0.07959
192	22	RESI	314.4	1.3	86.2	14.63	49	8.4	1.80507	0	0	0.0780197	0.0448623	0.0964437	-0.116199	0.257505	0.0448623	0.00201262	-0.278434	0.0269639	-0.0328141	0.00753674
193	22	RESI	314.4	1.3	86.2	14.63	49	8.4	1.80507	0.166667	0.139689	0.0112448	0.0562961	0.0958513	-0.103776	0.255923	0.083393	0.00695439	-0.267092	0.0282182	-0.0333107	0.00687087
194	22	RESI	314.4	1.3	86.2	14.63	49	8.4	1.80507	1	0.159223	0.0314351	0.111049	0.0959257	-0.0491474	0.256122	0.0481742	0.00232075	-0.21133	0.033473	-0.036671	0.00396691
195	22	RESI	314.4	1.3	86.2	14.63	49	8.4	1.80507	3	0.207876	0.0799036	0.216546	0.100644	0.0484704	0.26872	0.00867052	7.51779e-05	-0.0924525	0.0387716	-0.0495005	-0.00188253
196	22	RESI	314.4	1.3	86.2	14.63	49	8.4	1.80507	7	0.310777	0.0524302	0.330127	0.103369	0.157501	0.275996	0.0193501	0.000374427	0.064958	0.0375565	-0.0764398	-0.0175574
197	22	RESI	314.4	1.3	86.2	14.63	49	8.4	1.80507	14	0.388912	0.0743631	0.444644	0.110251	0.260524	0.294371	0.0557321	0.00310607	0.17828	0.0435385	-0.0959387	-0.00284572
198	22	RESI	314.4	1.3	86.2	14.63	49	8.4	1.80507	21	0.70487	0.107556	0.6829	0.23461	0.291102	0.626408	0.0219704	0.0004827	0.26655	0.112707	-0.0643492	0.0463824
199	22	RESI	314.4	1.3	86.2	14.63	49	8.4	1.80507	28	0.795337	0.0636329	0.796197	0.104734	0.621291	0.279641	0.000860307	7.40129e-07	0.297403	0.159033	-0.0237075	0.0418584
200	24	RESI	314.4	1.3	86.2	14.63	59	8.38	0.375	0	0	0.0448399	-0.0131809	0.0989064	-0.178355	0.26408	0.0131809	0.000173735	-0.183589	-0.065049	-0.0359299	-0.0502227
201	24	RESI	314.4	1.3	86.2	14.63	59	8.38	0.375	1	0.0171627	0.0602098	0.0248234	0.100155	-0.142436	0.267415	0.00766076	5.86873e-05	-0.131915	-0.0727034	-0.039768	-0.0524004
202	24	RESI	314.4	1.3	86.2	14.63	59	8.38	0.375	7	0.0947882	0.090629	0.0875343	0.108324	-0.0933672	0.289226	0.00725396	5.262e-05	0.0320705	-0.133327	-0.0491437	-0.0836758
203	24	RESI	314.4	1.3	86.2	14.63	59	8.38	0.375	14	0.0906419	0.0484608	0.0946731	0.103684	-0.0784797	0.276837	0.00403124	1.62509e-05	0.0987669	-0.157369	-0.0741853	-0.0941497
204	24	RESI	314.4	1.3	86.2	14.63	59	8.38	0.375	21	0.132945	0.0835134	0.0949936	0.108713	-0.0865567	0.290263	0.0379513	0.0014403	0.113537	-0.17539	-0.0870835	-0.0776791
205	24	RESI	314.4	1.3	86.2	14.63	59	8.38	0.375	28	0.0799874	0.223789	0.000111462	0.120471	-0.201076	0.321659	0.0798759	0.00638017	0.099425	-0.223547	-0.12237	-0.0750068
206	24	RESI	314.4	1.3	86.2	14.63	59	8.38	0.375	35	0.184275	0.0219227	0.21832	0.108936	0.0363961	0.29086	0.0340442	0.00115901	0.200801	-0.180579	-0.0980753	-0.025437
207	24	RESI	314.4	1.3	86.2	14.63	59	8.38	0.375	42	0.176613	0.0798263	0.18678	0.1043	0.0125982	0.278482	0.0101673	0.000103375	0.123044	-0.170605	-0.0587952	-0.0284737
208	24	RESI	314.4	1.3	86.2	14.63	59	8.38	0.375	56	0.214402	0.0158126	0.225889	0.104254	0.0517847	0.278358	0.0114868	0.000131946	0.0523196	-0.100501	-0.00764533	-0.0398944
209	24	RESI	314.4	1.3	86.2	14.63	59	8.38	0.375	63	0.216711	0.0932739	0.271921	0.109983	0.0882492	0.293656	0.0552101	0.00304816	0.0394873	-0.0459758	0.00302792	-0.0462282
210	23	RESI	314.4	1.3	86.2	14.63	60	8.88	0.901	0	0	0	0.0473362	0.0972303	-0.115038	0.259605	0.0473362	0.00224072	-0.186167	-0.0528237	-0.0239835	-0.0112994
211	23	RESI	314.4	1.3	86.2	14.63	60	8.88	0.901	0.166667	0.0938437	0.0439275	0.0516805	0.0963739	-0.109264	0.257318	0.0421633	0.00177774	-0.178145	-0.0552447	-0.024871	-0.0116687
212	23	RESI	314.4	1.3	86.2	14.63	60	8.88	0.901	1	0.102507	0.062345	0.0699604	0.0950509	-0.0887746	0.253786	0.0325468	0.00105929	-0.13976	-0.0681752	-0.0298224	-0.0138917
213	23	RESI	314.4	1.3	86.2	14.63	60	8.88	0.901	2	0.0683977	0.0313668	0.0846569	0.0970623	-0.0774373	0.259156	0.0162592	0.00026436	-0.0987896	-0.0850975	-0.0362006	-0.0168654
214	23	RESI	314.4	1.3	86.2	14.63	60	8.88	0.901	3	0.0812796	0.0313668	0.0951108	0.100968	-0.0735049	0.269583	0.0138312	0.000191302	-0.0633421	-0.102431	-0.0416188	-0.0191072
215	23	RESI	314.4	1.3	86.2	14.63	60	8.88	0.901	7	0.156431	0.0252064	0.144606	0.106112	-0.0326	0.283318	0.0118249	0.000139829	0.0429199	-0.159531	-0.0461128	-0.0142801
216	23	RESI	314.4	1.3	86.2	14.63	60	8.88	0.901	14	0.19778	0.0339631	0.182925	0.107507	0.00338783	0.287045	0.0148544	0.000220652	0.122604	-0.173945	-0.0709448	-0.0163988
217	23	RESI	314.4	1.3	86.2	14.63	60	8.88	0.901	21	0.101099	0.0288391	0.121416	0.107551	-0.0581944	0.287161	0.0203172	0.00041279	0.114257	-0.186476	-0.0997424	-0.0282331
218	23	RESI	314.4	1.3	86.2	14.63	60	8.88	0.901	28	0.0655264	0.0562551	0.0875551	0.103567	-0.0854015	0.276524	0.0220288	0.000485267	0.117111	-0.20009	-0.126457	-0.0246197
219	23	RESI	314.4	1.3	86.2	14.63	60	8.88	0.901	42	0.163548	0.0333514	0.17561	0.103863	0.00215851	0.277315	0.0120622	0.000145498	0.102896	-0.167016	-0.0724449	-0.00943491
220	23	RESI	314.4	1.3	86.2	14.63	60	8.88	0.901	56	0.184143	0.0320817	0.236617	0.120144	0.0359771	0.320784	0.0524747	0.00275359	0.0379534	-0.0952508	-0.0244059	-0.00328966
221	23	RESI	314.4	1.3	86.2	14.63	60	8.88	0.901	70	0.245827	0.0278691	0.232696	0.110922	0.0474564	0.296162	0.0131307	0.000172414	-0.0467117	-0.029445	-0.010381	-0.00237609
222	25	RBC	434.5	2.2	91.2	5.5	45.5	10.1	4.828	0	0	0.097565	0.11541	0.0959642	-0.0448506	0.256225	0.11541	0.0133194	-0.369919	0.106364	0.0186684	0.038687
223	25	RBC	434.5	2.2	91.2	5.5	45.5	10.1	4.828	0.083	0.0243769	0.197936	0.14722	0.0955205	-0.0122993	0.25504	0.122843	0.0150904	-0.355413	0.113354	0.0224975	0.0451714
224	25	RBC	434.5	2.2	91.2	5.5	45.5	10.1	4.828	0.25	0.104256	0.174852	0.211449	0.0948301	0.053083	0.253196	0.107193	0.0114903	-0.326151	0.127485	0.0302472	0.0582581
225	25	RBC	434.5	2.2	91.2	5.5	45.5	10.1	4.828	0.5	0.275858	0.0978988	0.307717	0.0942199	0.150369	0.251567	0.0318591	0.001015	-0.282327	0.148702	0.0418929	0.0778389
226	25	RBC	434.5	2.2	91.2	5.5	45.5	10.1	4.828	1	0.63466	0.148186	0.497514	0.0940359	0.340474	0.251076	0.137146	0.0188091	-0.195775	0.190643	0.0648493	0.116187
227	25	RBC	434.5	2.2	91.2	5.5	45.5	10.1	4.828	1.5	0.897787	0.010016	0.677969	0.094651	0.519902	0.252718	0.219818	0.0483198	-0.112758	0.230637	0.0864619	0.152018
228	25	RBC	434.5	2.2	91.2	5.5	45.5	10.1	4.828	2	0.943335	0.0132372	0.84338	0.0959294	0.683177	0.256132	0.099955	0.00999101	-0.0353463	0.267393	0.105868	0.183855
229	25	RBC	434.5	2.2	91.2	5.5	45.5	10.1	4.828	2.5	0.972852	0.0119022	0.990275	0.0983344	0.826057	0.262553	0.0174236	0.000303581	0.0351495	0.300139	0.122635	0.210741
230	26	RBC	434.5	2.2	91.2	5.5	51.6	7.82	2.186	0	0	0.0324188	0.000382041	0.0962161	-0.160299	0.256897	0.000382041	1.45955e-07	-0.335499	-0.000324684	-0.0249212	0.0395172
231	26	RBC	434.5	2.2	91.2	5.5	51.6	7.82	2.186	1	0.174296	0.065819	0.117906	0.0945613	-0.0400111	0.252479	0.0563899	0.00317982	-0.257649	0.0119517	-0.0178903	0.0598835
232	26	RBC	434.5	2.2	91.2	5.5	51.6	7.82	2.186	2	0.130272	0.0523083	0.252235	0.0945746	0.0942954	0.252514	0.121963	0.014875	-0.176506	0.0278731	-0.00853474	0.0877924
233	26	RBC	434.5	2.2	91.2	5.5	51.6	7.82	2.186	3	0.41769	0.290668	0.397042	0.0943173	0.239533	0.251827	0.0206479	0.000426337	-0.0954359	0.046991	0.00284705	0.12103
234	26	RBC	434.5	2.2	91.2	5.5	51.6	7.82	2.186	4	0.557511	0.247034	0.536865	0.0945026	0.379046	0.252322	0.0206462	0.000426265	-0.0198003	0.0664825	0.0139422	0.154631
235	26	RBC	434.5	2.2	91.2	5.5	51.6	7.82	2.186	5	0.686487	0.146303	0.655877	0.0950439	0.497154	0.253767	0.0306098	0.000936962	0.0453726	0.0831099	0.022263	0.183522
236	26	RBC	434.5	2.2	91.2	5.5	51.6	7.82	2.186	6	0.719096	0.166108	0.745942	0.0954161	0.586597	0.254761	0.0268461	0.000720715	0.097667	0.095045	0.026748	0.204872
237	26	RBC	434.5	2.2	91.2	5.5	51.6	7.82	2.186	7	0.818536	0.0664225	0.807198	0.0957069	0.647367	0.255538	0.011338	0.000128551	0.137402	0.102046	0.0277885	0.21835
238	26	RBC	434.5	2.2	91.2	5.5	51.6	7.82	2.186	8	0.849349	0.15276	0.844351	0.096729	0.682813	0.258267	0.00499845	2.49845e-05	0.166577	0.10471	0.0263141	0.225139
239	26	RBC	434.5	2.2	91.2	5.5	51.6	7.82	2.186	10	0.873318	0.0327623	0.876587	0.102316	0.705719	0.273184	0.00326881	1.06851e-05	0.205471	0.102077	0.0200335	0.227395
240	26	RBC	434.5	2.2	91.2	5.5	51.6	7.82	2.186	14	0.924499	0.0252663	0.913649	0.10846	0.732522	0.289587	0.0108492	0.000117704	0.261811	0.0965931	0.00792724	0.225708
241	26	RBC	434.5	2.2	91.2	5.5	51.6	7.82	2.186	21	0.923145	0.0349889	0.924143	0.104502	0.749625	0.279021	0.000998687	9.97376e-07	0.291369	0.120972	0.00126097	0.188931
242	26	RBC	434.5	2.2	91.2	5.5	51.6	7.82	2.186	28	0.941784	0.0338472	0.934471	0.104636	0.759729	0.279377	0.00731364	5.34893e-05	0.287581	0.152674	0.0273274	0.145278
243	27	RBC	434.5	2.2	91.2	5.5	66.3	7.79	5.463	0	0	0.0292353	0.00983895	0.096936	-0.152044	0.258819	0.00983895	9.6805e-05	-0.175199	-0.0824851	-0.00753235	-0.0465542
244	27	RBC	434.5	2.2	91.2	5.5	66.3	7.79	5.463	3	0.0508356	0.0702991	0.0482497	0.118182	-0.149114	0.315545	0.0025859	6.68687e-06	-0.0640848	-0.156993	-0.00194488	-0.0503376
245	27	RBC	434.5	2.2	91.2	5.5	66.3	7.79	5.463	7	0.0296921	0.0324373	0.0338004	0.104341	-0.140449	0.278591	0.00410833	1.68784e-05	0.0120727	-0.220153	-0.00142525	-0.078304
246	27	RBC	434.5	2.2	91.2	5.5	66.3	7.79	5.463	15	0.0766568	0.0254851	0.0849283	0.110104	-0.0989454	0.293978	0.00827149	6.84175e-05	0.0749421	-0.189213	0.00328958	-0.1257
247	27	RBC	434.5	2.2	91.2	5.5	66.3	7.79	5.463	21	0.100771	0.0460749	0.116946	0.110245	-0.0671643	0.294355	0.016175	0.000261631	0.0779952	-0.142169	0.00561271	-0.146103
248	27	RBC	434.5	2.2	91.2	5.5	66.3	7.79	5.463	28	0.130849	0.0324349	0.135315	0.110247	-0.0487979	0.294361	0.00446675	1.99519e-05	0.0878747	-0.103455	0.00875609	-0.179471
249	27	RBC	434.5	2.2	91.2	5.5	66.3	7.79	5.463	35	0.249874	0.0360314	0.250514	0.104491	0.0760131	0.278992	0.000639435	4.08877e-07	0.125561	-0.071926	0.0186425	-0.143374
250	27	RBC	434.5	2.2	91.2	5.5	66.3	7.79	5.463	42	0.556923	0.204554	0.556134	0.104487	0.38164	0.278981	0.00078876	6.22143e-07	0.181683	0.00465837	0.0471274	0.00105469
251	27	RBC	434.5	2.2	91.2	5.5	66.3	7.79	5.463	49	0.84547	0.0811669	0.839238	0.104497	0.664728	0.279008	0.00623168	3.88339e-05	0.254272	0.0724686	0.0778923	0.112996
252	27	RBC	434.5	2.2	91.2	5.5	66.3	7.79	5.463	56	0.875384	0.0665897	0.877806	0.110366	0.693494	0.294678	0.00242111	5.86176e-06	0.246315	0.0922318	0.0807291	0.13692
253	27	RBC	434.5	2.2	91.2	5.5	66.3	7.79	5.463	63	0.896458	0.04969	0.912579	0.110878	0.727413	0.296045	0.0161215	0.000259903	0.237348	0.111754	0.086169	0.155698
254	28	RBC	434.5	2.2	91.2	5.5	51.6	19.5	2.099	0	0	0.0524669	0.0279734	0.0989377	-0.137253	0.264164	0.0279734	0.000782511	-0.283975	0.00807361	-0.0286915	0.0109563
255	28	RBC	434.5	2.2	91.2	5.5	51.6	19.5	2.099	1	0.10455	0.0910216	0.0723279	0.0961865	-0.0883036	0.256818	0.032222	0.00103826	-0.231455	0.0112387	-0.046145	0.017079
256	28	RBC	434.5	2.2	91.2	5.5	51.6	19.5	2.099	3	0.135916	0.0684709	0.164606	0.0972546	0.00219108	0.25967	0.0286902	0.000823129	-0.125573	0.0182235	-0.0791837	0.0295297
257	28	RBC	434.5	2.2	91.2	5.5	51.6	19.5	2.099	5	0.249707	0.0735778	0.268787	0.0981419	0.10489	0.262039	0.0190794	0.000364023	-0.0255763	0.0273491	-0.0977093	0.0431129
258	28	RBC	434.5	2.2	91.2	5.5	51.6	19.5	2.099	7	0.455203	0.0698614	0.378835	0.102177	0.2082	0.272812	0.0763681	0.00583208	0.0599809	0.0361269	-0.0964739	0.0575911
259	28	RBC	434.5	2.2	91.2	5.5	51.6	19.5	2.099	11	0.543758	0.1468	0.558717	0.101272	0.389593	0.270397	0.0149595	0.000223787	0.180262	0.0494609	-0.0681188	0.0755029
260	28	RBC	434.5	2.2	91.2	5.5	51.6	19.5	2.099	14	0.727797	0.149784	0.726275	0.0981235	0.562409	0.26199	0.00152184	2.31601e-06	0.26883	0.0802201	-0.0292264	0.0848419
261	28	RBC	434.5	2.2	91.2	5.5	51.6	19.5	2.099	18	0.904787	0.0443047	0.89523	0.101858	0.725127	0.271962	0.00955653	9.13273e-05	0.34644	0.123472	0.00929794	0.0944101
262	28	RBC	434.5	2.2	91.2	5.5	51.6	19.5	2.099	20	0.897367	0.0740705	0.898689	0.103359	0.726079	0.275969	0.00132135	1.74597e-06	0.3482	0.13177	0.00652232	0.0905854
263	29	SFN	464.8	4.1	92.4	7.2	45.5	5.2	1.87062	0	0	0.0478117	-0.0382809	0.0957784	-0.198231	0.255728	0.0382809	0.00146542	-0.355366	0.0328744	-0.0243544	-0.0130449
264	29	SFN	464.8	4.1	92.4	7.2	45.5	5.2	1.87062	0.25	0.00124364	0.0695178	-0.0213392	0.0947833	-0.179627	0.253071	0.0225829	0.000509987	-0.333851	0.0370277	-0.0225086	-0.0236173
265	29	SFN	464.8	4.1	92.4	7.2	45.5	5.2	1.87062	1	0	0.0858402	0.0398221	0.093931	-0.117043	0.250796	0.0398221	0.0015858	-0.266506	0.0515341	-0.0153892	-0.0514264
266	29	SFN	464.8	4.1	92.4	7.2	45.5	5.2	1.87062	2	0.0677219	0.111485	0.151788	0.0942824	-0.00566365	0.251734	0.084066	0.0070671	-0.171153	0.0766228	-0.00107311	-0.0742185
267	29	SFN	464.8	4.1	92.4	7.2	45.5	5.2	1.87062	2.2	0.0681741	0.0375311	0.178275	0.0943517	0.0207073	0.251919	0.1101	0.0121221	-0.15166	0.0823485	0.0023973	-0.0764217
268	29	SFN	464.8	4.1	92.4	7.2	45.5	5.2	1.87062	3	0.482872	0.0412419	0.292707	0.0946639	0.134618	0.252753	0.190165	0.0361627	-0.0745101	0.106273	0.0170587	-0.0777253
269	29	SFN	464.8	4.1	92.4	7.2	45.5	5.2	1.87062	4	0.408819	0.260329	0.437991	0.0961481	0.277424	0.256715	0.0291729	0.000851057	0.0143536	0.134562	0.0334478	-0.0659821
270	29	SFN	464.8	4.1	92.4	7.2	45.5	5.2	1.87062	5	0.657547	0.237158	0.566365	0.102358	0.395427	0.273296	0.0911817	0.0083141	0.0889777	0.157	0.044056	-0.045279
271	30	TRM	615.4	3.4	102	12.6	45.5	4.5	0.917	0	0	0.0489067	0.00395678	0.0943902	-0.153675	0.252022	0.00395678	1.56561e-05	-0.372987	0.0579174	0.0114842	-0.014068
272	30	TRM	615.4	3.4	102	12.6	45.5	4.5	0.917	0.0416667	0.0125842	0.0214739	0.0144489	0.094261	-0.142967	0.251677	0.00186467	3.47701e-06	-0.366853	0.0600916	0.0131677	-0.013567
273	30	TRM	615.4	3.4	102	12.6	45.5	4.5	0.917	0.125	0.0244057	0.0165521	0.0354268	0.0940563	-0.121647	0.25113	0.011021	0.000121463	-0.354587	0.0644481	0.0165233	-0.0125676
274	30	TRM	615.4	3.4	102	12.6	45.5	4.5	0.917	0.25	0.139443	0.12078	0.066849	0.0938743	-0.0899212	0.250645	0.0725943	0.00526993	-0.336204	0.070997	0.0215219	-0.0110763
275	30	TRM	615.4	3.4	102	12.6	45.5	4.5	0.917	1	0.180628	0.0707016	0.25135	0.0950173	0.0926707	0.253696	0.0707217	0.00500155	-0.227767	0.110011	0.049964	-0.00246858
276	30	TRM	615.4	3.4	102	12.6	45.5	4.5	0.917	3	0.620948	0.25287	0.629925	0.102626	0.45854	0.274011	0.00897689	8.05845e-05	0.00994285	0.192833	0.0938673	0.0116714

## Sheet: File S6 (BSA)
BSA	ID		Scaffold Specific Parameters (GPR Features)				In Vitro Observations		GPR Results						Shapley Values for Parameters
Observation #	Scaffold #	Drug	%CAC	%Load (wt.)	Fd (µm)	Time (Days)	Observed Avg F(t)	Observed Stdev F(t)	Predicted F(t)	Predicted Stdev F(t)	90% CI (lower)	90% CI (upper)	AE	SE	Time	%Load	%CAC	Fd
1	31	BSA	51.6	4.26	0.701	0	7.9566e-18	0.00294285	-0.021092	0.176759	-0.31628	0.274096	0.021092	0.000444873	-0.313	0.0446748	-0.0265112	-0.0290443
2	31	BSA	51.6	4.26	0.701	0.083	0.0369743	0.00831379	-0.0109332	0.176334	-0.305412	0.283545	0.0479075	0.00229513	-0.305212	0.0475116	-0.027312	-0.0287091
3	31	BSA	51.6	4.26	0.701	1	0.146796	0.0178263	0.0948485	0.173697	-0.195226	0.384923	0.0519471	0.0026985	-0.222364	0.0771494	-0.0366895	-0.0260355
4	31	BSA	51.6	4.26	0.701	3	0.333616	0.0941422	0.272492	0.173834	-0.0178114	0.562796	0.0611241	0.00373615	-0.0757765	0.124021	-0.0515462	-0.0269946
5	31	BSA	51.6	4.26	0.701	5	0.335226	0.0625932	0.391489	0.175641	0.0981686	0.684809	0.0562624	0.00316545	0.0215763	0.146066	-0.0459052	-0.0330371
6	31	BSA	51.6	4.26	0.701	7	0.748987	0.0159921	0.495456	0.179322	0.195989	0.794923	0.253531	0.0642781	0.0918463	0.158969	-0.021644	-0.036504
7	31	BSA	51.6	4.26	0.701	11	0.864591	0.0897754	0.705879	0.194639	0.380832	1.03093	0.158711	0.0251893	0.209966	0.192683	0.0293869	-0.0289454
8	31	BSA	51.6	4.26	0.701	14	0.800069	0.0459933	0.804247	0.208769	0.455603	1.15289	0.00417785	1.74544e-05	0.273449	0.202575	0.0462299	-0.0207953
														Avg Abs SV	0.189149	0.124206	0.0356531	0.0287582
